# Supplementary material
Source: publisher figshare collection journal article supplement (https://acs.figshare.com/ndownloader/files/4380136)
Supplement: Supplementary file 1 [file 4380136]

## Supporting Information

### **Bifunctional Organocatalyst for Activation of Carbon Dioxide and Epoxide to Produce Cyclic Carbonate: Betaine as a New Catalytic Motif**

Yoshihiro Tsutsumi, Kyohei Yamakawa, Masahiko Yoshida, Tadashi Ema, and Takashi Sakai\*  
*Division of Chemistry and Biochemistry, Graduate School of Natural Science and Technology,  
Okayama University, Tsushima, Okayama 700-8530, Japan*

|                                                                                            |     |
|--------------------------------------------------------------------------------------------|-----|
| [1] Synthetic Procedures for Catalysts-----                                                | S2  |
| [2] Coupling Reaction of CO <sub>2</sub> with Epoxide-----                                 | S9  |
| [3] Synthesis of Betaine–CO <sub>2</sub> Adduct and Subsequent Reaction with Epoxide ----- | S11 |
| [4] Optimization of Reaction Conditions Using Catalyst <b>1</b> -----                      | S12 |
| [5] <sup>1</sup> H and <sup>13</sup> C NMR Spectra-----                                    | S14 |

## [1] Synthetic Procedures for Catalysts.

### (1-A) Synthetic Procedure for Catalyst 1.

Allyldimethyl(2-hydroxyphenyl)ammonium bromide (**11**) was prepared according to the literature.<sup>1</sup>

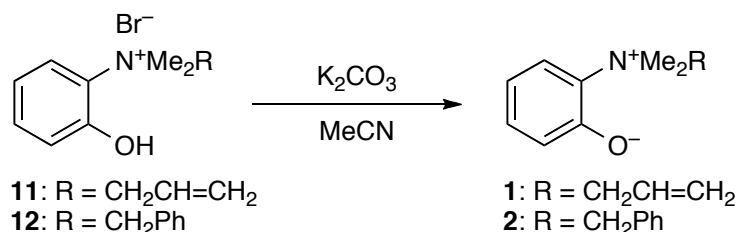

**2-(Allyldimethylammonio)phenolate (1).**<sup>2</sup> A mixture of **11** (800 mg, 3.10 mmol) and K<sub>2</sub>CO<sub>3</sub> (514 mg, 3.72 mmol) in dry MeCN (15 mL) under N<sub>2</sub> was stirred at room temperature for 16 h. After filtration, the filtrate was concentrated. The product was washed with Et<sub>2</sub>O to give **1** as a light brown powder (521 mg, 95%): mp 75–80 °C (lit.<sup>2</sup> mp 80–83 °C); <sup>1</sup>H NMR (400 MHz, CDCl<sub>3</sub>) δ 3.58 (s, 6H), 5.00 (d, *J* = 7.2 Hz, 2H), 5.43–5.51 (m, 2H), 5.59–5.68 (m, 1H), 6.24 (t, *J* = 8.4 Hz, 1H), 6.84 (dd, *J* = 1.2, 8.4 Hz, 1H), 6.97 (dd, *J* = 1.2, 8.4 Hz, 1H), 7.11–7.15 (m, 1H); <sup>13</sup>C NMR (100 MHz, CDCl<sub>3</sub>) δ 51.6, 65.7, 108.7, 119.0, 124.9, 126.3, 126.9, 130.0, 131.2, 163.2; IR (KBr) 3006, 1645, 1591, 1479, 1451, 1402, 1310, 1134, 1076, 1042, 959, 891, 829, 749, 700 cm<sup>-1</sup>; HRMS (FAB, nitrobenzyl alcohol) calcd for C<sub>11</sub>H<sub>16</sub>NO 178.1232, found 178.1244 (M + H).

### (1-B) Synthetic Procedure for Catalyst 2.

Benzyltrimethyl(2-hydroxyphenyl)ammonium bromide (**12**) was prepared according to the literature.<sup>1</sup>

**2-(Benzyltrimethylammonio)phenolate (2).**<sup>2</sup> A mixture of **12** (308 mg, 1.00 mmol) and K<sub>2</sub>CO<sub>3</sub> (166 mg, 1.20 mmol) in dry MeCN (5 mL) under N<sub>2</sub> was stirred at room temperature for 16 h. After filtration, the filtrate was concentrated. The product was washed with Et<sub>2</sub>O to give **2** as a white foamy solid (226 mg, 99%): mp 95–97 °C (lit.<sup>2</sup> mp 95–97 °C); <sup>1</sup>H NMR (400 MHz, CDCl<sub>3</sub>) δ 3.68 (s, 6H), 5.60 (s, 2H), 6.29 (t, *J* = 7.6 Hz, 1H), 6.75 (dd, *J* = 1.6, 8.4 Hz, 1H), 7.07 (dd, *J* = 1.6, 8.4 Hz, 1H), 7.17–7.27 (m, 5H), 7.32–7.35 (m, 1H); <sup>13</sup>C NMR (100 MHz, CDCl<sub>3</sub>) δ 51.4, 65.3, 110.8, 119.8, 122.8, 127.9, 128.8, 129.4, 129.5, 130.9, 132.0, 160.7; IR (KBr) 3030, 2949, 2849, 2802, 1589, 1493, 1452, 1366, 1252, 1090, 1028, 937, 831, 731, 696 cm<sup>-1</sup>; HRMS (FAB, nitrobenzyl alcohol) calcd for C<sub>15</sub>H<sub>18</sub>NO 228.1388, found 228.1405 (M + H).

### (1-C) Synthetic Procedure for Catalyst 3.

(2-Hydroxyphenyl)trimethylammonium iodide (**13**) was prepared according to the literature.<sup>3</sup>

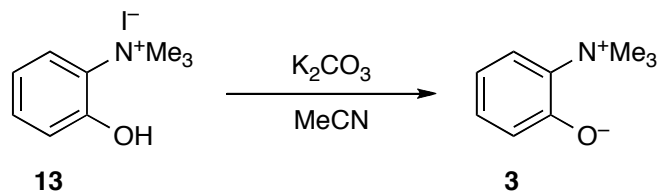

**2-(Trimethylammonio)phenolate (3).**<sup>4</sup> A mixture of **13** (884 mg, 3.17 mmol) and  $\text{K}_2\text{CO}_3$  (525 mg, 3.80 mmol) in dry MeCN (16 mL) under  $\text{N}_2$  was stirred at room temperature for 16 h. After filtration, the filtrate was concentrated. The product was washed with  $\text{Et}_2\text{O}$  to give **3** as a white powder (314 mg, 66%): mp 122 °C;  $^1\text{H}$  NMR (400 MHz,  $\text{DMSO}-d_6$ )  $\delta$  3.57 (s, 9H), 5.96 (t,  $J = 8.0$  Hz, 1H), 6.35 (d,  $J = 8.4$  Hz, 1H), 6.88 (t,  $J = 8.4$  Hz, 1H), 7.14 (d,  $J = 8.0$  Hz, 1H);  $^{13}\text{C}$  NMR (100 MHz,  $\text{DMSO}-d_6$ )  $\delta$  53.3, 107.5, 119.6, 123.5, 130.3, 133.6, 162.9; IR (KBr) 3055, 3032, 1591, 1485, 1462, 1435, 1406, 1337, 1234, 1138, 1042, 845, 820  $\text{cm}^{-1}$ ; HRMS (FAB, nitrobenzyl alcohol) calcd for  $\text{C}_9\text{H}_{14}\text{NO}$  152.1075, found 152.1085 ( $\text{M} + \text{H}$ ).

### (1-D) Synthetic Procedure for Catalyst 4.

(3-Hydroxyphenyl)trimethylammonium iodide (**14**) was prepared according to the literature.<sup>5</sup>

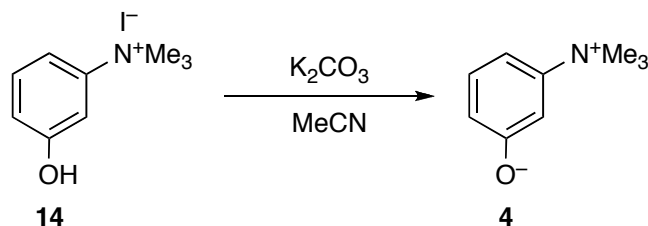

**3-(Trimethylammonio)phenolate (4).**<sup>6</sup> A mixture of **14** (350 mg, 1.25 mmol) and  $\text{K}_2\text{CO}_3$  (207 mg, 1.50 mmol) in dry MeCN (6 mL) under  $\text{N}_2$  was stirred at room temperature for 17 h. After filtration, the filtrate was concentrated. The product was washed with  $\text{Et}_2\text{O}$  and  $\text{CH}_2\text{Cl}_2$  to give **4** as a white powder (139 mg, 73%): mp 135–137 °C;  $^1\text{H}$  NMR (300 MHz,  $\text{DMSO}-d_6$ )  $\delta$  3.39 (s, 9H), 6.09 (dd,  $J = 1.8, 8.4$  Hz, 1H), 6.16 (dd,  $J = 2.7, 8.4$  Hz, 1H), 6.32 (t,  $J = 2.4$  Hz, 1H), 6.80 (t,  $J = 8.4$  Hz, 1H);  $^{13}\text{C}$  NMR (100 MHz,  $\text{DMSO}-d_6$ )  $\delta$  56.4, 104.4, 108.2, 118.3, 130.1, 148.7, 165.8; IR (KBr) 3082, 2889, 1601, 1531, 1492, 1342, 1300, 1138, 945, 833, 745  $\text{cm}^{-1}$ ; HRMS (FAB, nitrobenzyl alcohol) calcd for  $\text{C}_9\text{H}_{14}\text{NO}$  152.1075, found 152.1076 ( $\text{M} + \text{H}$ ).

#### (1-E) Synthetic Procedure for Catalyst 5.

(4-Hydroxyphenyl)trimethylammonium iodide (**15**) was prepared according to the literature.<sup>3</sup>

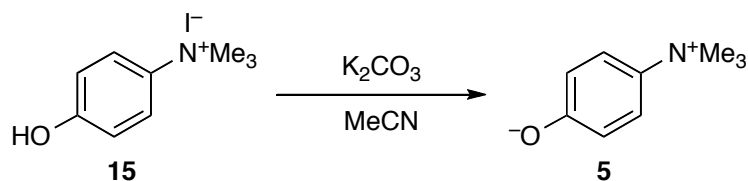

**4-(Trimethylammonio)phenolate (**5**).**<sup>7</sup> A mixture of **15** (350 mg, 1.25 mmol) and K<sub>2</sub>CO<sub>3</sub> (207 mg, 1.50 mmol) in dry MeCN (6 mL) under N<sub>2</sub> was stirred at room temperature for 16 h. After filtration, the filtrate was concentrated. The product was washed with Et<sub>2</sub>O to give **5** as a white powder (115 mg, 61%): mp 210 °C; <sup>1</sup>H NMR (300 MHz, DMSO-*d*<sub>6</sub>) δ 3.47 (s, 9H), 6.61 (d, *J* = 9.3 Hz, 2H), 7.51 (d, *J* = 9.3 Hz, 2H); <sup>13</sup>C NMR (100 MHz, DMSO-*d*<sub>6</sub>) δ 56.8, 116.7, 121.1, 134.8, 164.5; IR (KBr) 3190, 3012, 1597, 1516, 1489, 1416, 1215, 1146, 961, 833, 644 cm<sup>-1</sup>; HRMS (FAB, nitrobenzyl alcohol) calcd for C<sub>9</sub>H<sub>14</sub>NO 152.1075, found 152.1082 (M + H).

#### (1-F) Synthetic Procedure for Catalyst 6.

2-Amino-2'-methoxybiphenyl (**16**) was prepared according to the literature.<sup>8</sup>

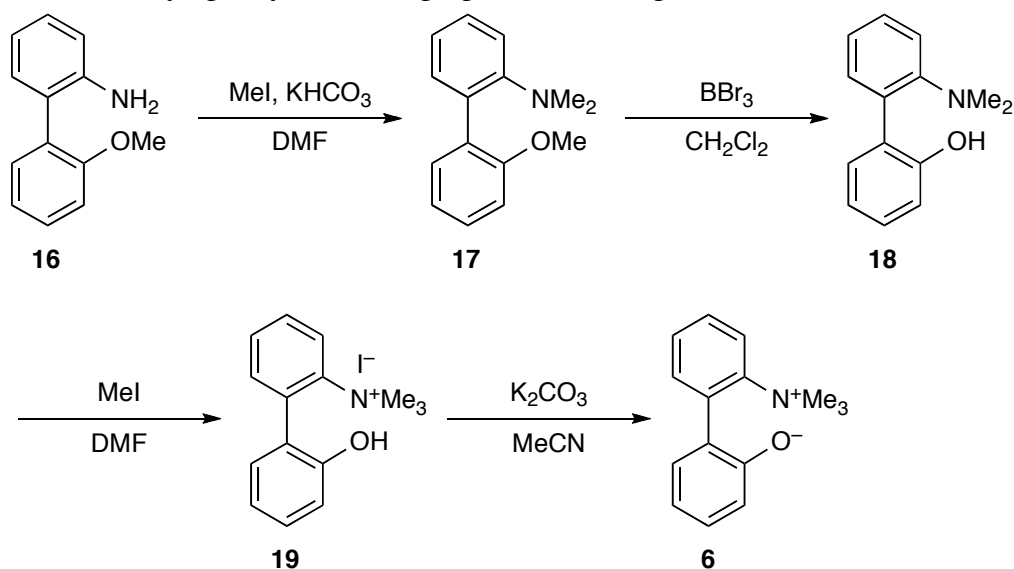

**2-(*N,N*-Dimethylamino)-2'-methoxybiphenyl (**17**).** A mixture of **16** (6.71 g, 33.7 mmol), KHCO<sub>3</sub> (7.09 g, 70.8 mmol), and MeI (5.3 mL, 84 mmol) in DMF (50 mL) under N<sub>2</sub> was stirred at room temperature for 5 h. After addition of H<sub>2</sub>O (10 mL), the product was extracted with CH<sub>2</sub>Cl<sub>2</sub> (30 mL × 3). The combined organic layers were dried over MgSO<sub>4</sub>, and concentrated. Purification by silica gel column chromatography (hexane/EtOAc (5:1)) gave **17** as a colorless oil (6.92 g, 90%): <sup>1</sup>H NMR (600 MHz, CDCl<sub>3</sub>) δ 2.53 (s, 6H), 3.79 (s, 3H), 6.97–7.01 (m, 3H), 7.05 (d, *J* = 8.4 Hz, 1H), 7.18 (dd, *J* = 1.8, 7.8 Hz, 1H), 7.26–7.29 (m, 2H), 7.31 (d, *J* = 7.8 Hz, 1H); <sup>13</sup>C NMR (150 MHz, CDCl<sub>3</sub>) δ 43.2, 55.5, 111.2, 117.7, 120.5, 120.7, 127.9, 128.0, 130.7, 131.0, 131.1, 132.2, 151.8, 156.4; IR (neat) 3046, 2938, 2831, 2778,

1590, 1502, 1482, 1459, 1428, 1320, 1258, 1232, 1122, 1052, 1029, 1004, 947, 755, 736  $\text{cm}^{-1}$ ; Anal. Calcd for  $\text{C}_{15}\text{H}_{17}\text{NO}$ : C, 79.26; H, 7.54; N, 6.16. Found: C, 79.36; H, 7.60; N, 5.82.

**2-(*N,N*-Dimethylamino)-2'-hydroxybiphenyl (18).** A solution of  $\text{BBr}_3$  in dry  $\text{CH}_2\text{Cl}_2$  (1.0 M, 36 mL, 36 mmol) was added dropwise to a solution of **17** (6.92 g, 30.4 mmol) in dry  $\text{CH}_2\text{Cl}_2$  (90 mL) under  $\text{N}_2$  in an ice bath over 5 min. The mixture was stirred at room temperature for 22 h. After addition of  $\text{H}_2\text{O}$  (10 mL) and adjustment to pH 7 by using 10% NaOH, the product was extracted with  $\text{CH}_2\text{Cl}_2$  (20 mL  $\times$  3). The combined organic layers were dried over  $\text{MgSO}_4$ , and concentrated. Purification by silica gel column chromatography (hexane/EtOAc (5:1)) gave **18** as a white solid (6.21 g, 96%): mp 53–55  $^\circ\text{C}$ ;  $^1\text{H}$  NMR (600 MHz,  $\text{CDCl}_3$ )  $\delta$  2.72 (s, 6H), 7.00 (dt,  $J$  = 1.2, 7.8 Hz, 1H), 7.04 (dd,  $J$  = 1.2, 7.8 Hz, 1H), 7.21–7.24 (m, 2H), 7.30 (ddd,  $J$  = 1.8, 7.2, 7.8 Hz, 1H), 7.37–7.41 (m, 2H), 7.44 (dd,  $J$  = 1.8, 7.8 Hz, 1H), 10.89 (br s, 1H);  $^{13}\text{C}$  NMR (150 MHz,  $\text{CDCl}_3$ )  $\delta$  43.5, 118.1, 118.8, 120.4, 124.6, 128.1, 128.4, 129.0, 130.7, 133.5, 134.6, 148.2, 155.2; IR (KBr) 3018, 2953, 2845, 2783, 1599, 1493, 1474, 1460, 1429, 1296, 1267, 1236, 1153, 1042, 932, 764, 729  $\text{cm}^{-1}$ ; Anal. Calcd for  $\text{C}_{14}\text{H}_{15}\text{NO}$ : C, 78.84; H, 7.09; N, 6.57. Found: C, 78.68; H, 7.15; N, 6.19.

**2-(2-Hydroxyphenyl)phenyltrimethylammonium iodide (19).** A mixture of **18** (6.34 g, 29.7 mmol) and MeI (5.7 mL, 91 mmol) in dry DMF (30 mL) under  $\text{N}_2$  was stirred at 40  $^\circ\text{C}$  for 3 d. After removal of DMF, recrystallization from MeOH/Et<sub>2</sub>O gave **19** as colorless crystals (7.84 g, 74%): mp 186–187  $^\circ\text{C}$ ;  $^1\text{H}$  NMR (600 MHz,  $\text{DMSO}-d_6$ )  $\delta$  3.50 (s, 9H), 6.95 (dt,  $J$  = 1.2, 7.2 Hz, 1H), 7.00 (d,  $J$  = 7.8 Hz, 1H), 7.17 (dd,  $J$  = 1.8, 7.8 Hz, 1H), 7.24 (dd,  $J$  = 1.8, 7.2 Hz, 1H), 7.32–7.35 (m, 1H), 7.58 (dt,  $J$  = 1.2, 7.2 Hz, 1H), 7.63 (ddd,  $J$  = 1.8, 7.2, 8.4 Hz, 1H), 8.04 (d,  $J$  = 8.4 Hz, 1H), 10.02 (s, 1H);  $^{13}\text{C}$  NMR (150 MHz,  $\text{DMSO}-d_6$ )  $\delta$  57.3, 116.2, 119.5, 121.8, 127.0, 129.5, 130.1, 130.5, 131.3, 132.5, 135.7, 144.9, 154.1; IR (KBr) 3204, 3063, 3032, 1587, 1487, 1447, 1269, 1198, 1111, 1088, 847, 772  $\text{cm}^{-1}$ ; Anal. Calcd for  $\text{C}_{15}\text{H}_{18}\text{NOI}$ : C, 50.72; H, 5.11; N, 3.94. Found: C, 51.09; H, 5.14; N, 3.55.

**2-(2-Trimethylammoniophenyl)phenolate (6).** A mixture of **19** (945 mg, 2.66 mmol) and  $\text{K}_2\text{CO}_3$  (393 mg, 2.84 mmol) in dry MeCN (13 mL) under  $\text{N}_2$  was stirred at room temperature overnight. After filtration and concentration, the product was washed with Et<sub>2</sub>O to give **6** as a white powder (567 mg, 94%): mp 150  $^\circ\text{C}$  (dec);  $^1\text{H}$  NMR (600 MHz,  $\text{DMSO}-d_6$ )  $\delta$  3.55 (s, 9H), 6.51 (t,  $J$  = 7.2 Hz, 1H), 6.59 (d,  $J$  = 7.8 Hz, 1H), 6.98 (dd,  $J$  = 1.8, 7.8 Hz, 1H), 7.03–7.05 (m, 1H), 7.12 (dd,  $J$  = 2.4, 7.2 Hz, 1H), 7.50–7.55 (m, 2H), 7.96 (dd,  $J$  = 1.2, 7.8 Hz, 1H);  $^{13}\text{C}$  NMR (150 MHz, methanol- $d_4$ )  $\delta$  58.6, 117.6, 119.6, 122.0, 129.2, 130.3, 131.2, 131.4, 132.1, 136.0, 137.6, 146.4, 160.6; IR (KBr) 3063, 3026, 1622, 1593, 1483, 1306, 1150, 1049, 1003, 941, 851, 768, 613, 563  $\text{cm}^{-1}$ ; HRMS (FAB, nitrobenzyl alcohol) calcd for

C<sub>15</sub>H<sub>18</sub>NO 228.1383, found 228.1390 (M + H).

### (1-G) Synthetic Procedure for Catalyst 7.

2-Methoxy-1-(2-nitrophenyl)naphthalene (**20**) was prepared according to the literature.<sup>9</sup>

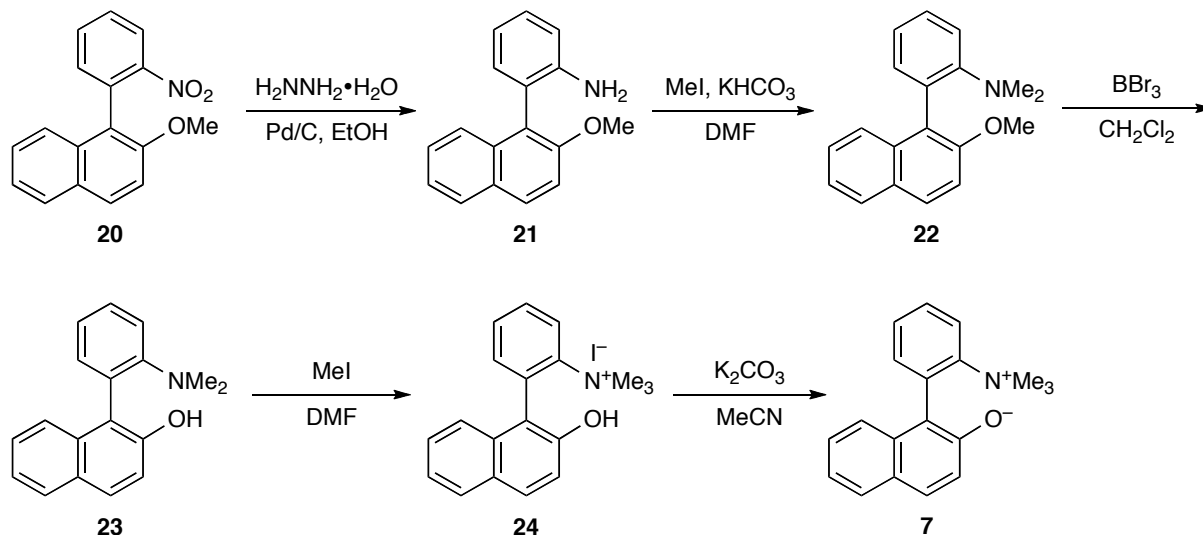

**1-(2-Aminophenyl)-2-methoxynaphthalene (**21**).**<sup>9</sup> Hydrazine monohydrate (80%, 12.5 mL) was added dropwise to a mixture of **20** (5.59 g, 20.0 mmol) and Pd/C (10% (w/w), 2.76 g) in EtOH (60 mL) at 50 °C over 25 min. The mixture was heated at reflux for 12 h. After filtration and concentration, the product was extracted with CH<sub>2</sub>Cl<sub>2</sub> (30 mL × 3). The combined organic layers were dried over Na<sub>2</sub>SO<sub>4</sub>, and concentrated. Purification by silica gel column chromatography (hexane/EtOAc (7:1)–(2:1)) gave **21** as white crystals (4.18 g, 84%): mp 84.5–86 °C; <sup>1</sup>H NMR (600 MHz, CDCl<sub>3</sub>) δ 3.34 (br s, 2H), 3.88 (s, 3H), 6.88 (d, *J* = 7.8 Hz, 1H), 6.92 (dt, *J* = 1.2, 7.2 Hz, 1H), 7.11 (dd, *J* = 1.2, 7.2 Hz, 1H), 7.27 (dt, *J* = 1.2, 7.8 Hz, 1H), 7.35–7.38 (m, 2H), 7.40 (d, *J* = 9.0 Hz, 1H), 7.44–7.47 (m, 1H), 7.83–7.85 (m, 1H), 7.92 (d, *J* = 9.0 Hz, 1H); <sup>13</sup>C NMR (150 MHz, CDCl<sub>3</sub>) δ 56.7, 113.9, 115.4, 118.4, 121.3, 121.8, 123.7, 125.0, 126.6, 127.9, 128.6, 129.2, 129.5, 131.7, 133.3, 144.7, 154.4; IR (KBr) 3450, 3364, 3017, 2937, 2829, 1618, 1591, 1506, 1495, 1454, 1273, 1252, 1065, 810, 748 cm<sup>-1</sup>; HRMS (FAB, nitrobenzyl alcohol) calcd for C<sub>17</sub>H<sub>16</sub>NO 250.1232, found 250.1243 (M + H).

**1-[2-(*N,N*-Dimethylamino)phenyl]-2-methoxynaphthalene (**22**).** A mixture of **21** (3.73 g, 15.0 mmol), KHCO<sub>3</sub> (3.30 g, 33.0 mmol), and MeI (2.3 mL, 38 mmol) in dry DMF (30 mL) under N<sub>2</sub> was stirred at room temperature for 4 h. After addition of H<sub>2</sub>O (20 mL), the product was extracted with hexane/EtOAc (1:1) (40 mL × 3), and the combined organic layers were washed with H<sub>2</sub>O (30 mL), dried over Na<sub>2</sub>SO<sub>4</sub>, and concentrated. Purification by silica gel column chromatography (hexane/EtOAc (10:1)) gave **22** as a white solid (3.65 g, 88%): mp 78–79 °C; <sup>1</sup>H NMR (600 MHz, CDCl<sub>3</sub>) δ 2.46 (s, 6H), 3.89 (s, 3H), 7.06 (t, *J* = 6.6 Hz, 1H), 7.13–7.16 (m, 2H), 7.30–7.34 (m, 2H), 7.38–7.40 (m, 3H), 7.81 (dd, *J* = 1.8, 7.2 Hz, 1H),

7.88 (d,  $J = 9.0$  Hz, 1H);  $^{13}\text{C}$  NMR (150 MHz,  $\text{CDCl}_3$ )  $\delta$  43.2, 56.6, 113.9, 117.8, 121.0, 123.4, 125.3, 125.7, 126.0, 127.7, 128.2, 128.7, 129.0, 129.1, 133.0, 133.0, 152.8, 153.6; IR (KBr) 3047, 2937, 2822, 2768, 1618, 1591, 1508, 1493, 1464, 1448, 1431, 1331, 1313, 1269, 1256, 1144, 1069, 1049, 941, 806, 770, 758  $\text{cm}^{-1}$ ; HRMS (FAB, nitrobenzyl alcohol) calcd for  $\text{C}_{19}\text{H}_{20}\text{NO}$  278.1545, found 278.1557 ( $\text{M} + \text{H}$ ).

**1-[2-(*N,N*-Dimethylamino)phenyl]-2-hydroxynaphthalene (23).** A solution of  $\text{BBr}_3$  in dry  $\text{CH}_2\text{Cl}_2$  (1.0 M, 12 mL, 12 mmol) was added to a solution of **22** (2.77 g, 10.0 mmol) in dry  $\text{CH}_2\text{Cl}_2$  (20 mL) under  $\text{N}_2$  in an ice bath. The mixture was stirred at room temperature for 9 h. After adjustment to pH 7 by using 10% NaOH, the product was extracted with  $\text{CH}_2\text{Cl}_2$  (30 mL  $\times$  3). The combined organic layers were dried over  $\text{Na}_2\text{SO}_4$ , and concentrated. Purification by silica gel column chromatography (hexane/EtOAc (10:1)) gave **23** as a white solid (2.33 g, 89%): mp 123.5–124.5  $^\circ\text{C}$ ;  $^1\text{H}$  NMR (600 MHz,  $\text{CDCl}_3$ )  $\delta$  2.70 (s, 6H), 7.16 (dt,  $J = 1.2, 7.2$  Hz, 1H), 7.28 (dd,  $J = 1.2, 8.4$  Hz, 1H), 7.28 (d,  $J = 8.4$  Hz, 1H), 7.34 (ddd,  $J = 1.2, 6.6, 8.4$  Hz, 1H), 7.37 (ddd,  $J = 1.2, 6.6, 8.4$  Hz, 1H), 7.41–7.43 (m, 2H), 7.79 (d,  $J = 9.0$  Hz, 2H), 7.83 (dd,  $J = 1.8, 7.8$  Hz, 1H), 10.01 (br s, 1H);  $^{13}\text{C}$  NMR (150 MHz,  $\text{CDCl}_3$ )  $\delta$  43.5, 118.1, 120.6, 121.0, 122.9, 123.1, 125.3, 126.0, 128.1, 128.4, 129.3, 129.9, 130.6, 133.3, 135.3, 149.9, 152.0; IR (KBr) 3017, 2953, 2883, 2837, 1618, 1591, 1489, 1466, 1456, 1333, 1238, 1178, 1153, 1096, 988, 924, 820, 770, 756, 673  $\text{cm}^{-1}$ ; HRMS (FAB, nitrobenzyl alcohol) calcd for  $\text{C}_{18}\text{H}_{18}\text{NO}$  264.1388, found 264.1376 ( $\text{M} + \text{H}$ ).

**2-(2-Hydroxy-1-naphthyl)phenyltrimethylammonium iodide (24).** A mixture of **23** (1.84 g, 7.00 mmol) and MeI (1.3 mL, 21 mmol) in dry DMF (7 mL) under  $\text{N}_2$  was stirred at 40  $^\circ\text{C}$  for 3 d. After removal of DMF, recrystallization from MeOH/Et<sub>2</sub>O gave **24** as a white solid (2.49 g, 88%): mp 192–193  $^\circ\text{C}$ ;  $^1\text{H}$  NMR (600 MHz,  $\text{DMSO}-d_6$ )  $\delta$  3.45 (s, 9H), 6.98 (d,  $J = 7.8$  Hz, 1H), 7.15 (dd,  $J = 1.8, 7.8$  Hz, 1H), 7.33 (d,  $J = 9.0$  Hz, 1H), 7.35 (ddd,  $J = 1.2, 7.2, 8.4$  Hz, 1H), 7.40 (ddd,  $J = 1.2, 7.2, 8.4$  Hz, 1H), 7.65 (dt,  $J = 1.2, 7.2$  Hz, 1H), 7.72 (ddd,  $J = 1.8, 7.2, 9.0$  Hz, 1H), 7.91 (d,  $J = 7.8$  Hz, 1H), 7.98 (d,  $J = 9.0$  Hz, 1H), 8.14 (d,  $J = 9.0$  Hz, 1H), 10.39 (br s, 1H);  $^{13}\text{C}$  NMR (150 MHz,  $\text{DMSO}-d_6$ )  $\delta$  56.8, 118.5, 118.6, 122.4, 123.4, 124.4, 127.6, 128.1, 128.5, 129.9, 130.3, 130.8, 131.1, 133.5, 136.4, 146.0, 152.1; IR (KBr) 3179, 3063, 3011, 1622, 1506, 1489, 1429, 1340, 1273, 984, 947, 820, 760, 745  $\text{cm}^{-1}$ ; HRMS (FAB, nitrobenzyl alcohol) calcd for  $\text{C}_{19}\text{H}_{20}\text{NO}$  278.1545, found 278.1558 ( $\text{M} - \text{I}$ ).

**1-(2-Trimethylammoniophenyl)-2-naphtholate (7).** A mixture of **24** (405 mg, 1.00 mmol) and  $\text{K}_2\text{CO}_3$  (166 mg, 1.20 mmol) in dry MeCN (7 mL) under  $\text{N}_2$  was stirred at room temperature overnight. After filtration and concentration, the product was washed with Et<sub>2</sub>O to give **7** as a yellow powder (238 mg, 86%): mp 123–125  $^\circ\text{C}$ ;  $^1\text{H}$  NMR (600 MHz,  $\text{CDCl}_3$ )  $\delta$  3.60 (s, 9H), 6.76 (d,  $J = 8.4$  Hz, 1H), 7.16 (dt,  $J = 1.2, 7.2$  Hz, 1H), 7.22–7.23 (m, 2H), 7.28

(d,  $J = 9.0$  Hz, 1H), 7.47 (dt,  $J = 1.2, 7.2$  Hz, 1H), 7.51 (ddd,  $J = 1.8, 7.2, 9.0$  Hz, 1H), 7.66 (d,  $J = 9.0$  Hz, 1H), 7.71 (d,  $J = 7.2$  Hz, 1H), 7.91 (d,  $J = 7.8$  Hz, 1H);  $^{13}\text{C}$  NMR (150 MHz,  $\text{CDCl}_3$ )  $\delta$  57.5, 117.6, 120.8, 121.2, 122.1, 122.9, 126.6, 128.2, 129.2, 130.5, 130.8, 133.4, 134.3, 137.7, 145.9, 158.5; IR (KBr) 3055, 1616, 1587, 1489, 1421, 1366, 1340, 1275, 1234, 988, 951, 826, 756  $\text{cm}^{-1}$ ; HRMS (FAB, nitrobenzyl alcohol) calcd for  $\text{C}_{19}\text{H}_{20}\text{NO}$  278.1545, found 278.1554 ( $\text{M} + \text{H}$ ).

### (1-H) Synthetic Procedure for Catalyst 8.

(*R*)-2-(*N,N*-Dimethylamino)-2'-hydroxy-1,1'-binaphthyl (**25**) was prepared according to the literature.<sup>10</sup>

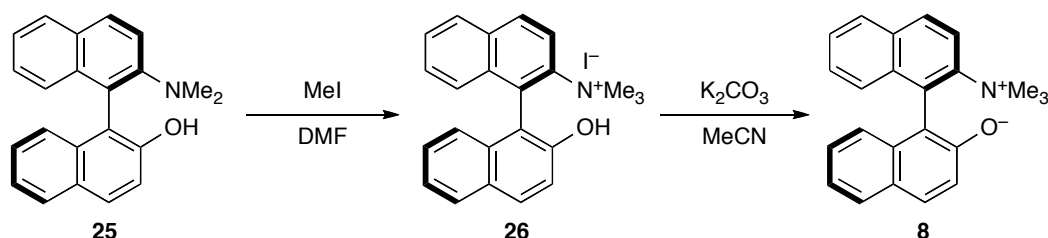

**(*R*)-1-(2-Hydroxy-1-naphthyl)-2-naphthyltrimethylammonium iodide (26).** A mixture of **25** (627 mg, 2.00 mmol) and MeI (0.37 mL, 6.0 mmol) in dry DMF (2 mL) under  $\text{N}_2$  was stirred at 40  $^\circ\text{C}$  for 3 d. After removal of DMF, purification by silica gel column chromatography ( $\text{CH}_2\text{Cl}_2/\text{MeOH}$  (1:0)–(10:1)) gave **26** as a pale yellow solid (573 mg, 63%): mp 117–118  $^\circ\text{C}$ ;  $^1\text{H}$  NMR (600 MHz,  $\text{CDCl}_3$ )  $\delta$  3.48 (s, 9H), 6.68 (d,  $J = 8.3$  Hz, 1H), 6.96 (d,  $J = 8.4$  Hz, 1H), 7.22–7.25 (m, 2H), 7.33 (t,  $J = 7.0$  Hz, 1H), 7.52 (t,  $J = 7.0$  Hz, 1H), 7.80–7.90 (m, 4H), 8.03 (d,  $J = 9.6$  Hz, 1H), 8.06 (d,  $J = 9.5$  Hz, 1H), 8.43 (br s, 1H);  $^{13}\text{C}$  NMR (150 MHz,  $\text{CDCl}_3$ )  $\delta$  58.3, 114.5, 118.3, 119.1, 123.9, 127.2, 127.9, 127.9, 127.9, 128.3, 128.4, 128.6, 128.8, 131.4, 131.7, 133.2, 133.7, 133.8, 142.6, 152.5; IR (KBr) 3398, 3153, 3067, 3018, 1622, 1508, 1494, 1477, 1433, 1342, 1271, 974, 935, 916, 893, 820, 751  $\text{cm}^{-1}$ ; HRMS (FAB, nitrobenzyl alcohol) calcd for  $\text{C}_{23}\text{H}_{22}\text{NO}$  328.1701, found 328.1703 ( $\text{M} - \text{I}$ ).

**(*R*)-1-(2-Trimethylammonio-1-naphthyl)-2-naphtholate (8).** A mixture of **26** (455 mg, 1.00 mmol) and  $\text{K}_2\text{CO}_3$  (166 mg, 1.20 mmol) in dry MeCN (5 mL) under  $\text{N}_2$  was stirred at room temperature for 5 h. After filtration and concentration, the product was washed with  $\text{Et}_2\text{O}$  to give **8** as a yellow powder (304 mg, 93%): mp 124–125.5  $^\circ\text{C}$ ;  $^1\text{H}$  NMR (600 MHz,  $\text{CDCl}_3$ )  $\delta$  3.39 (s, 9H), 6.41 (d,  $J = 8.4$  Hz, 1H), 7.07 (ddd,  $J = 1.2, 6.6, 7.8$  Hz, 1H), 7.10–7.15 (m, 3H), 7.24 (ddd,  $J = 1.2, 7.2, 8.4$  Hz, 1H), 7.52 (ddd,  $J = 1.2, 6.6, 7.8$  Hz, 1H), 7.60 (d,  $J = 9.0$  Hz, 1H), 7.71 (d,  $J = 7.2$  Hz, 1H), 7.93–7.94 (m, 2H), 8.07 (d,  $J = 9.6$  Hz, 1H);  $^{13}\text{C}$  NMR (150 MHz,  $\text{CDCl}_3$ )  $\delta$  57.8, 113.2, 117.7, 121.2, 122.0, 122.9, 126.4, 126.8, 127.7, 128.1, 128.2, 130.2, 130.9, 131.6, 133.4, 134.5, 134.8, 142.6, 159.7; IR (KBr) 3423, 3049, 2955, 1612, 1589, 1495, 1421, 1346, 1273, 1236, 1211, 980, 939, 891, 808, 748  $\text{cm}^{-1}$ ; HRMS (FAB, nitrobenzyl alcohol) calcd for  $\text{C}_{23}\text{H}_{22}\text{NO}$  328.1701, found 328.1718 ( $\text{M} + \text{H}$ ).



### (1-I) Synthetic Procedure for Phenyltrimethylammonium Phenoxide.<sup>11</sup>

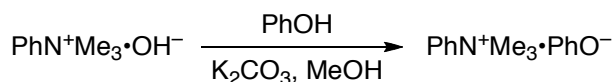

A mixture of phenyltrimethylammonium hydroxide (153 mg, 1.00 mmol), phenol (94 mg, 1.00 mmol), K<sub>2</sub>CO<sub>3</sub> (152 mg, 1.10 mmol), and molecular sieves 3A (5 pieces) in MeOH (1 mL) was stirred at room temperature for 24 h. After filtration, repeated evaporation with toluene and Et<sub>2</sub>O gave the product as a brown viscous solid (216 mg, 94%): <sup>1</sup>H NMR (600 MHz, CDCl<sub>3</sub>) δ 3.76 (s, 9H), 6.61 (t, *J* = 7.2 Hz, 1H), 6.87 (d, *J* = 7.2 Hz, 2H), 7.06–7.09 (m, 2H), 7.48–7.54 (m, 3H), 7.73 (d, *J* = 7.8 Hz, 2H); <sup>13</sup>C NMR (150 MHz, CDCl<sub>3</sub>) δ 57.0, 116.0, 117.0, 119.5, 129.3, 130.4, 130.6, 146.7, 161.8; IR (KBr) 3013, 1664, 1593, 1474, 1416, 1248, 1165, 949, 849, 762, 694 cm<sup>-1</sup>; HRMS (FAB, nitrobenzyl alcohol) calcd for C<sub>9</sub>H<sub>14</sub>N 136.1126, found 136.1129 (M – PhO).

### [2] Coupling Reaction of CO<sub>2</sub> with Epoxide.

#### General Procedure for Coupling Reaction of CO<sub>2</sub> with Epoxide.

A stainless autoclave was charged with epoxide (10 mmol), catalyst (a catalytic amount), and then CO<sub>2</sub> (initial pressure 1 MPa at room temperature). The mixture was heated with stirring at a constant temperature for a reaction time. The reactor was cooled in an ice bath for 30 min, and excess CO<sub>2</sub> was released carefully. The crude product was dissolved in Et<sub>2</sub>O, and the solution was concentrated. The NMR yield was determined by using 2-methoxynaphthalene as an internal standard. The product was purified by distillation or silica gel column chromatography.

**4-*n*-Butyl-1,3-dioxolan-2-one (10a).**<sup>12</sup> <sup>1</sup>H NMR (600 MHz, CDCl<sub>3</sub>) δ 0.93 (t, *J* = 7.2 Hz, 3H), 1.33–1.52 (m, 4H), 1.66–1.72 (m, 1H), 1.79–1.85 (m, 1H), 4.07 (dd, *J* = 7.2, 8.4 Hz, 1H), 4.52 (t, *J* = 8.4 Hz, 1H), 4.68–4.72 (m, 1H); <sup>13</sup>C NMR (150 MHz, CDCl<sub>3</sub>) δ 13.7, 22.1, 26.3, 33.4, 69.3, 77.0, 155.0; IR (neat) 2953, 2934, 2874, 1794, 1553, 1483, 1468, 1387, 1175, 1124, 1067, 775, 718 cm<sup>-1</sup>.

**4-Methyl-1,3-dioxolan-2-one (10b).**<sup>12</sup> <sup>1</sup>H NMR (600 MHz, CDCl<sub>3</sub>) δ 1.50 (d, *J* = 6.6 Hz, 3H), 4.03 (dd, *J* = 7.2, 8.4 Hz, 1H), 4.55 (dd, *J* = 7.8, 8.4 Hz, 1H), 4.83–4.88 (m, 1H); <sup>13</sup>C NMR (150 MHz, CDCl<sub>3</sub>) δ 19.3, 70.6, 73.5, 155.0; IR (neat) 2990, 2924, 1790, 1556, 1485, 1456, 1387, 1354, 1182, 1120, 1051, 851, 777, 712 cm<sup>-1</sup>.

**4-*n*-Octyl-1,3-dioxolan-2-one (10c).**<sup>13</sup> <sup>1</sup>H NMR (600 MHz, CDCl<sub>3</sub>) δ 0.88 (t, *J* = 7.2 Hz, 3H), 1.26–1.39 (m, 11H), 1.45–1.50 (m, 1H), 1.65–1.71 (m, 1H), 1.78–1.83 (m, 1H), 4.07 (dd, *J* =

7.2, 8.4 Hz, 1H), 4.52 (dd,  $J = 7.8, 8.4$  Hz, 1H), 4.70 (dq,  $J = 5.4, 7.8$  Hz, 1H);  $^{13}\text{C}$  NMR (150 MHz,  $\text{CDCl}_3$ )  $\delta$  14.0, 22.6, 24.3, 29.0, 29.1, 29.2, 31.7, 33.8, 69.4, 77.0, 155.1; IR (neat) 2928, 2855, 1801, 1466, 1385, 1169, 1065, 775, 721  $\text{cm}^{-1}$ .

**4-Methoxymethyl-1,3-dioxolan-2-one (10d).**<sup>12</sup>  $^1\text{H}$  NMR (600 MHz,  $\text{CDCl}_3$ )  $\delta$  3.42 (s, 3H), 3.57 (dd,  $J = 3.6, 10.8$  Hz, 1H), 3.64 (dd,  $J = 3.6, 10.8$  Hz, 1H), 4.38 (dd,  $J = 6.0, 8.4$  Hz, 1H), 4.49 (t,  $J = 8.4$  Hz, 1H), 4.78–4.82 (m, 1H);  $^{13}\text{C}$  NMR (150 MHz,  $\text{CDCl}_3$ )  $\delta$  59.4, 66.0, 71.3, 75.0, 154.9; IR (neat) 2991, 2934, 2897, 2822, 1794, 1481, 1398, 1175, 1132, 1103, 1084, 1074, 1047, 775, 714  $\text{cm}^{-1}$ .

**4-Phenyl-1,3-dioxolan-2-one (10e).**<sup>12</sup>  $^1\text{H}$  NMR (600 MHz,  $\text{CDCl}_3$ )  $\delta$  4.35 (t,  $J = 8.4$  Hz, 1H), 4.80 (t,  $J = 8.4$  Hz, 1H), 5.68 (t,  $J = 8.4$  Hz, 1H), 7.36–7.38 (m, 2H), 7.43–7.47 (m, 3H);  $^{13}\text{C}$  NMR (150 MHz,  $\text{CDCl}_3$ )  $\delta$  71.1, 77.9, 125.8, 129.1, 129.6, 135.7, 154.8; IR (KBr) 2976, 2922, 1778, 1460, 1358, 1327, 1169, 1055, 760, 700  $\text{cm}^{-1}$ .

**4-Chloromethyl-1,3-dioxolan-2-one (10f).**<sup>12</sup>  $^1\text{H}$  NMR (600 MHz,  $\text{CDCl}_3$ )  $\delta$  3.70–3.78 (m, 2H), 4.42 (dd,  $J = 6.0, 9.0$  Hz, 1H), 4.59 (dd,  $J = 8.4, 9.0$  Hz, 1H), 4.94–4.98 (m, 1H);  $^{13}\text{C}$  NMR (150 MHz,  $\text{CDCl}_3$ )  $\delta$  43.8, 66.8, 74.3, 154.3; IR (neat) 3221, 2984, 2968, 1794, 1481, 1431, 1396, 1356, 1335, 1167, 1072, 1045, 768, 718, 664  $\text{cm}^{-1}$ .

### [3] Synthesis of Betaine–CO<sub>2</sub> Adduct and Subsequent Reaction with Epoxide.

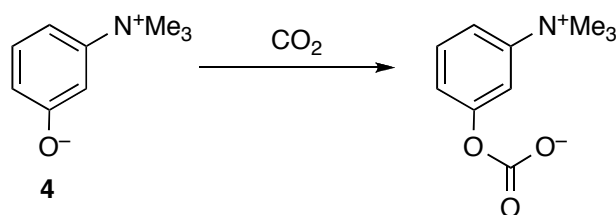

A 30-mL stainless autoclave was charged with **4** (151 mg, 1.00 mmol) and CO<sub>2</sub> (initial pressure 1 MPa). The mixture was stirred at a constant temperature for 24 h. Excess CO<sub>2</sub> was released carefully to give a **4**–CO<sub>2</sub> adduct as a white powder: <sup>1</sup>H NMR (600 MHz, DMSO-*d*<sub>6</sub>) δ 3.48 (s, 9H), 6.71 (d, *J* = 8.2 Hz, 1H), 6.92 (d, *J* = 8.2 Hz, 1H), 6.99 (s, 1H), 7.18 (t, *J* = 8.2 Hz, 1H); <sup>13</sup>C NMR (150 MHz, methanol-*d*<sub>4</sub>) δ 57.9, 108.7, 109.8, 119.2, 132.1, 149.6, 161.2, 162.7; IR (KBr) 3013, 1655, 1609, 1497, 1470, 1412, 1219, 945, 918, 837 cm<sup>−1</sup>.

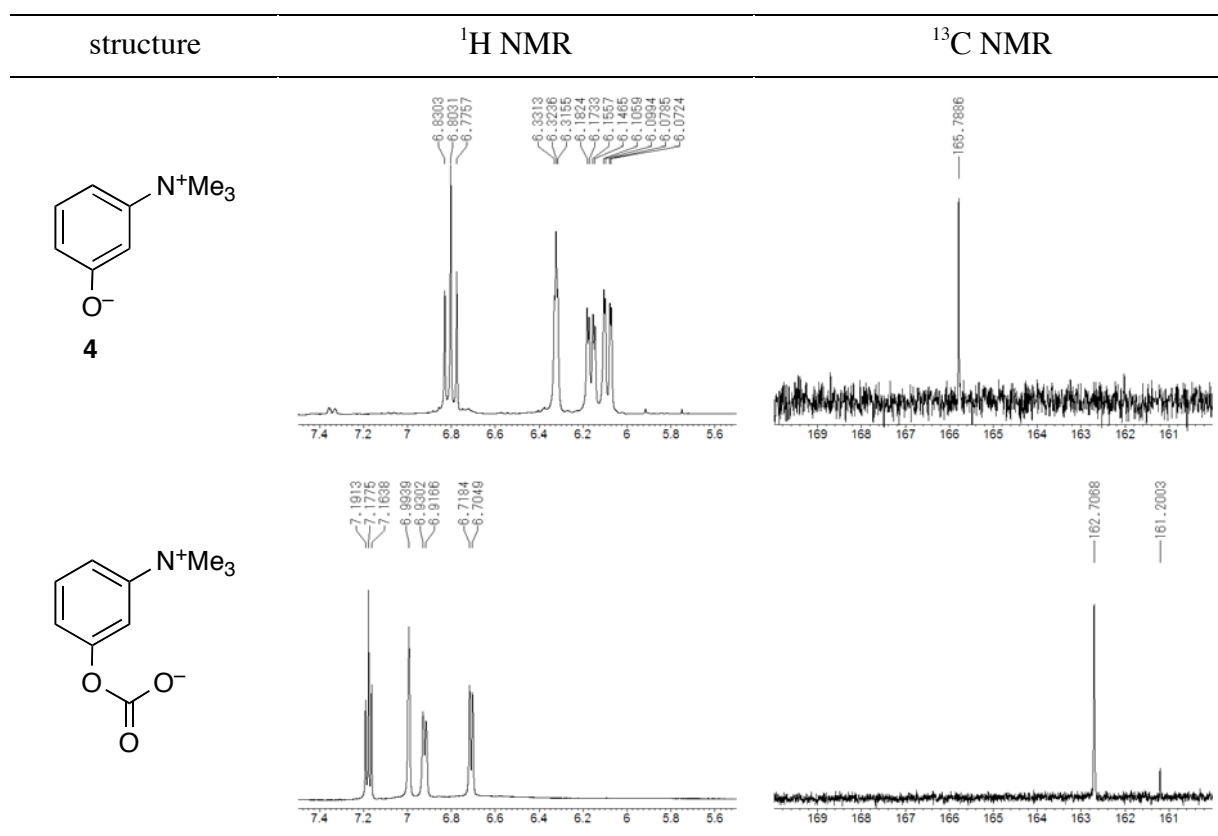

**Figure S1.** Selected Regions of <sup>1</sup>H NMR (600 MHz, DMSO-*d*<sub>6</sub>) and <sup>13</sup>C NMR (150 MHz, methanol-*d*<sub>4</sub>) Spectra of **4** and its CO<sub>2</sub>-adduct.

The **4**–CO<sub>2</sub> adduct was allowed to react with **9a** (1.21 mL, 10.0 mmol) under Ar in an autoclave at 120 °C for 24 h. The reactor was then cooled in an ice bath for 30 min. The NMR yield was determined by using 2-methoxynaphthalene as an internal standard. The results are summarized in Figure 3 in the text.

#### [4] Optimization of Reaction Conditions Using Catalyst 1.

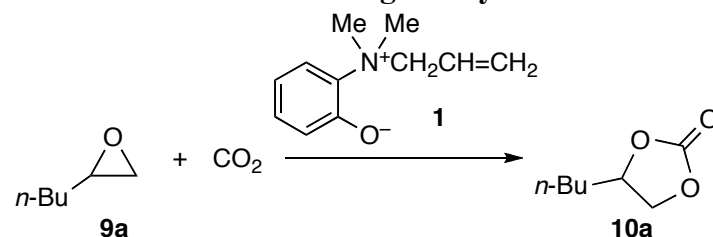

A 50-mL stainless autoclave was charged with epoxide **9a** (10 mmol), catalyst (indicated in Table S1), and then CO<sub>2</sub> (pressure indicated in Table S1). The mixture was heated with stirring at the indicated temperature for the reaction time indicated. The reactor was cooled in an ice bath for 30 min, and excess CO<sub>2</sub> was released carefully. The crude product was dissolved in Et<sub>2</sub>O, and the solution was concentrated. The NMR yield was determined by using 2-methoxynaphthalene as an internal standard.

The yield showed signs of leveling off at 0.5–2.0 MPa CO<sub>2</sub> (entries 1–4), while the yield increased with an increase in the amount of catalyst (entries 3 and 5–8). Next we changed the temperature using 3 mol % of catalyst at 1.0 MPa CO<sub>2</sub> to find that the yield reached a plateau at 130 °C (entries 3 and 9–12). When the progress of the reaction was then monitored under the optimal conditions (5 mol % of catalyst, 1.0 MPa CO<sub>2</sub>, and 130 °C), the reaction reached 99% in 48 h (entries 13–16).

**Table S1.** Optimization of Reaction Conditions Using Catalyst 1.

| entry | CO <sub>2</sub> (MPa) | loading (mol %) | temp (°C) | time (h) | yield (%) |
|-------|-----------------------|-----------------|-----------|----------|-----------|
| 1     | 0.1                   | 3               | 120       | 48       | 54        |
| 2     | 0.5                   | 3               | 120       | 48       | 76        |
| 3     | 1.0                   | 3               | 120       | 48       | 76        |
| 4     | 2.0                   | 3               | 120       | 48       | 75        |
| 5     | 1.0                   | 1               | 120       | 48       | 18        |
| 6     | 1.0                   | 2               | 120       | 48       | 60        |
| 7     | 1.0                   | 4               | 120       | 48       | 85        |
| 8     | 1.0                   | 5               | 120       | 48       | 99        |
| 9     | 1.0                   | 3               | 100       | 48       | 63        |
| 10    | 1.0                   | 3               | 110       | 48       | 77        |
| 11    | 1.0                   | 3               | 130       | 48       | 79        |
| 12    | 1.0                   | 3               | 140       | 48       | 79        |
| 13    | 1.0                   | 5               | 130       | 6        | 19        |
| 14    | 1.0                   | 5               | 130       | 12       | 65        |
| 15    | 1.0                   | 5               | 130       | 24       | 73        |
| 16    | 1.0                   | 5               | 130       | 48       | 99        |

## References

- (1) Grove, S. J. A.; Kaur, J.; Muir, A. W.; Pow, E.; Tarver, G. J.; Zhang, M.-Q. *Bioorg. Med. Chem. Lett.* **2002**, *12*, 193–196.
- (2) Ollis, W. D.; Sutherland, I. O.; Thebtaranonth, Y. *J. Chem. Soc. Perkin Trans.* **1981**, 1981–1993.
- (3) Epstein, J.; Plapinger, R. E.; Michel, H. O.; Cable, J. R.; Stephani, R. A.; Hester, R. J.; Billington, C., Jr.; List, G. R. *J. Am. Chem. Soc.* **1964**, *86*, 3075–3084.
- (4) Beringer, F. M.; Lillien, I. *J. Am. Chem. Soc.* **1960**, *82*, 5135–5140.
- (5) Ortega, P.; Copa-Patiño, J. L.; Muñoz-Fernandez, M. A.; Soliveri, J.; Gomez, R.; de la Mata, F. J. *Org. Biomol. Chem.* **2008**, *6*, 3264–3269.
- (6) Wiley, G. R.; Miller, S. I. *J. Org. Chem.* **1972**, *37*, 767–773.
- (7) Beringer, F. M.; Lillien, I. *J. Am. Chem. Soc.* **1960**, *82*, 5141–5142.
- (8) Downie, I. M.; Heaney, H.; Kemp, G.; King, D.; Wosley, M. *Tetrahedron* **1992**, *48*, 4005–4016.
- (9) Stubbs, H. W. D.; Tucker, S. H. *J. Chem. Soc.* **1954**, 227–233.
- (10) Smrčina, M.; Vyskočil, Š.; Polívková, J.; Sejbál, J.; Hanuš, V.; Polášek, M.; Verrier, H.; Kočovský, P. *Tetrahedron: Asymmetry* **1997**, *8*, 537–546.
- (11) Walsh, T. D.; Long, R. C. *J. Am. Chem. Soc.* **1967**, *89*, 3943–3944.
- (12) Sakai, T.; Tsutsumi, Y.; Ema, T. *Green Chem.* **2008**, *10*, 337–341.
- (13) Meléndez, J.; North, M.; Pasquale, R. *Eur. J. Inorg. Chem.* **2007**, 3323–3326.

[5]  $^1\text{H}$  and  $^{13}\text{C}$  NMR Spectra.

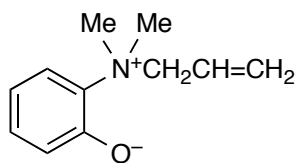

**1**

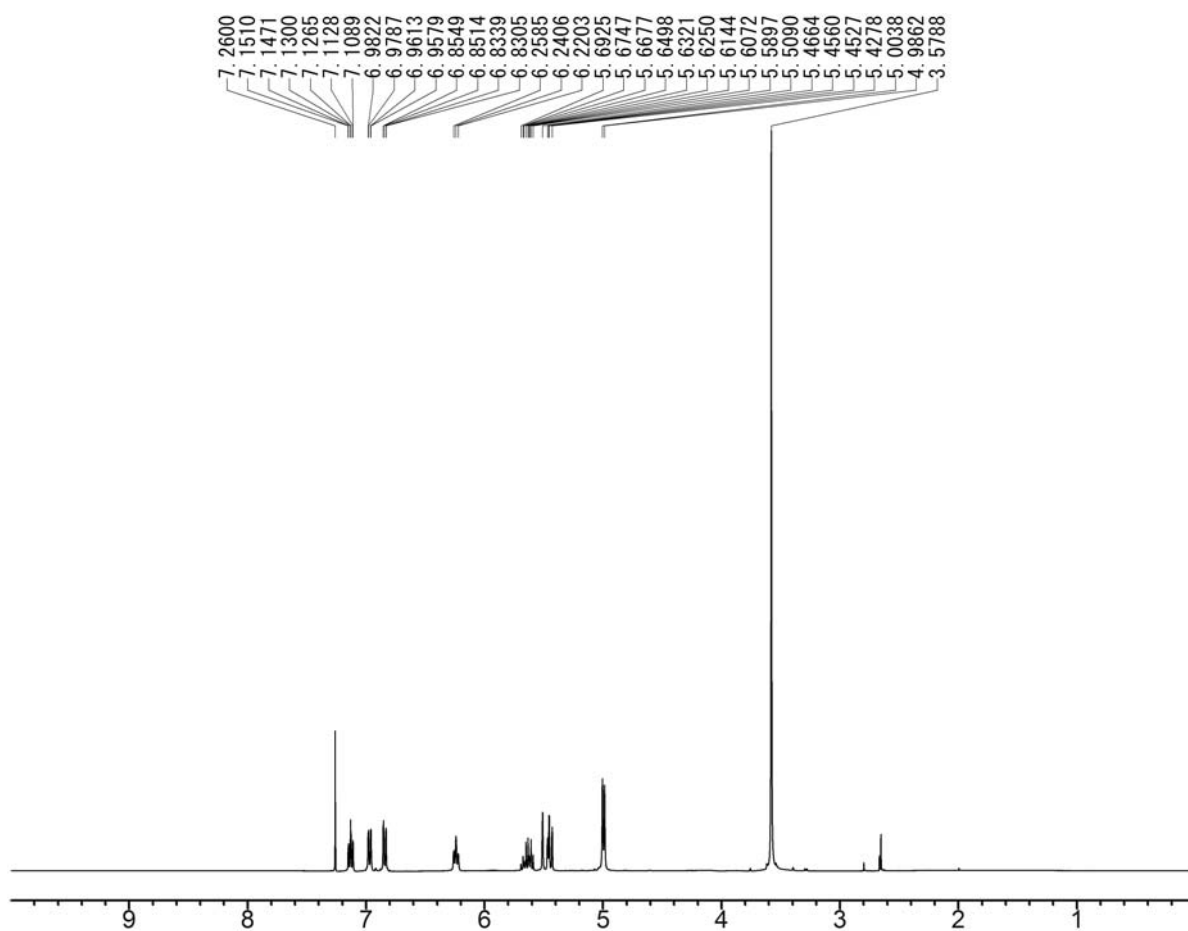

400 MHz  $^1\text{H}$  NMR of **1** in  $\text{CDCl}_3$ .

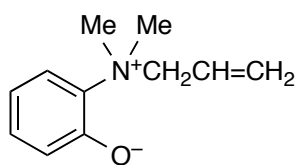

**1**

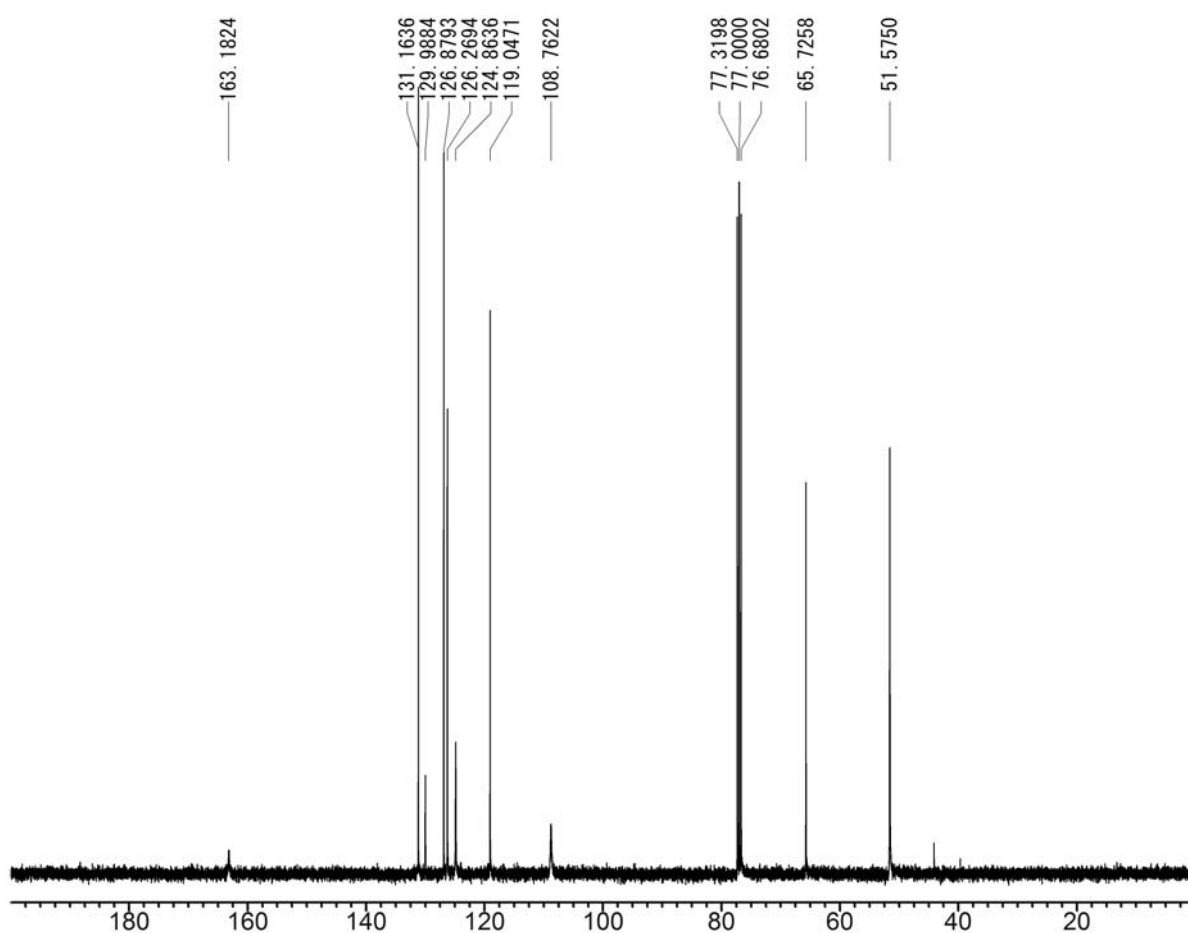

100 MHz  $^{13}\text{C}$  NMR of **1** in  $\text{CDCl}_3$ .

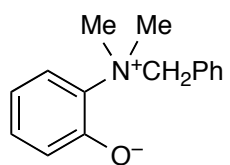

**2**

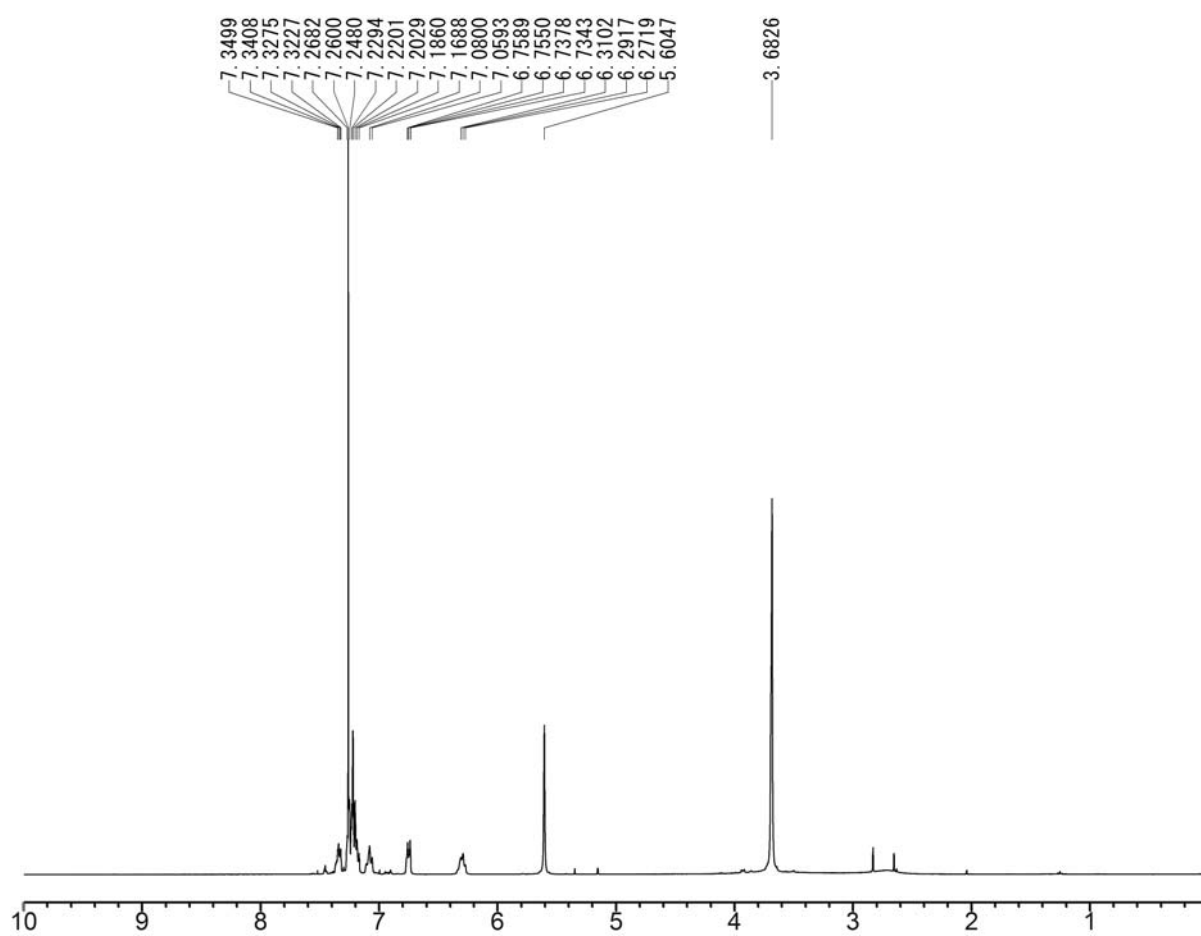

400 MHz  $^1\text{H}$  NMR of **2** in  $\text{CDCl}_3$ .



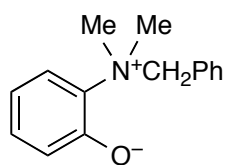

**2**

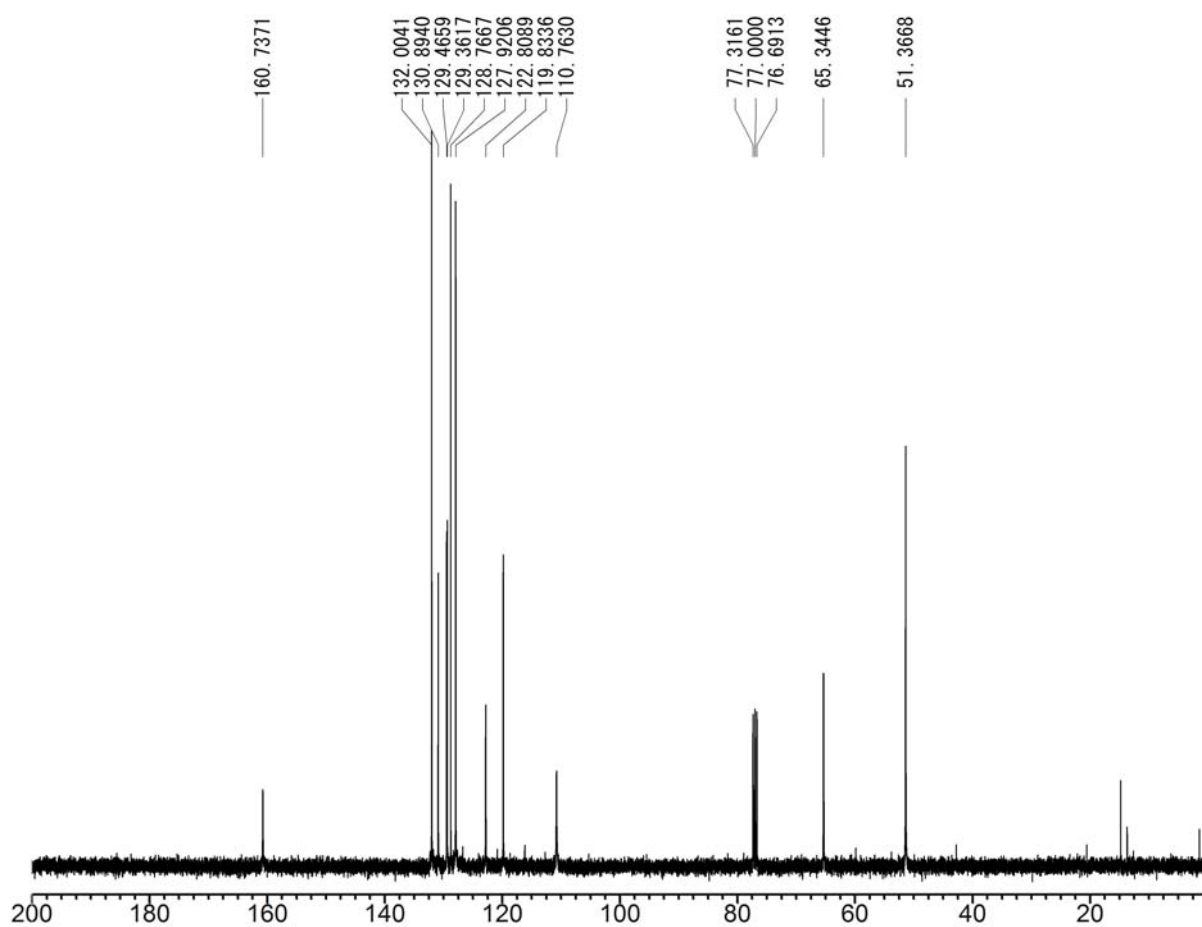

100 MHz  $^{13}\text{C}$  NMR of **2** in  $\text{CDCl}_3$ .

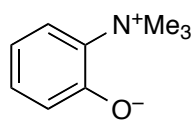

**3**

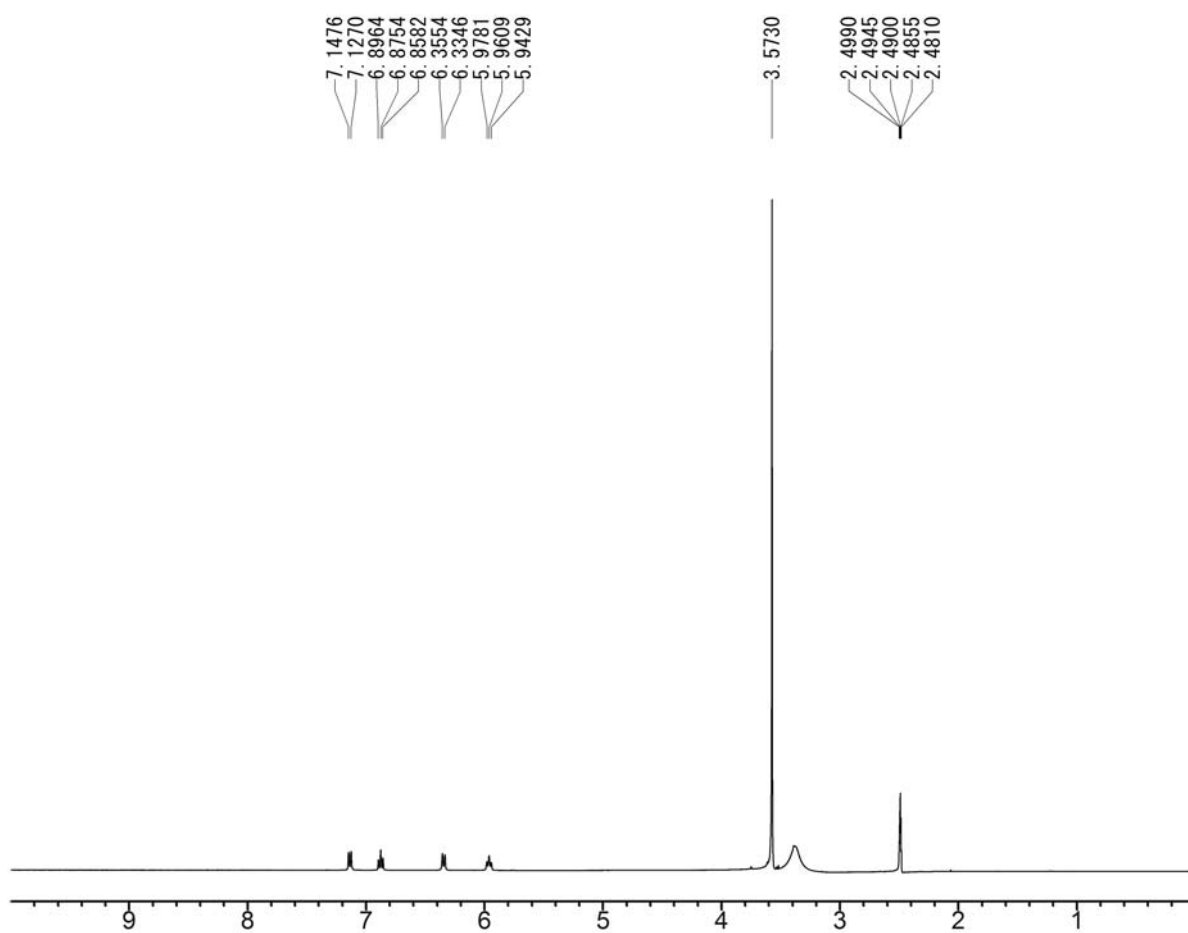

400 MHz  $^1\text{H}$  NMR of **3** in  $\text{DMSO}-d_6$ .

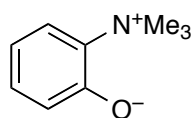

**3**

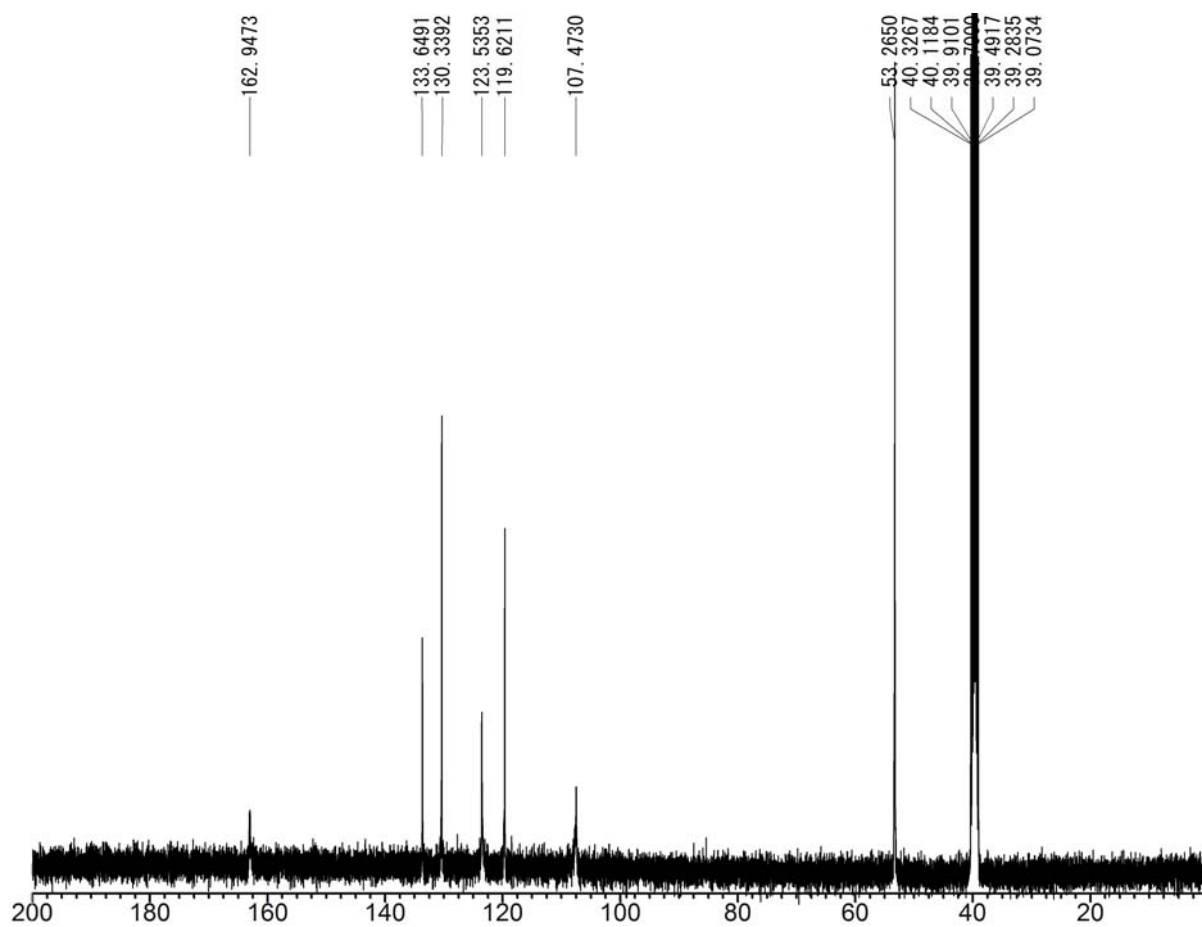

100 MHz  $^{13}\text{C}$  NMR of **3** in  $\text{DMSO-}d_6$ .

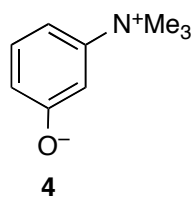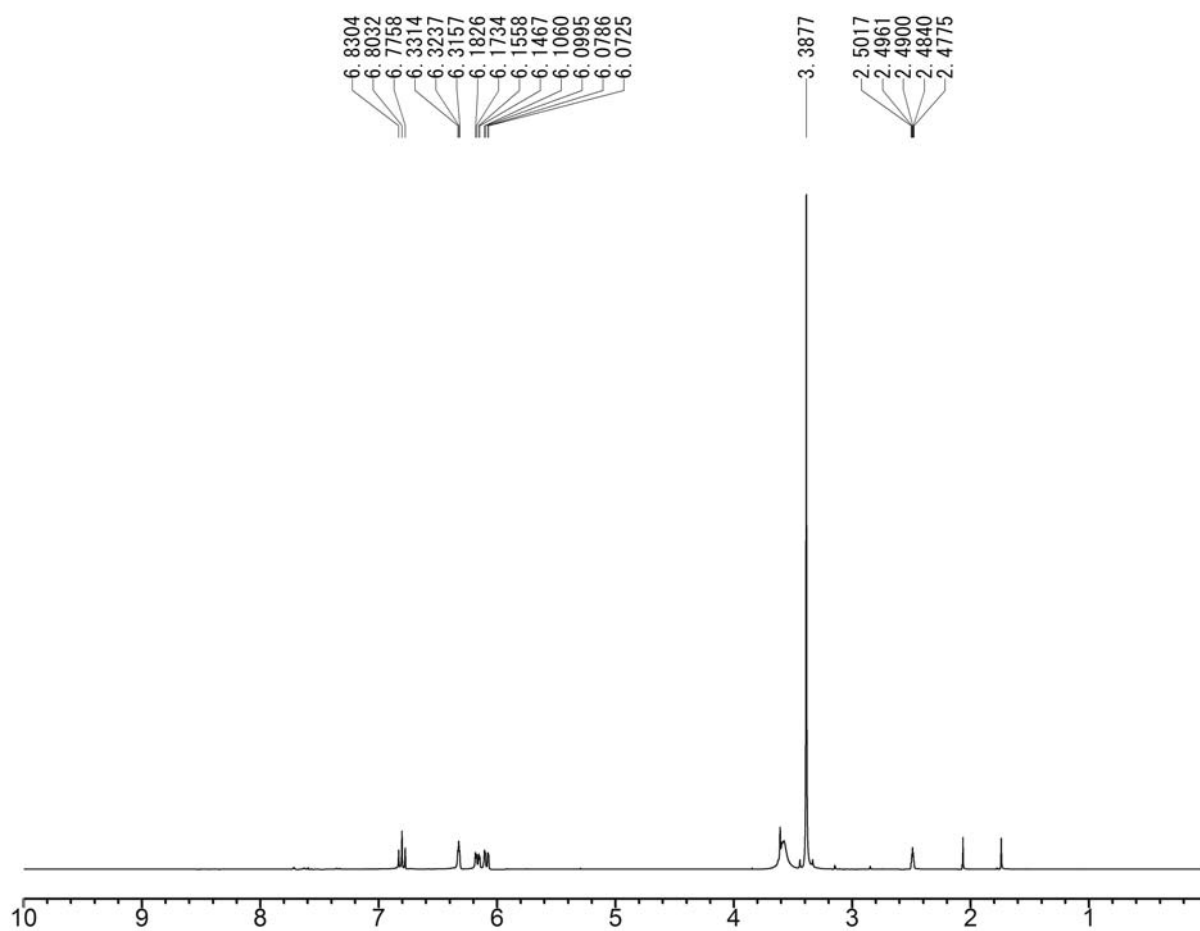

300 MHz <sup>1</sup>H NMR of **4** in DMSO-*d*<sub>6</sub>.

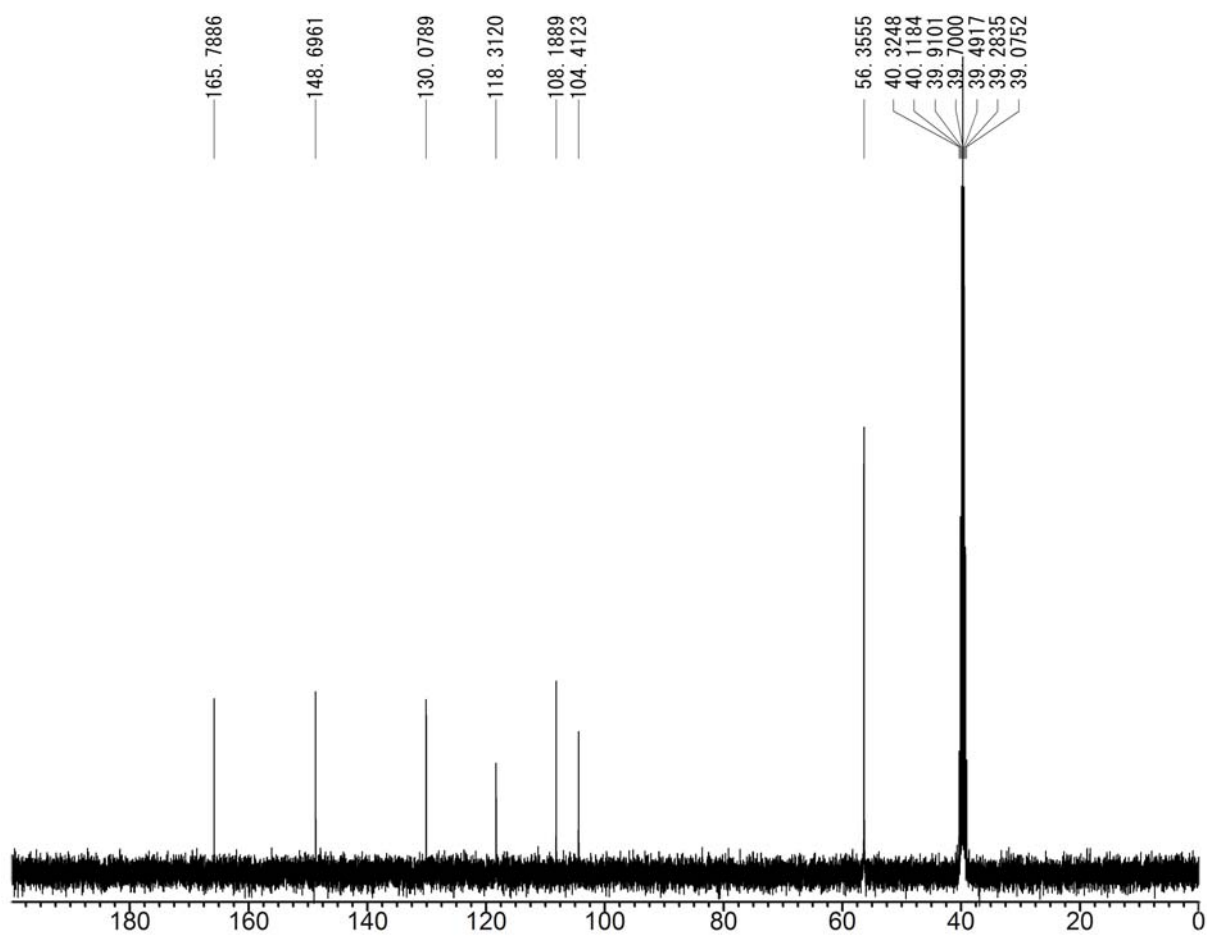

100 MHz  $^{13}\text{C}$  NMR of **4** in  $\text{DMSO}-d_6$ .

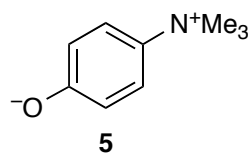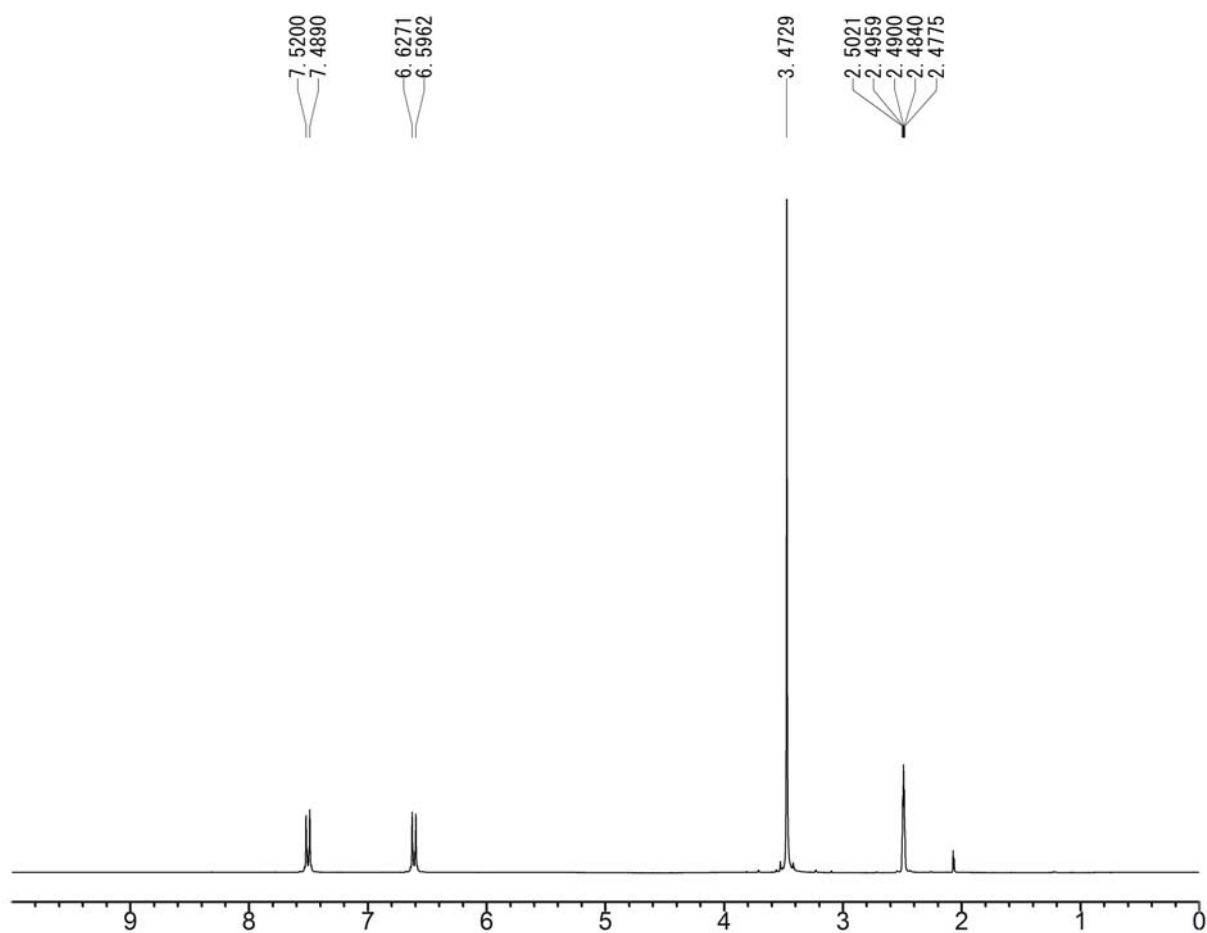

300 MHz  $^1\text{H}$  NMR of **5** in  $\text{DMSO-}d_6$ .

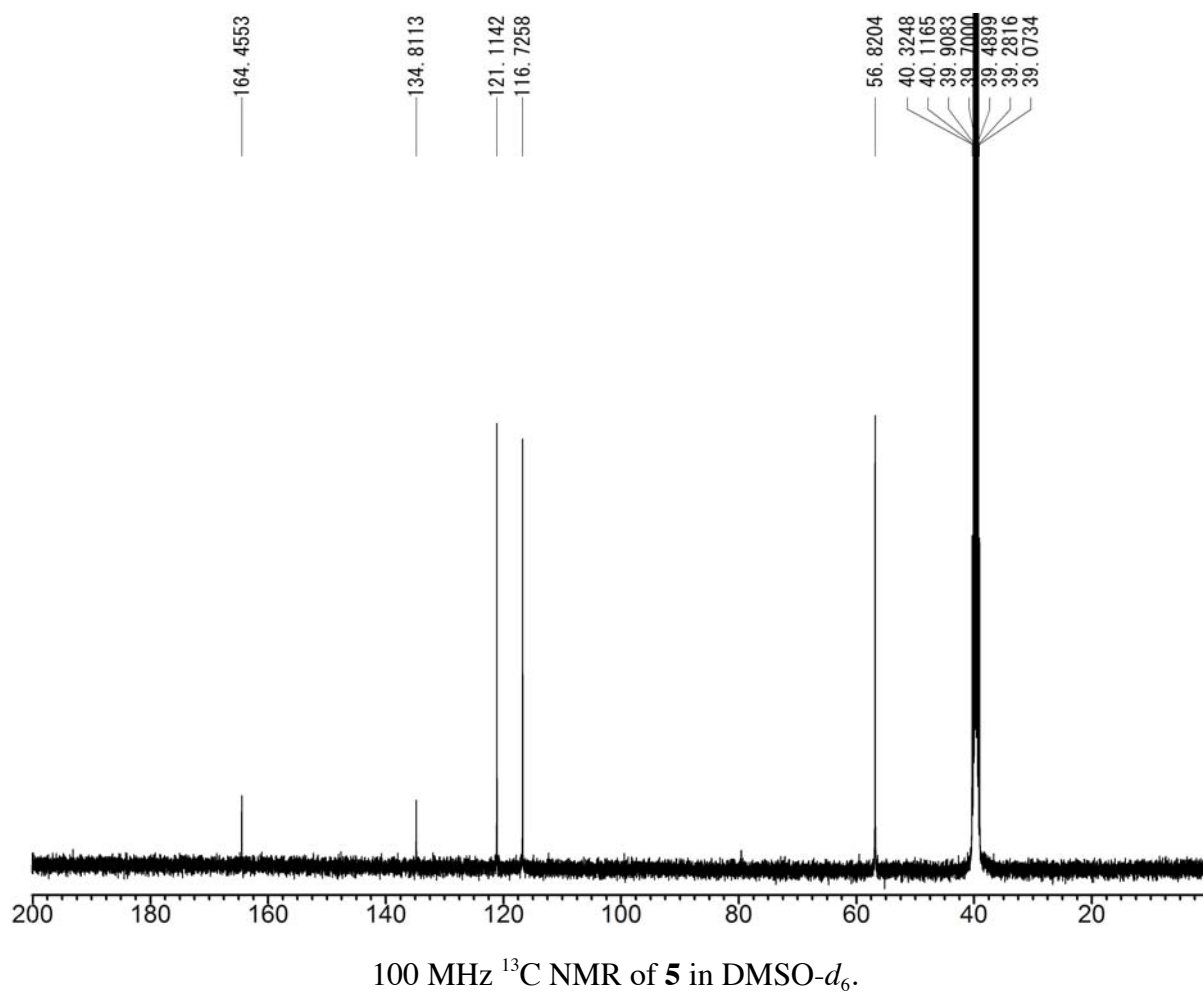

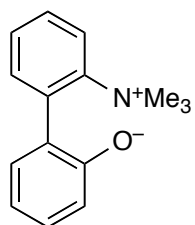

**6**

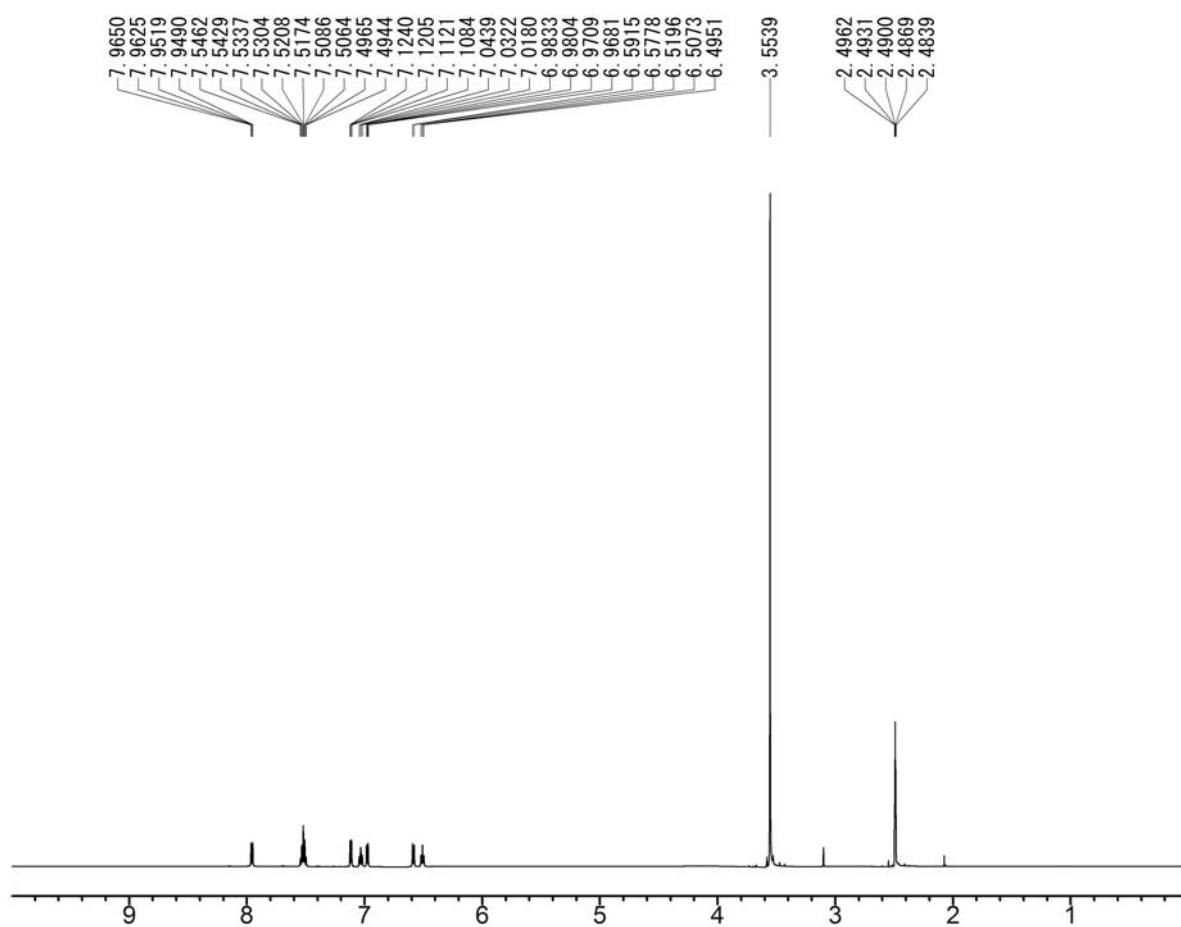

600 MHz  $^1\text{H}$  NMR of **6** in  $\text{DMSO}-d_6$ .





**6**

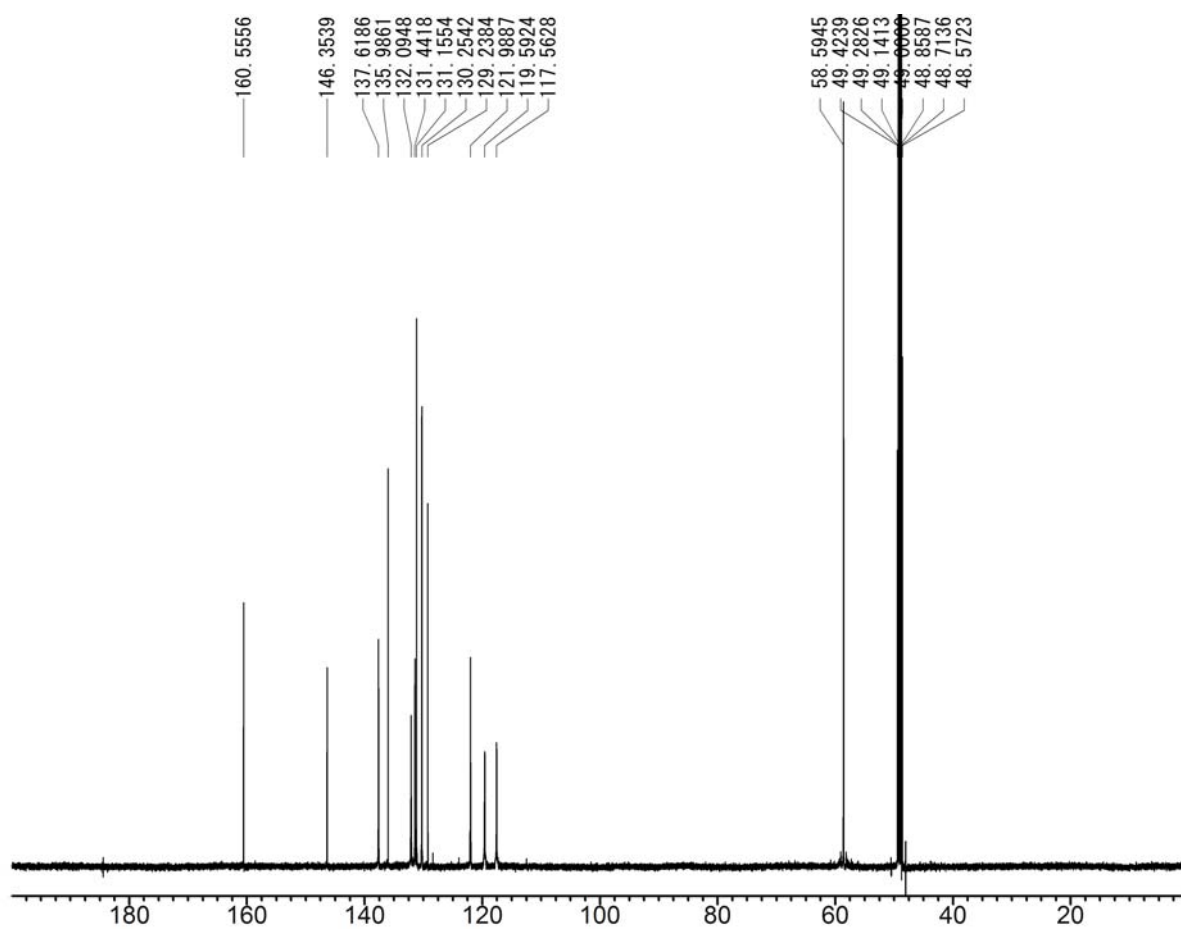

150 MHz  $^{13}\text{C}$  NMR of **6** in methanol- $d_4$ .

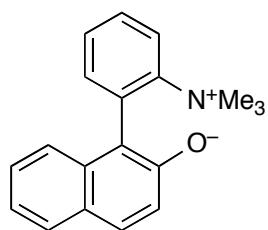

**7**

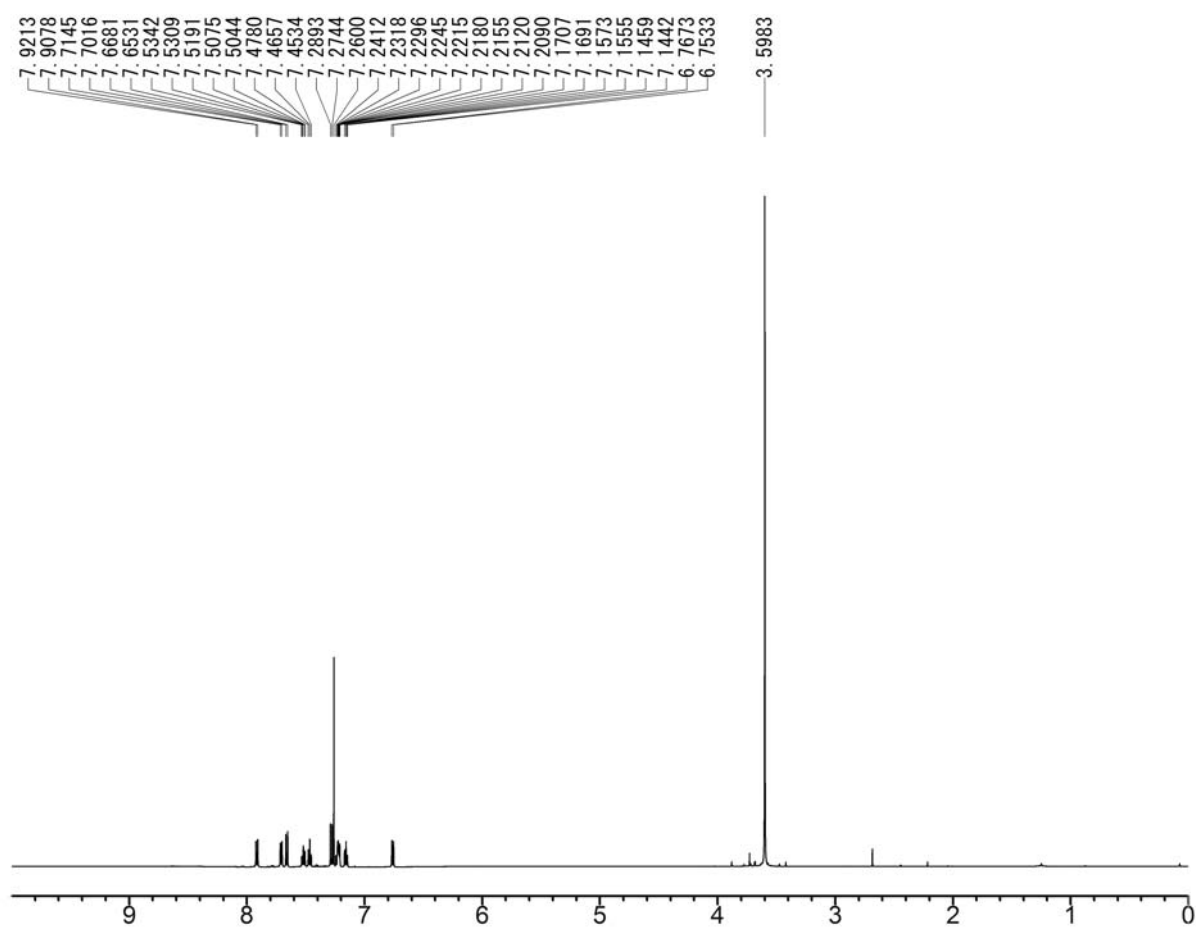

600 MHz  $^1\text{H}$  NMR of **7** in  $\text{CDCl}_3$ .



**7**

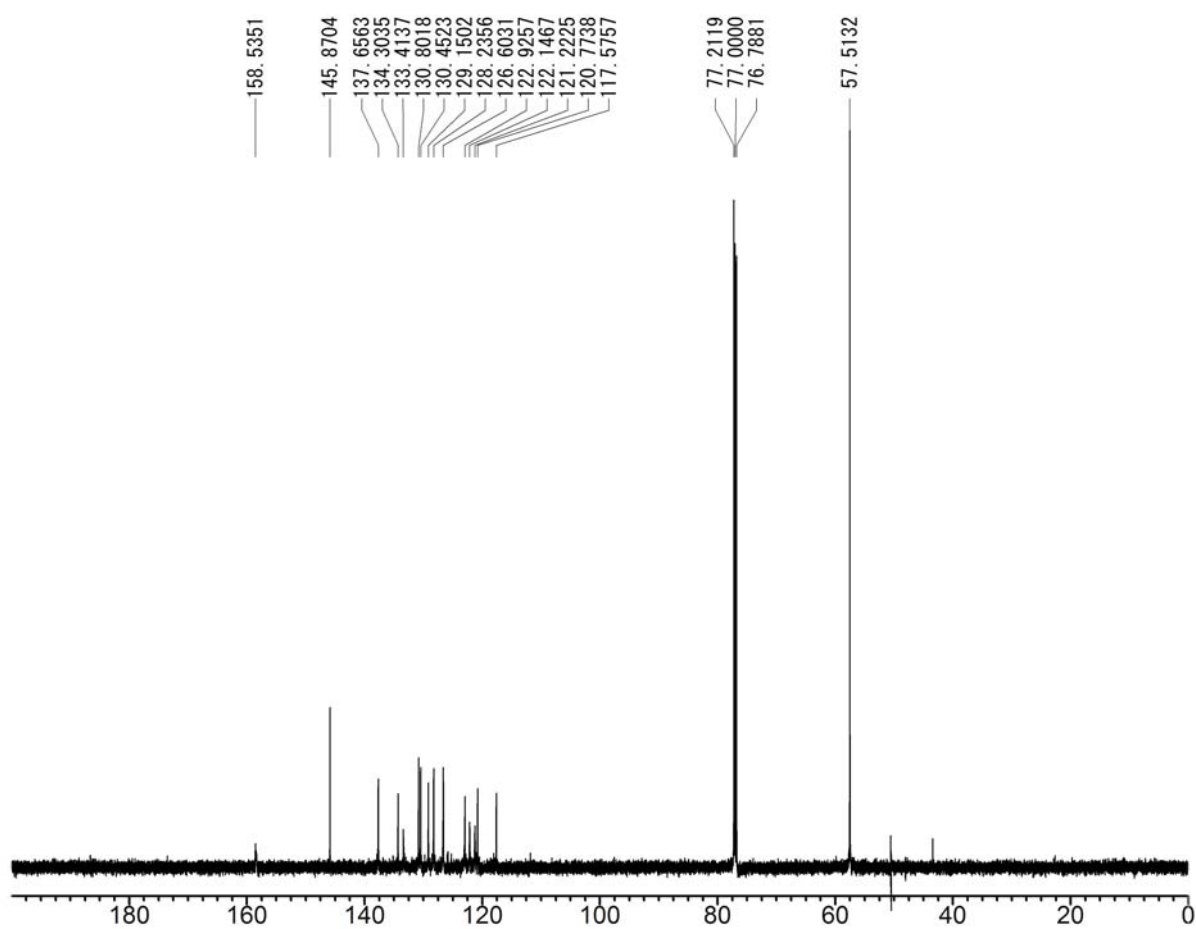

150 MHz  $^{13}\text{C}$  NMR of **7** in  $\text{CDCl}_3$ .

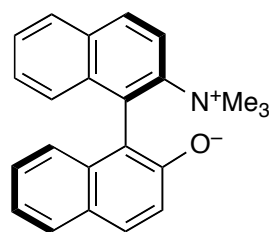

**8**

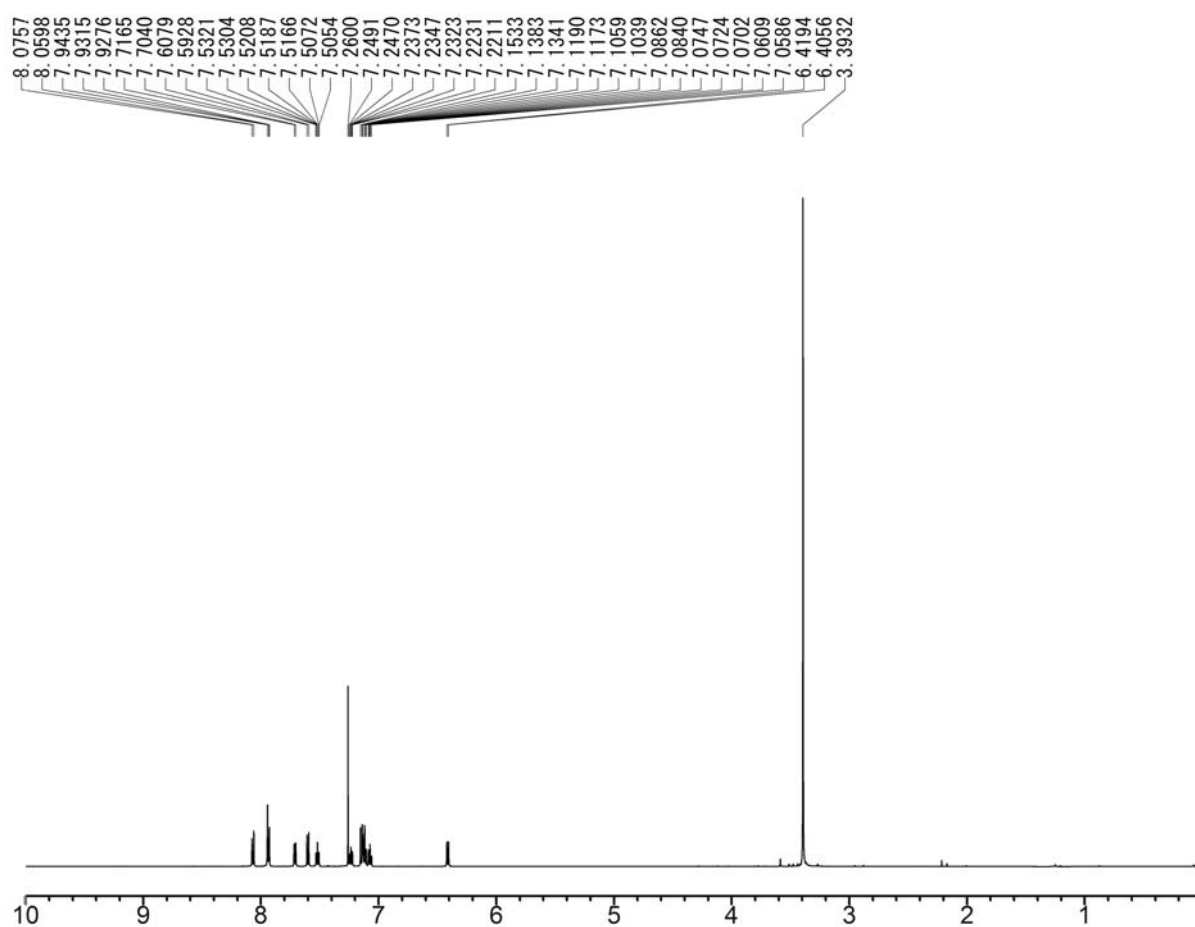

600 MHz  $^1\text{H}$  NMR of **8** in  $\text{CDCl}_3$ .

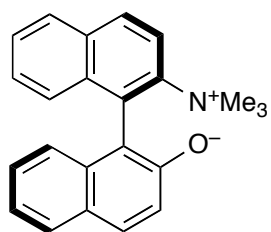

**8**

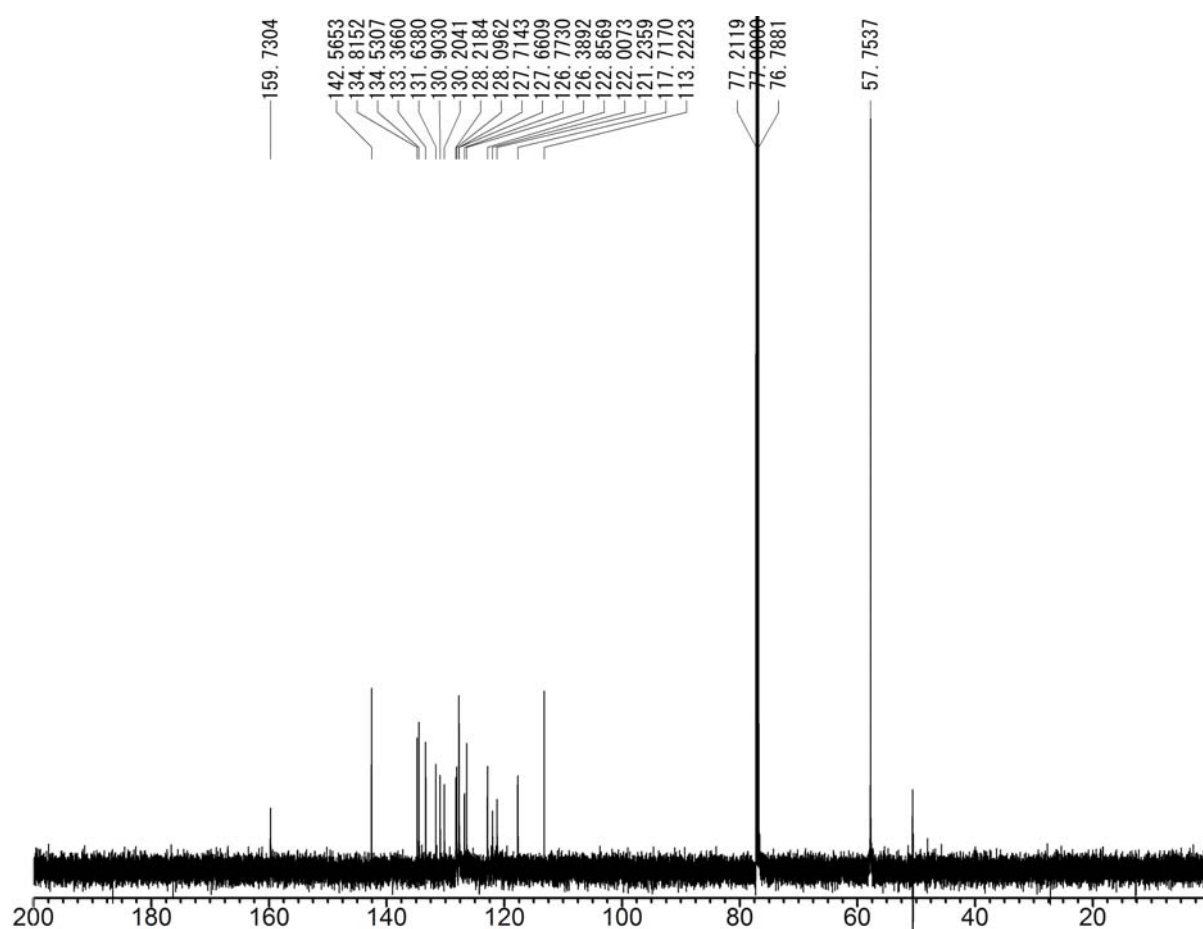

150 MHz  $^{13}\text{C}$  NMR of **8** in  $\text{CDCl}_3$ .

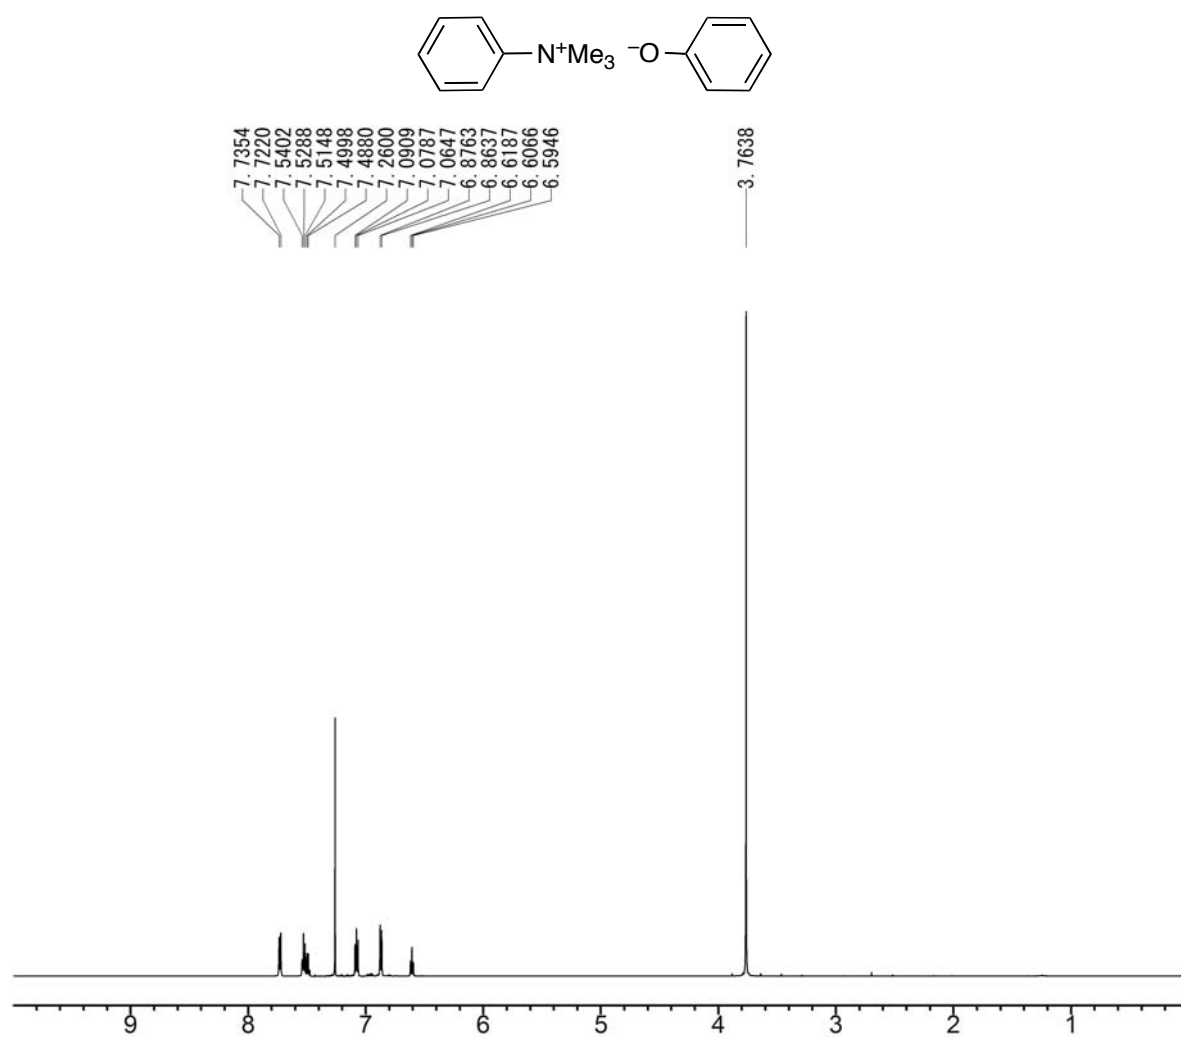

600 MHz <sup>1</sup>H NMR of phenyltrimethylammonium phenoxide in CDCl<sub>3</sub>.

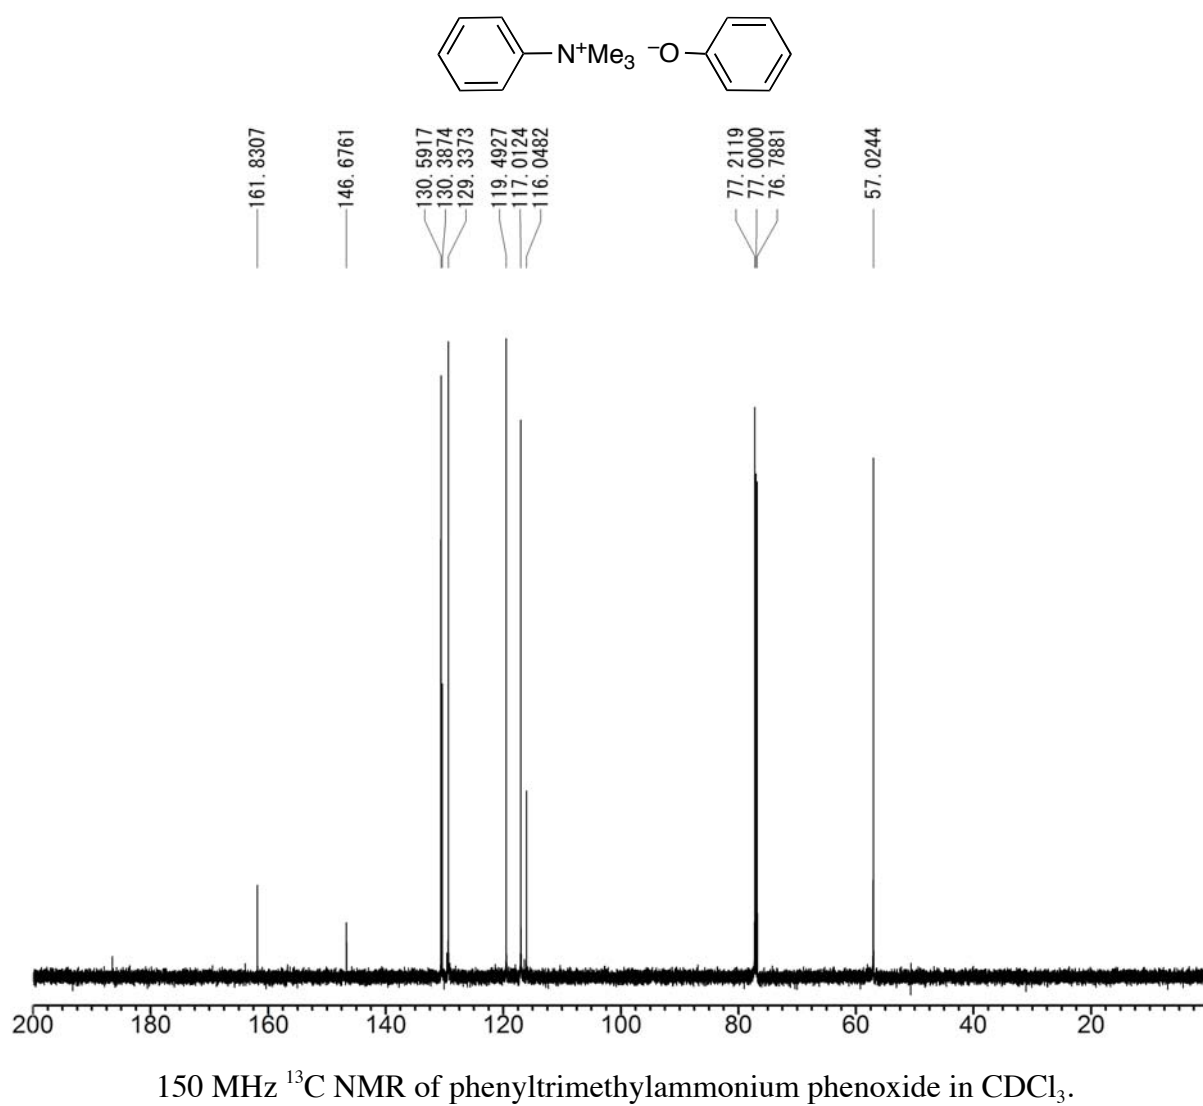

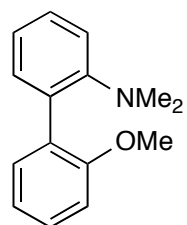

**17**

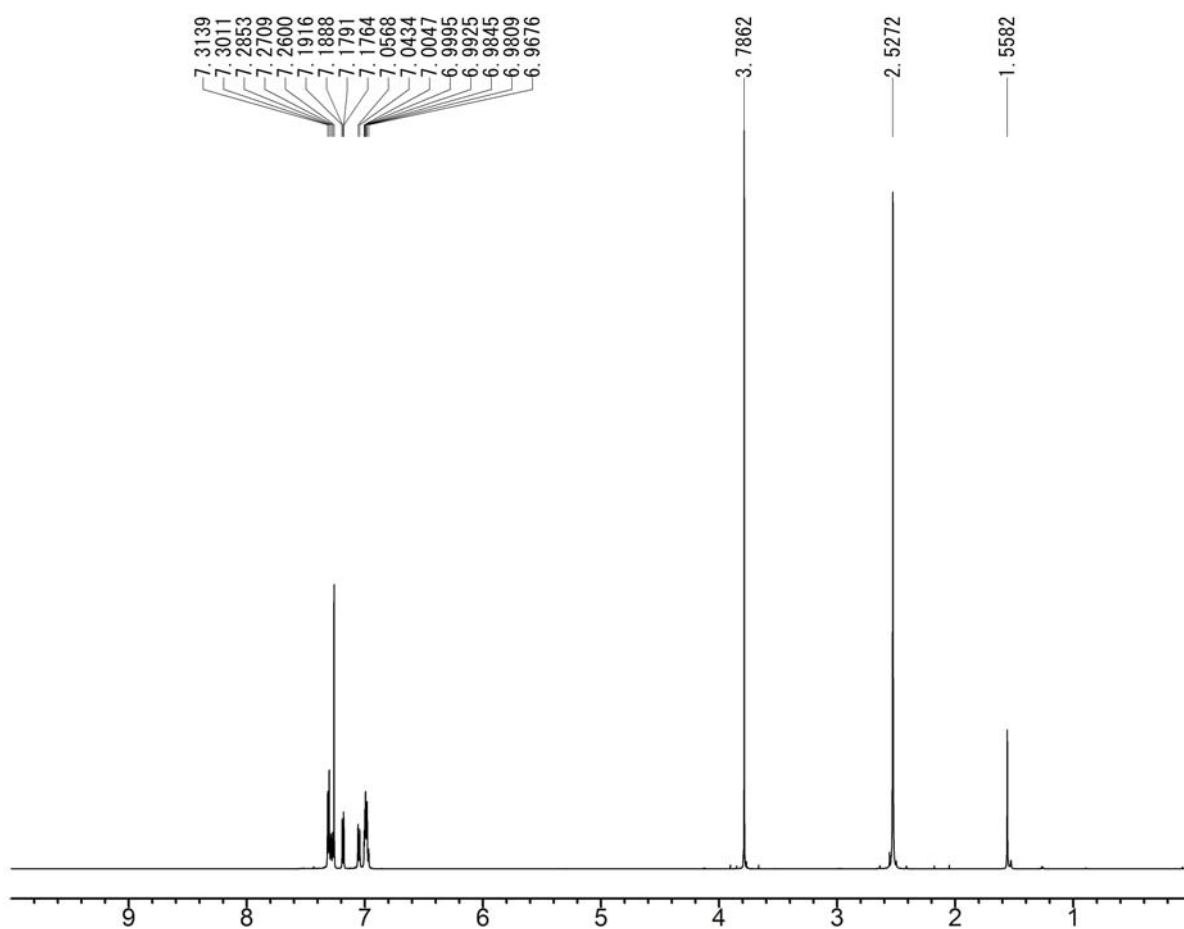

600 MHz  $^1\text{H}$  NMR of **17** in  $\text{CDCl}_3$ .



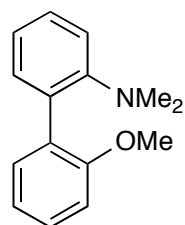

**17**

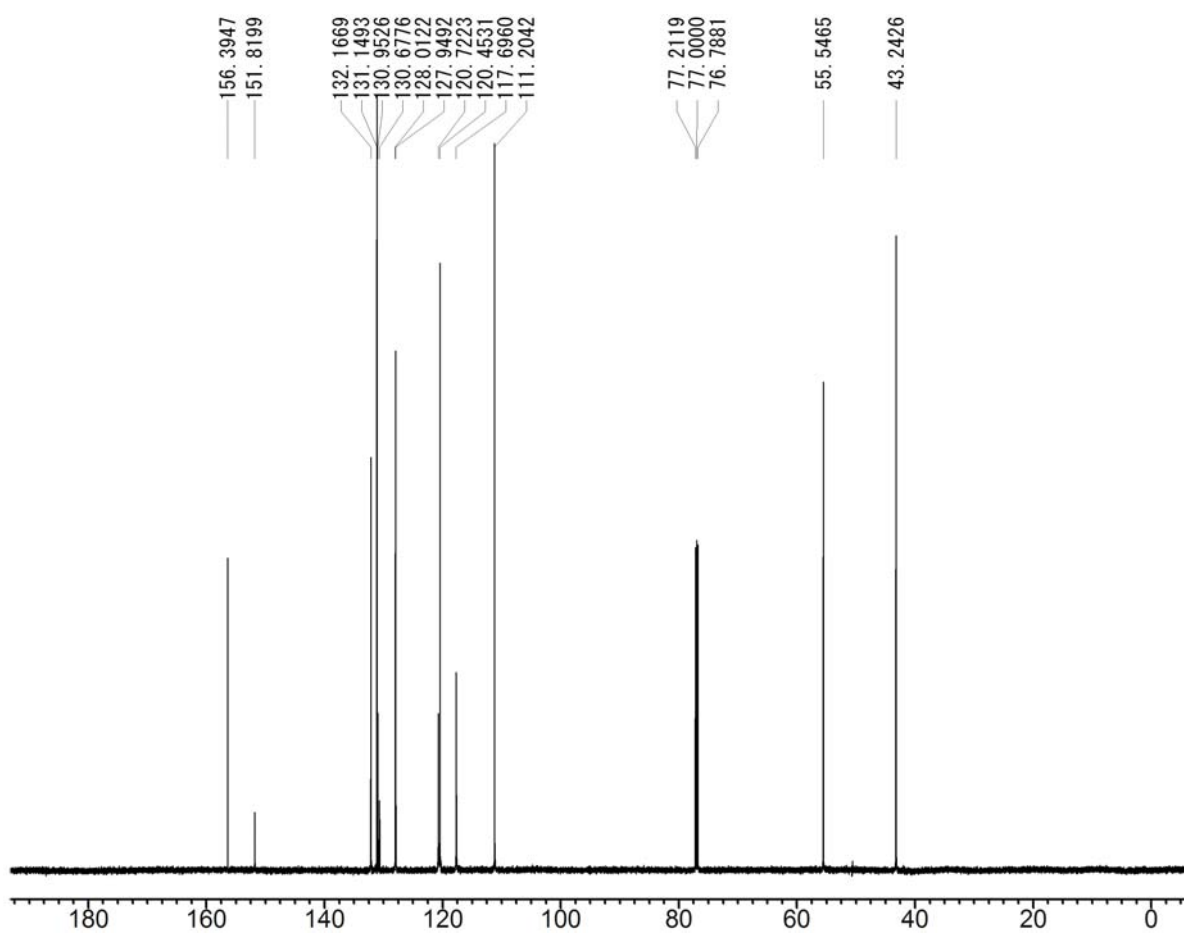

150 MHz  $^{13}\text{C}$  NMR of **17** in  $\text{CDCl}_3$ .

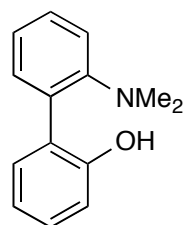

**18**

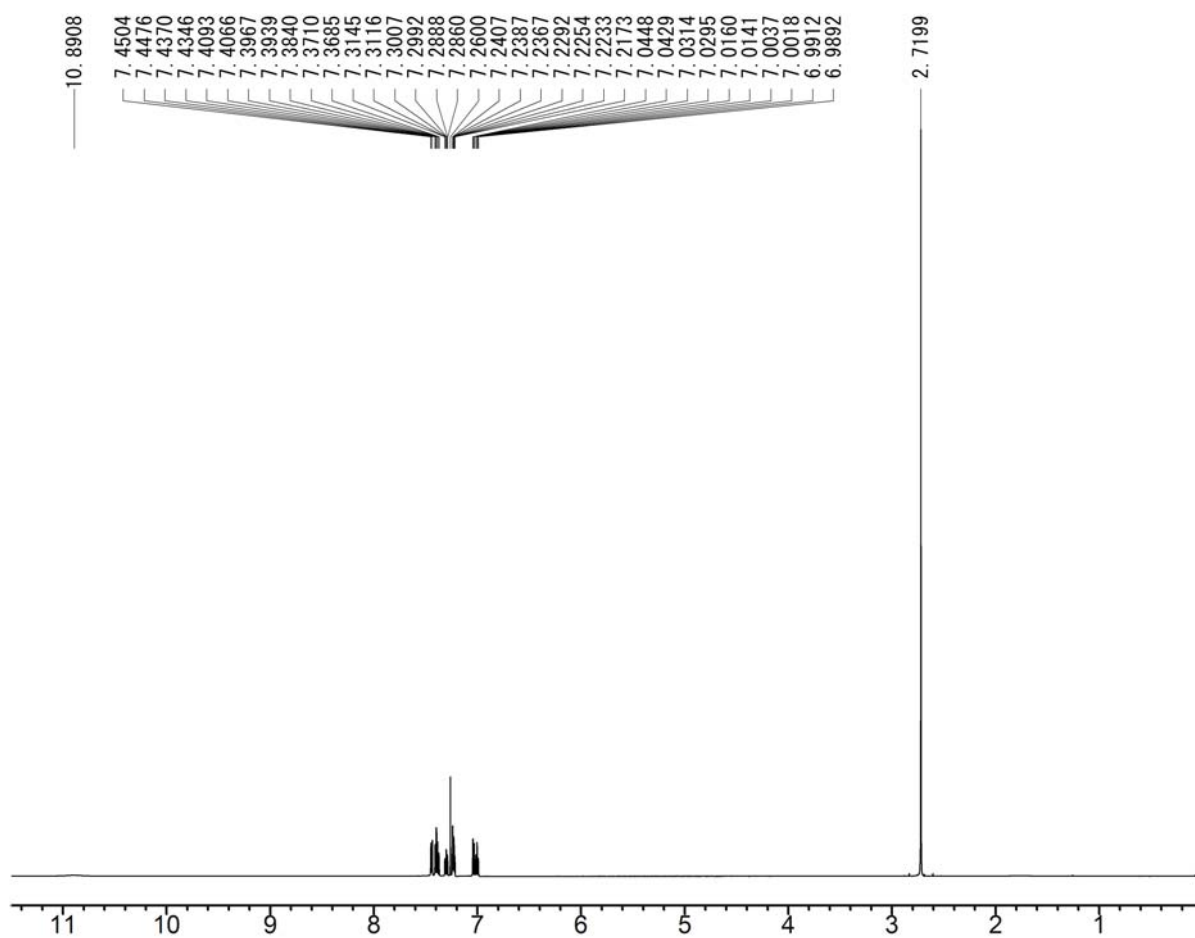

600 MHz  $^1\text{H}$  NMR of **18** in  $\text{CDCl}_3$ .

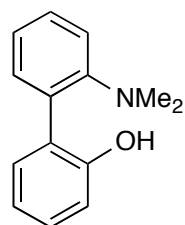

**18**

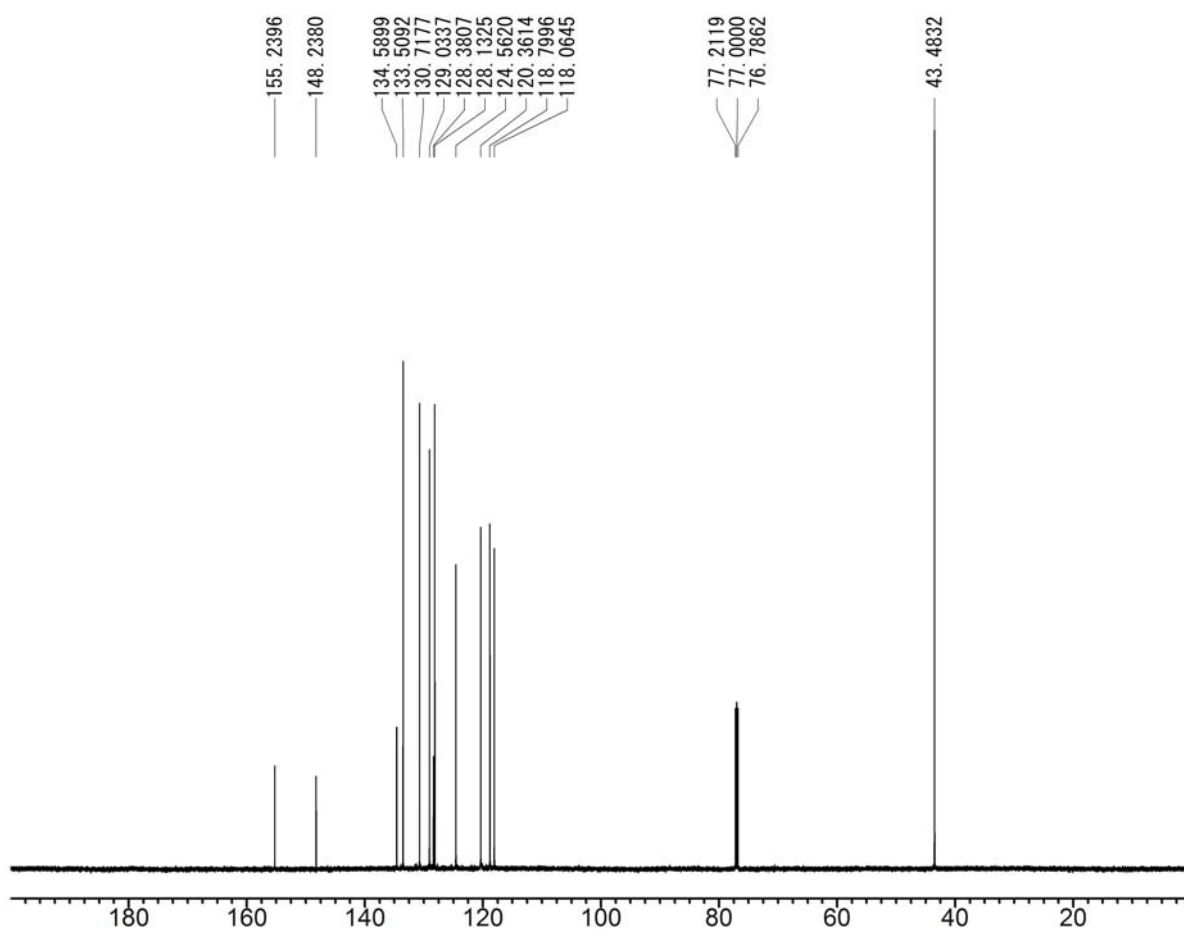

150 MHz  $^{13}\text{C}$  NMR of **18** in  $\text{CDCl}_3$ .

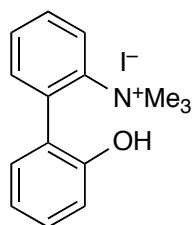

**19**

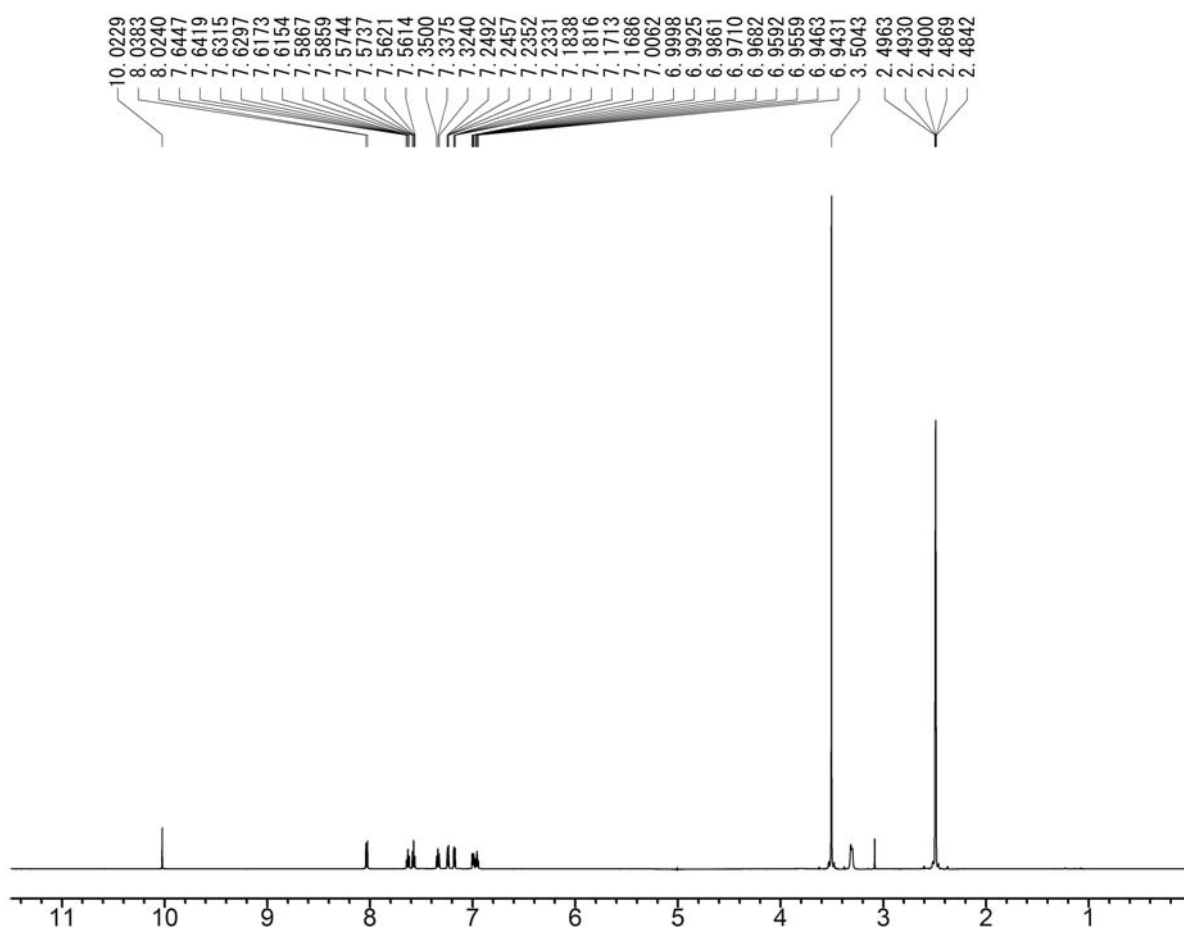

600 MHz  $^1\text{H}$  NMR of **19** in  $\text{DMSO}-d_6$ .



**19**

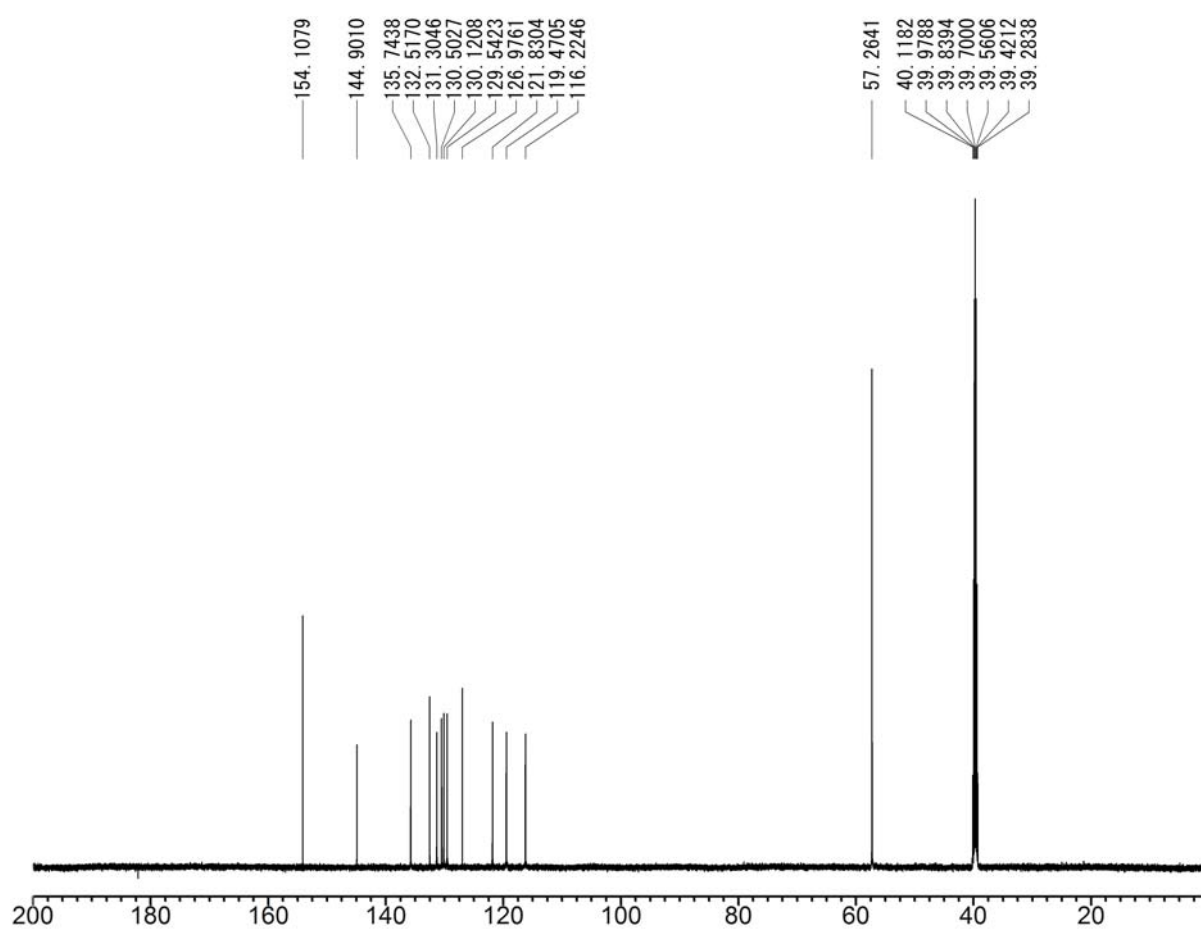

150 MHz  $^{13}\text{C}$  NMR of **19** in  $\text{DMSO}-d_6$ .

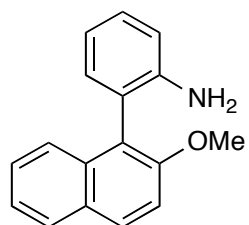

**21**

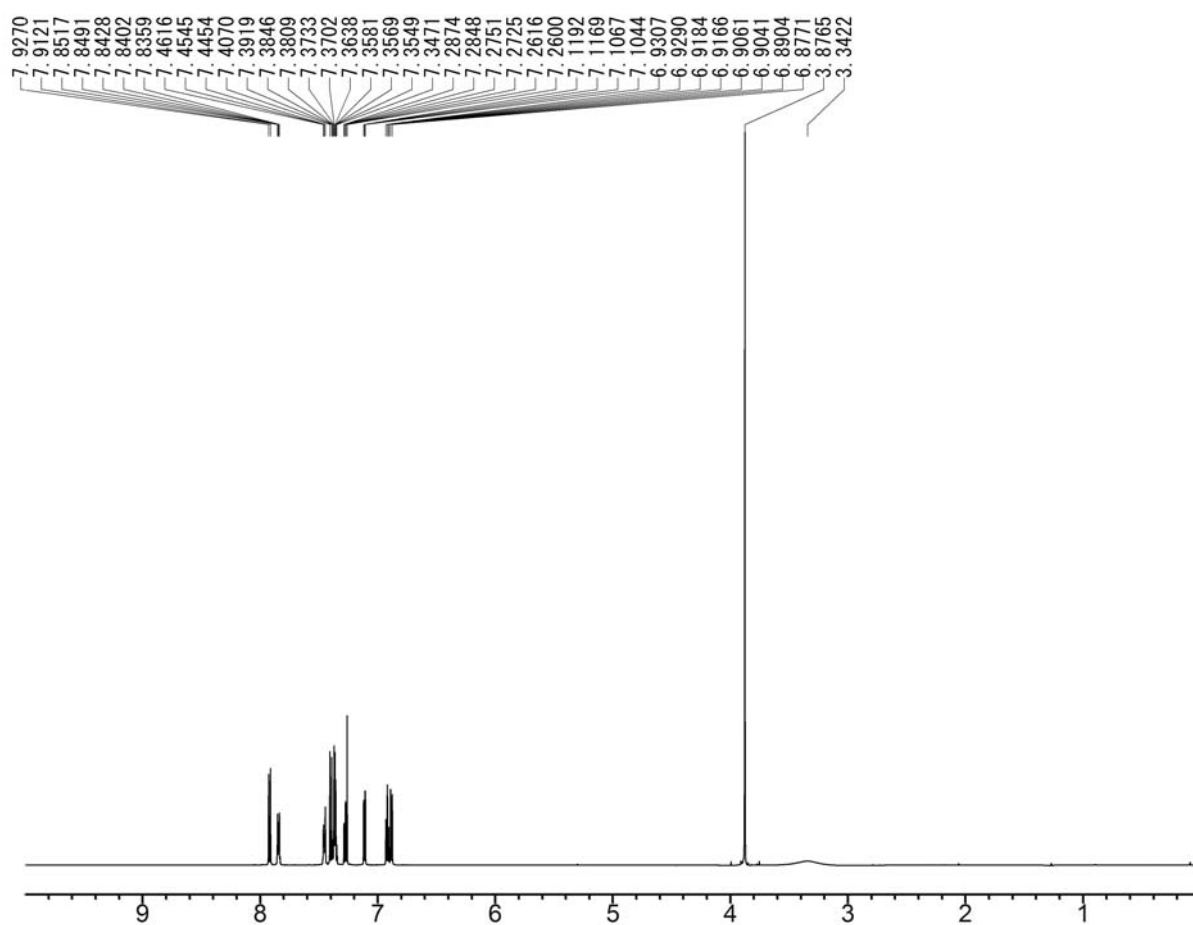

600 MHz  $^1\text{H}$  NMR of **21** in  $\text{CDCl}_3$ .

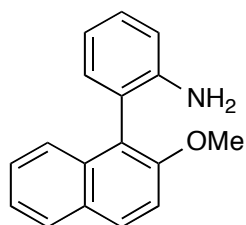

**21**

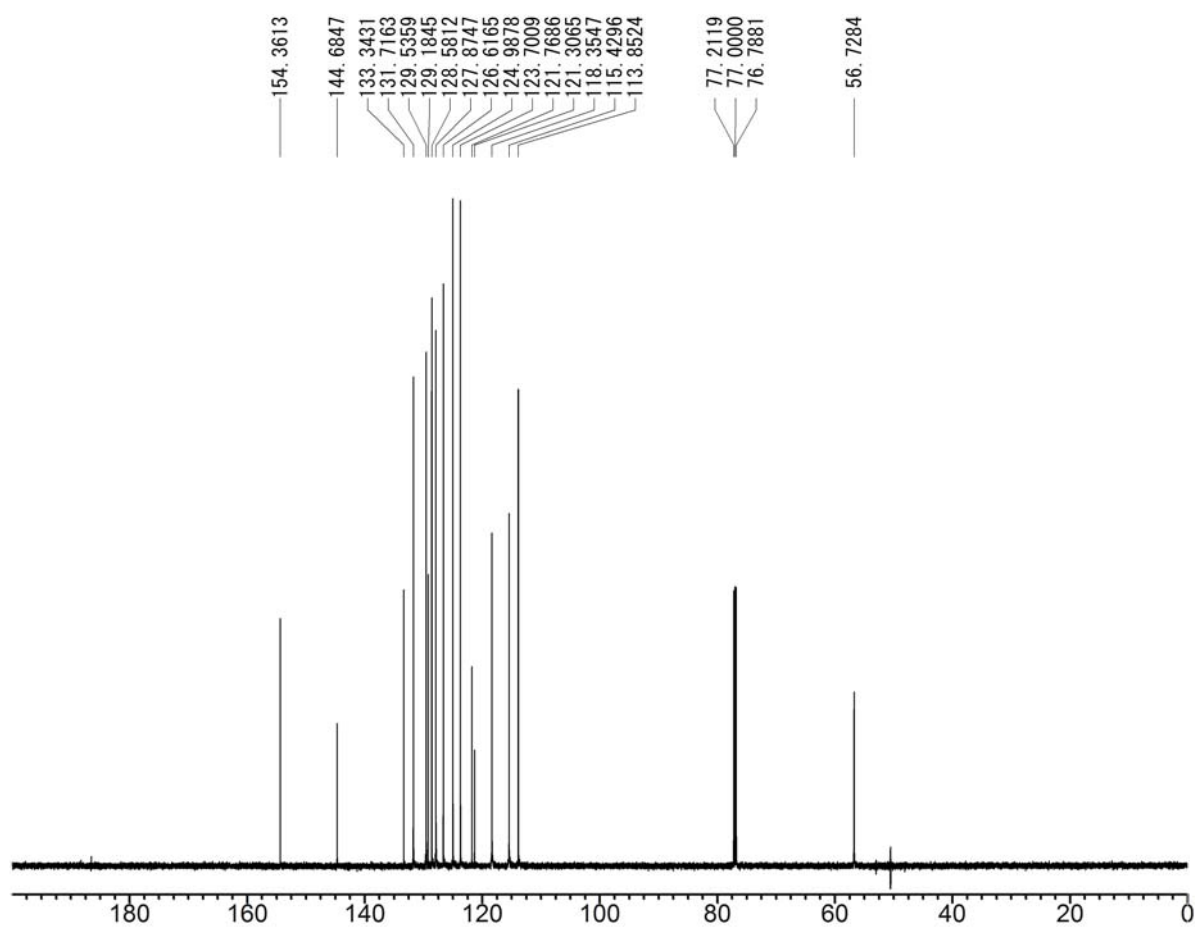

150 MHz  $^{13}\text{C}$  NMR of **21** in  $\text{CDCl}_3$ .

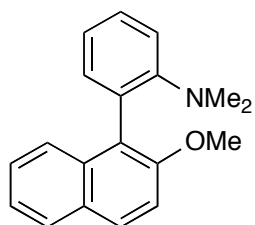

**22**

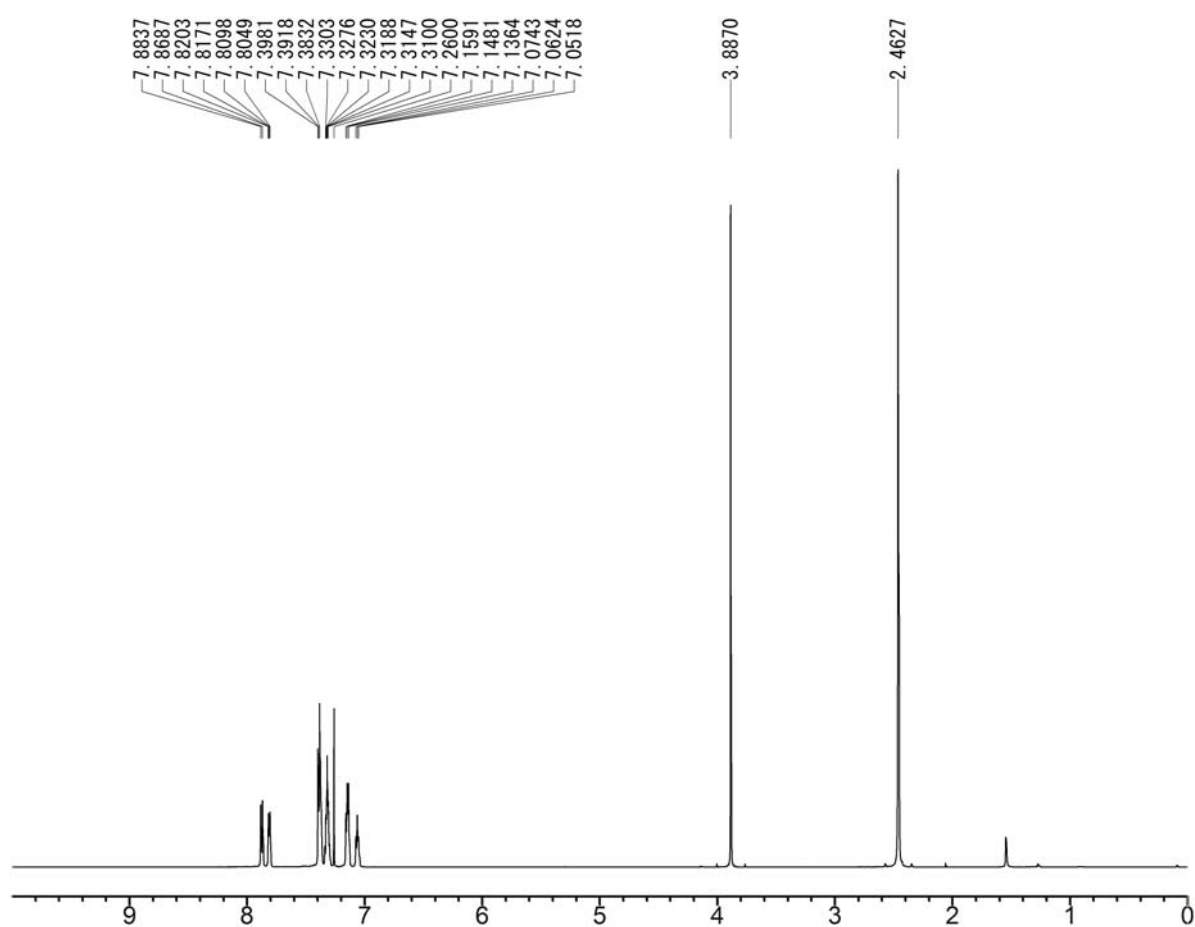

600 MHz  $^1\text{H}$  NMR of **22** in  $\text{CDCl}_3$ .





**22**

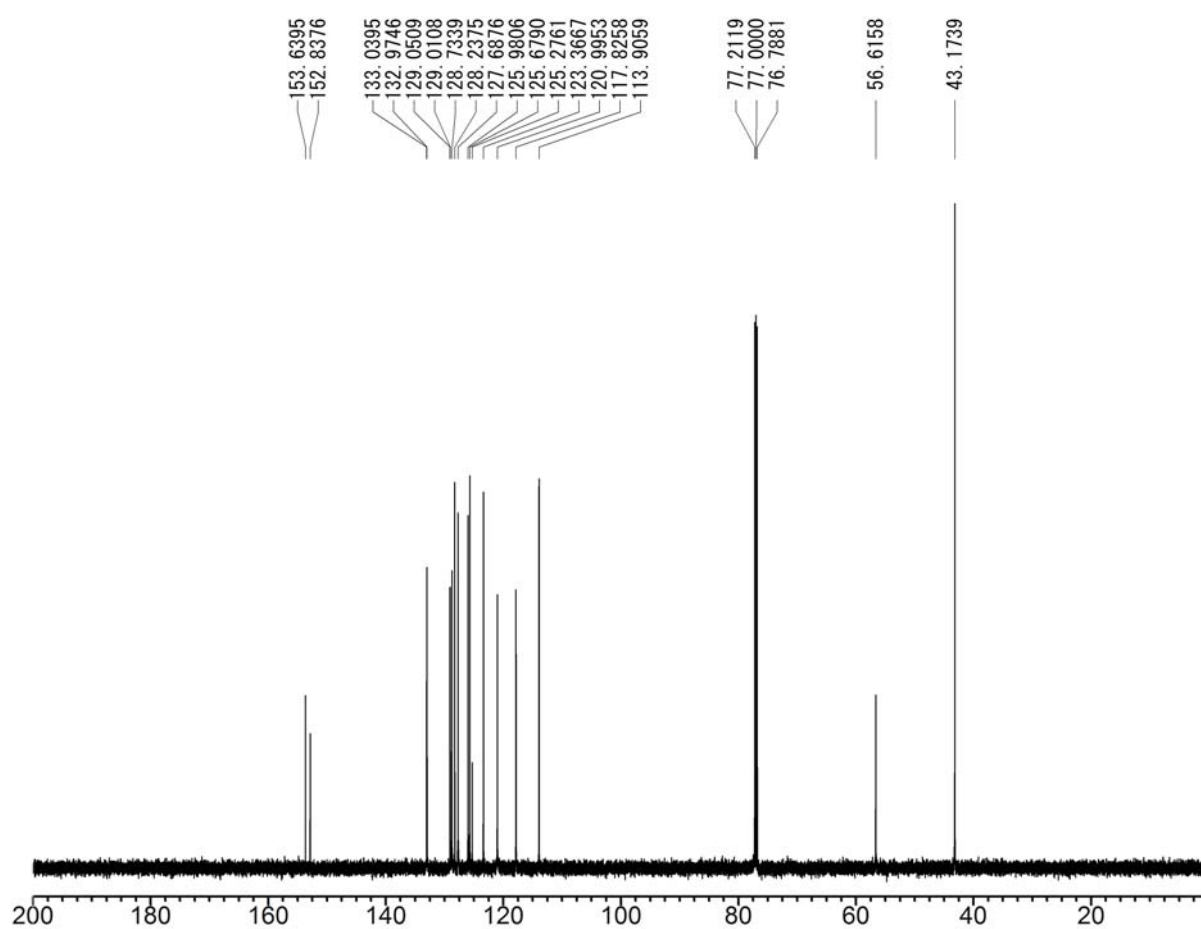

150 MHz  $^{13}\text{C}$  NMR of **22** in  $\text{CDCl}_3$ .

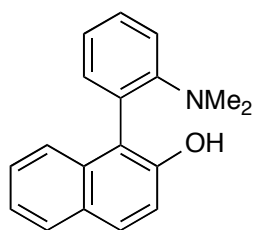

**23**

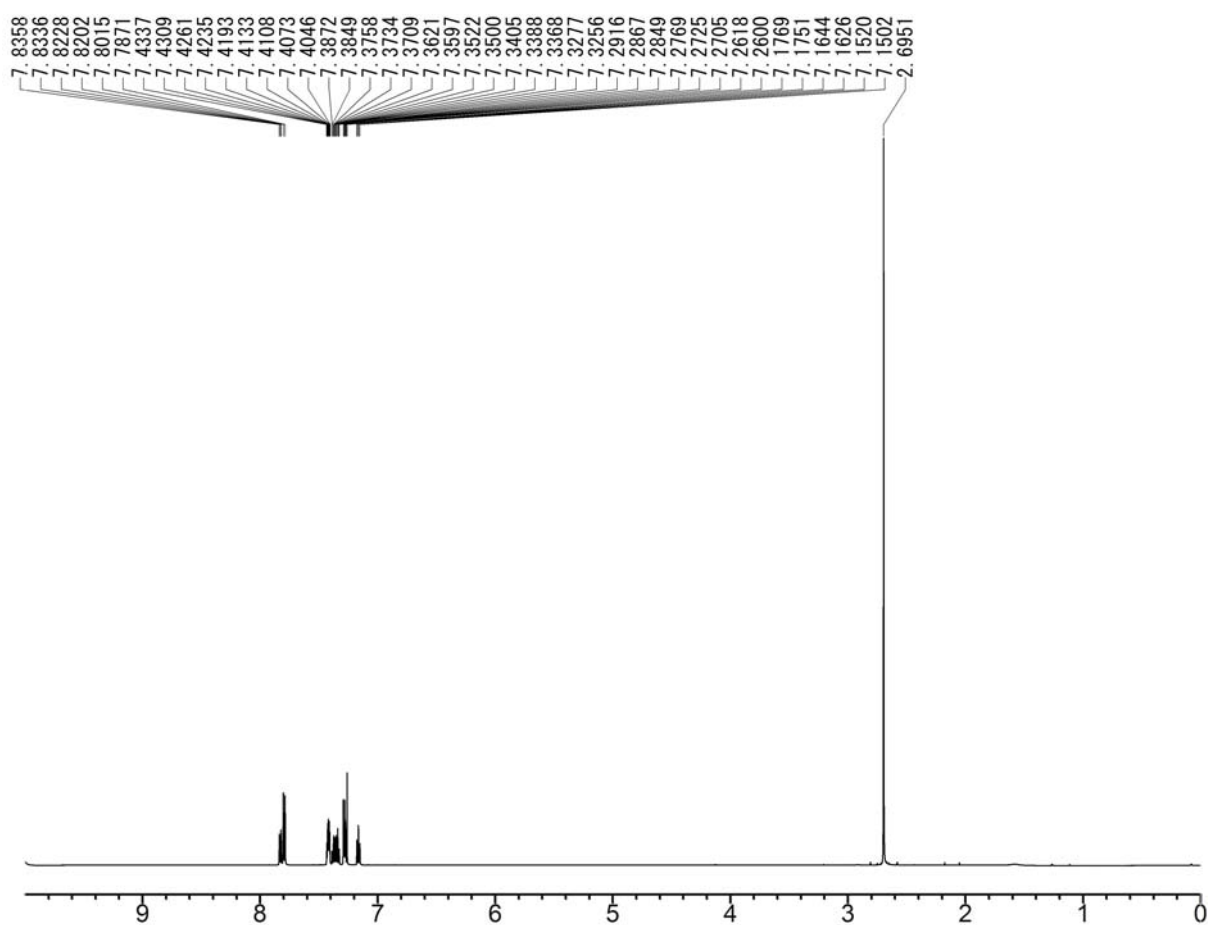

600 MHz  $^1\text{H}$  NMR of **23** in  $\text{CDCl}_3$ .



**23**

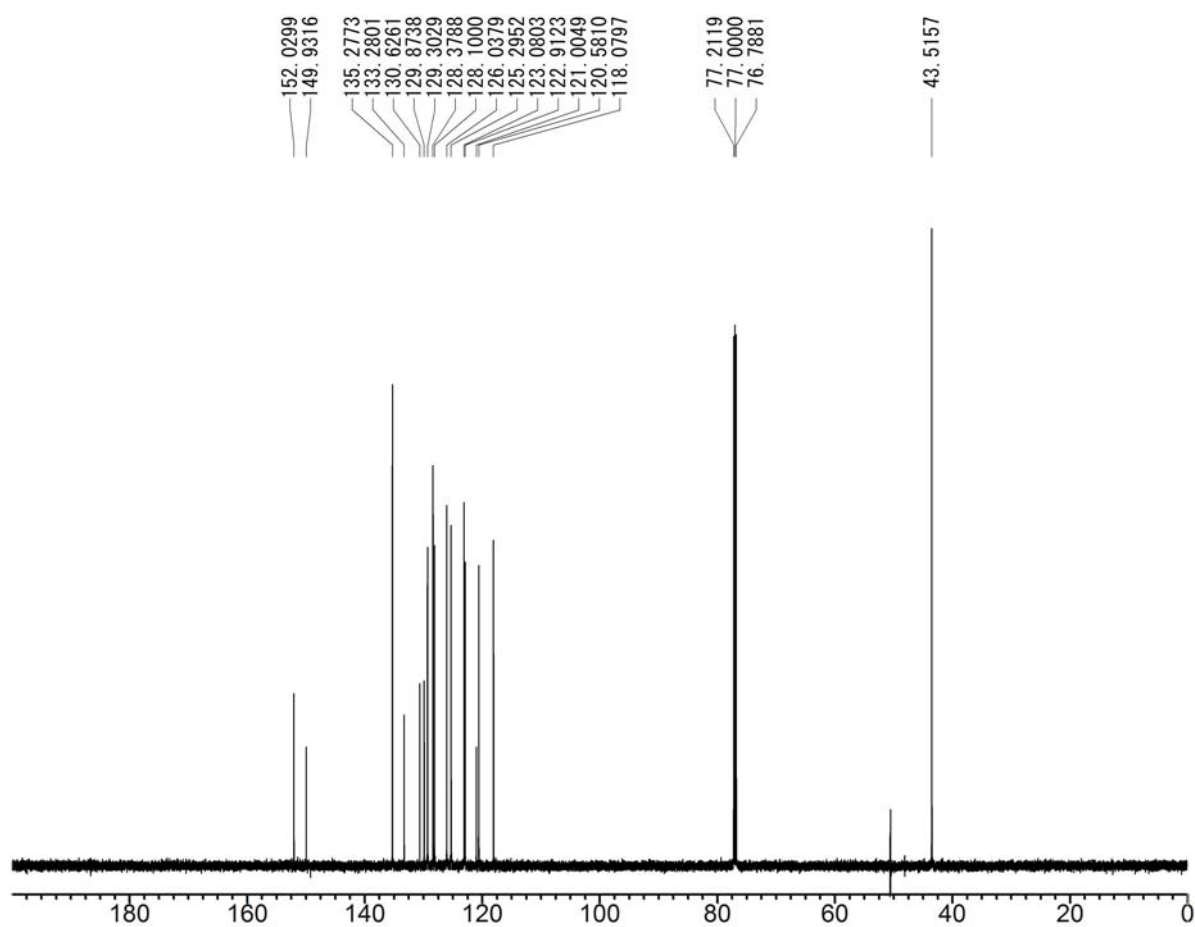

150 MHz  $^{13}\text{C}$  NMR of **23** in  $\text{CDCl}_3$ .

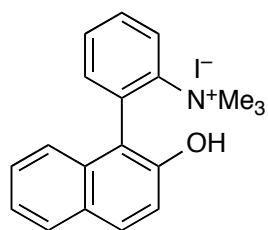

**24**

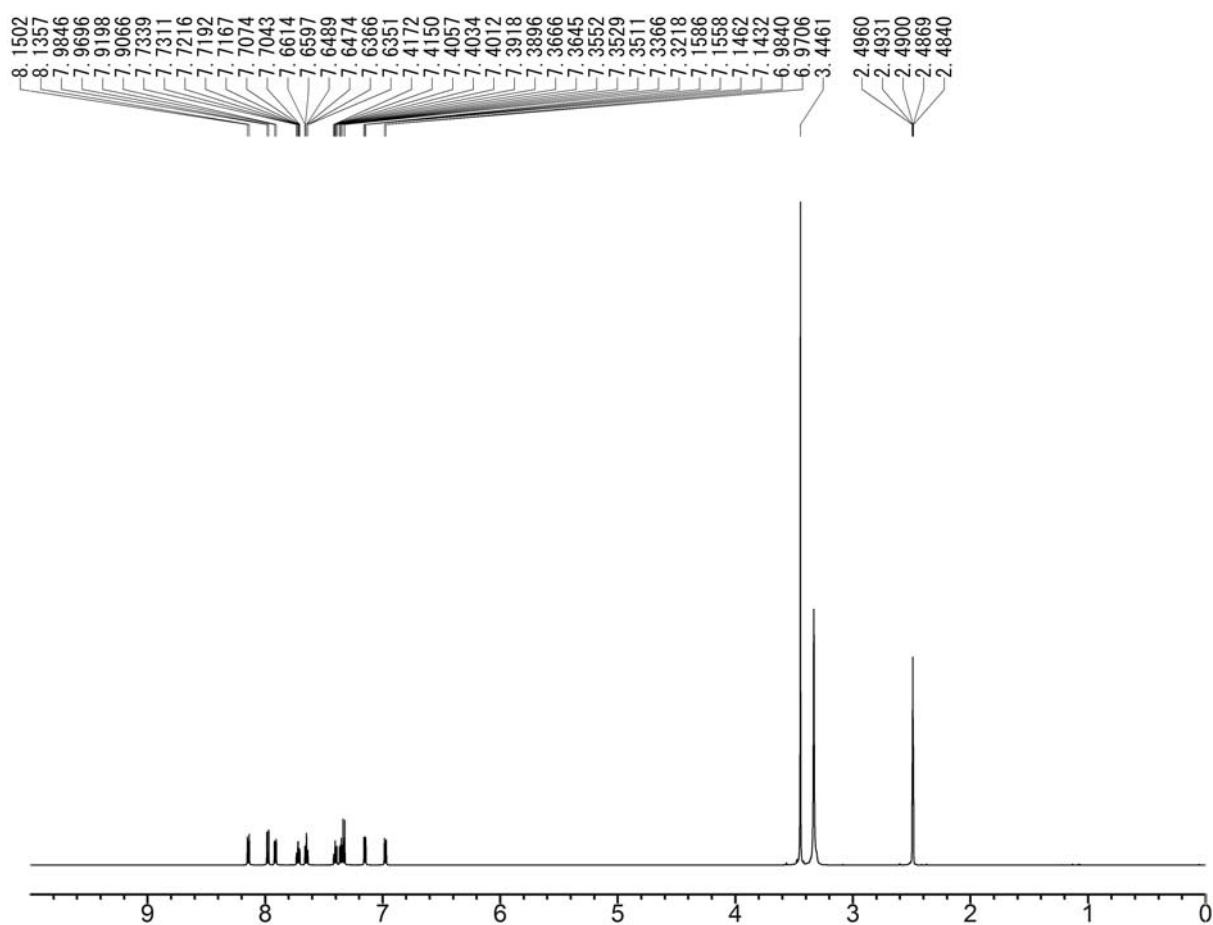

600 MHz  $^1H$  NMR of **24** in  $DMSO-d_6$ .



**24**

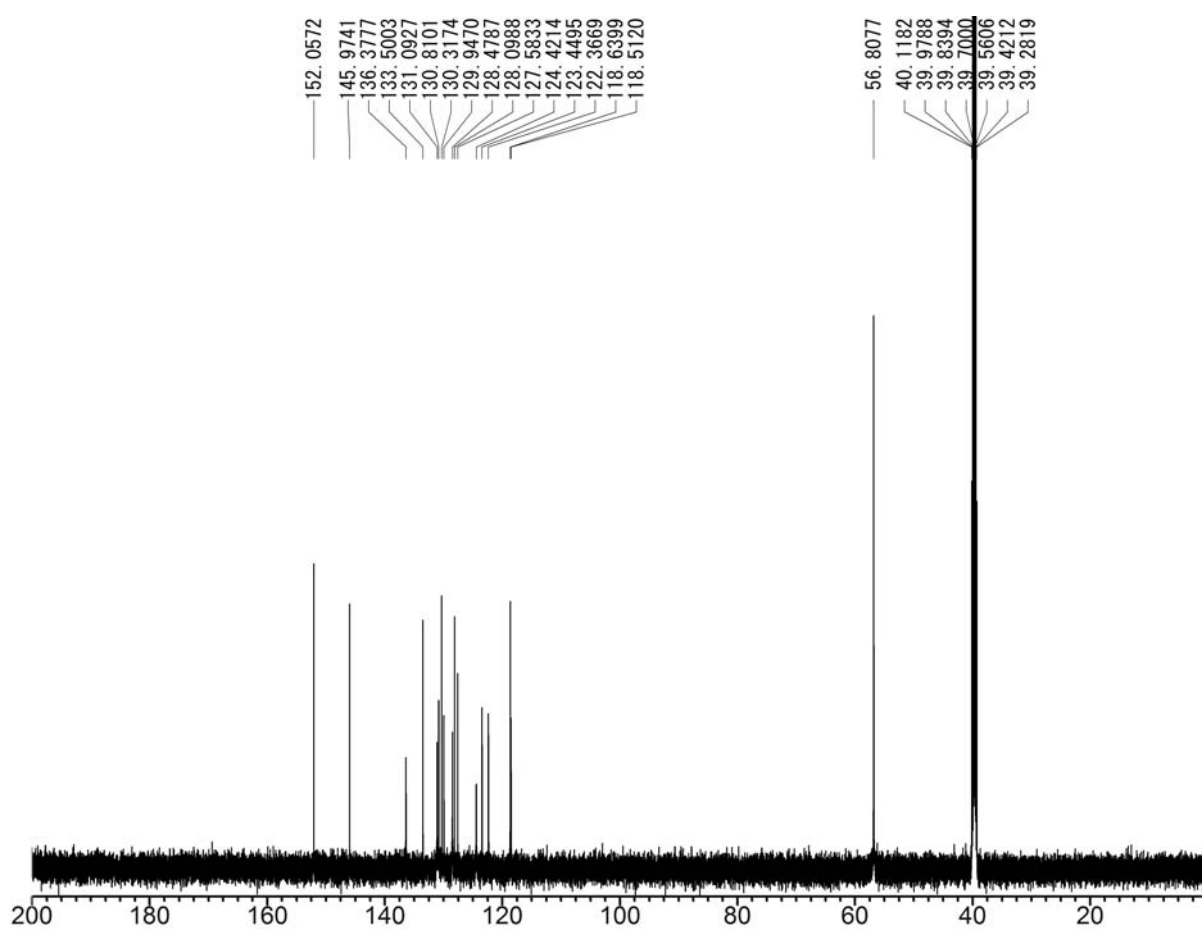

150 MHz  $^{13}\text{C}$  NMR of **24** in  $\text{DMSO-}d_6$ .

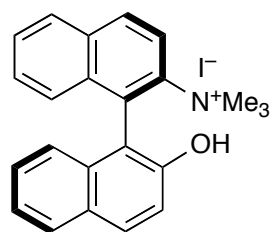

**26**

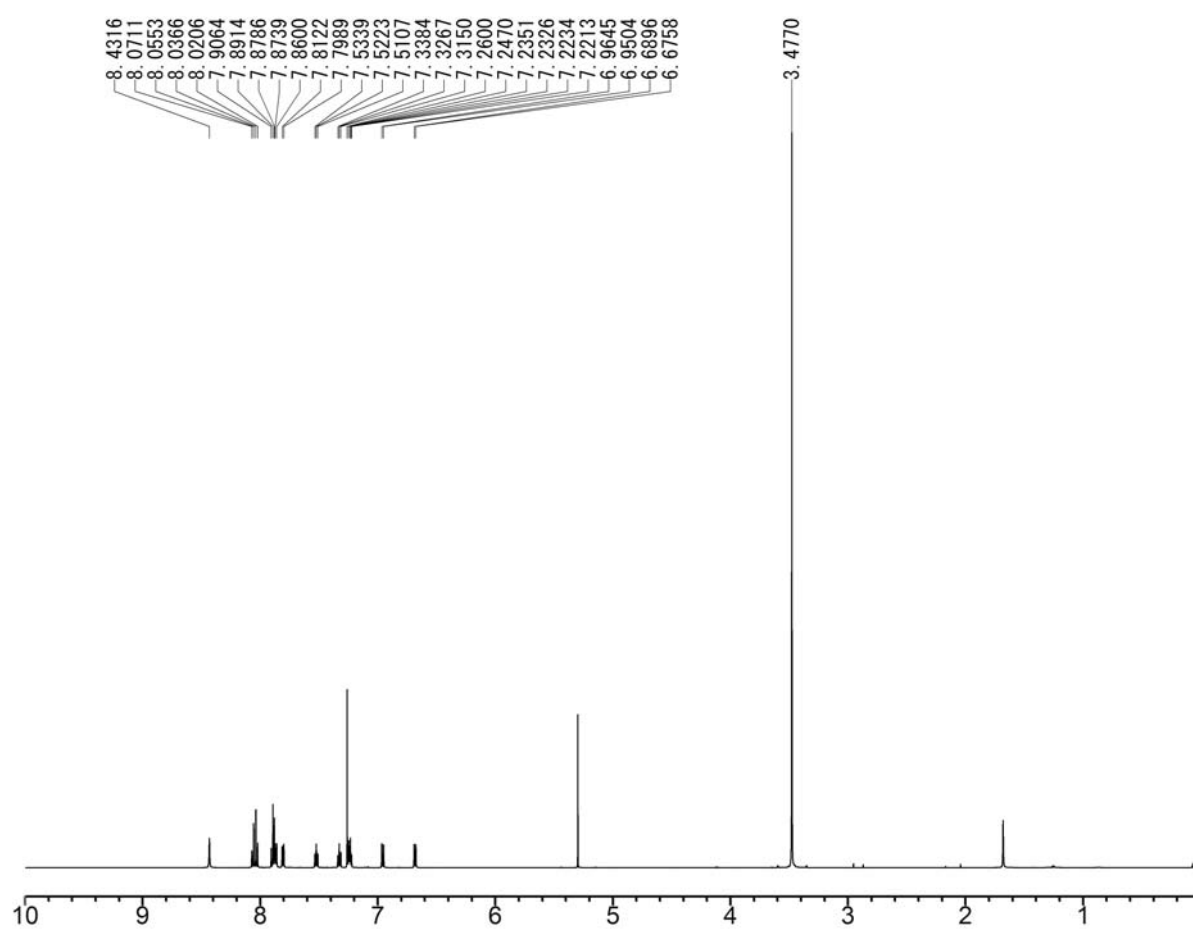

600 MHz  $^1\text{H}$  NMR of **26** in  $\text{CDCl}_3$ .

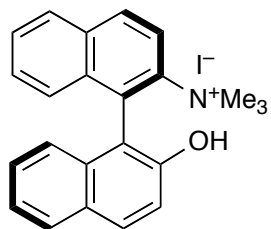

**26**

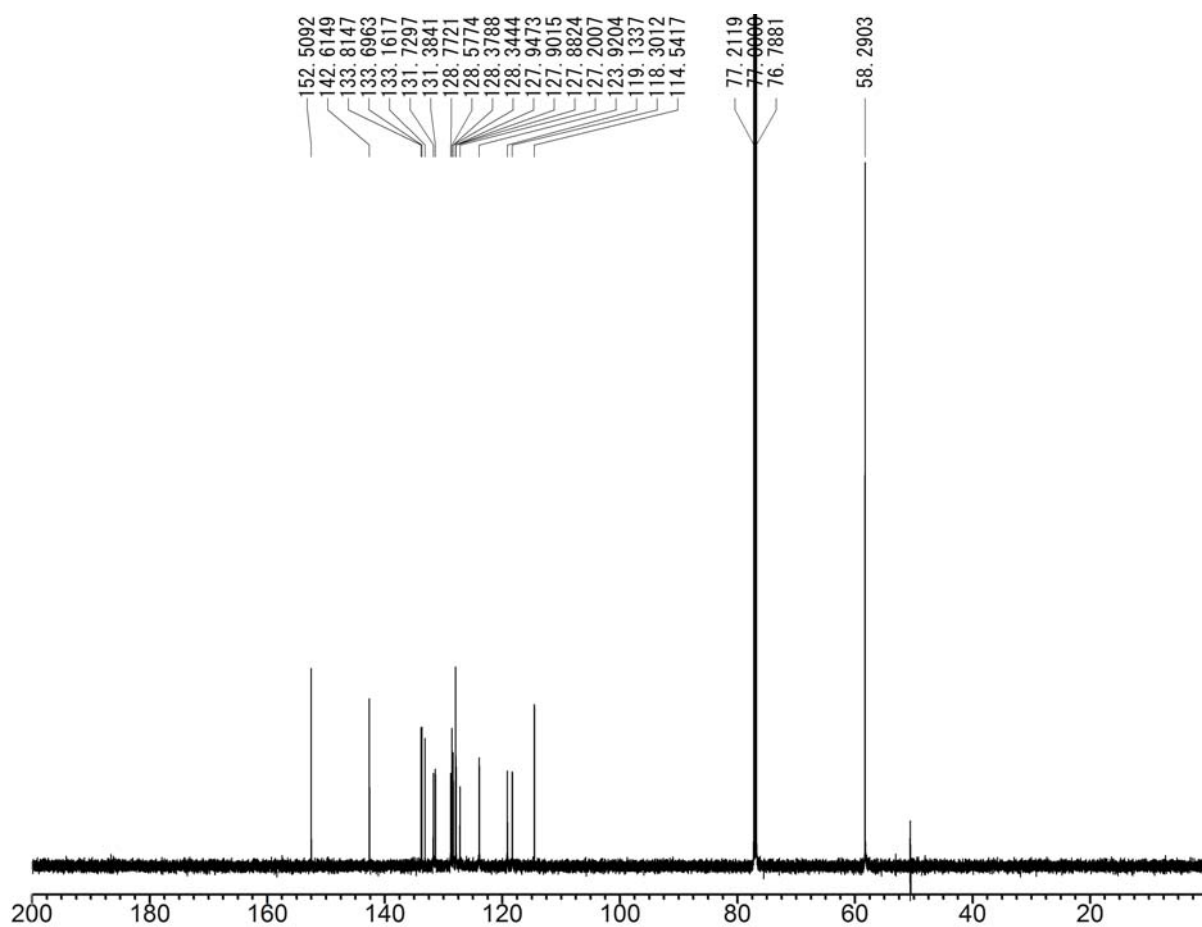

150 MHz  $^{13}\text{C}$  NMR of **26** in  $\text{CDCl}_3$ .

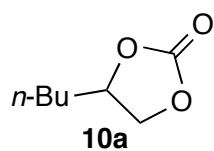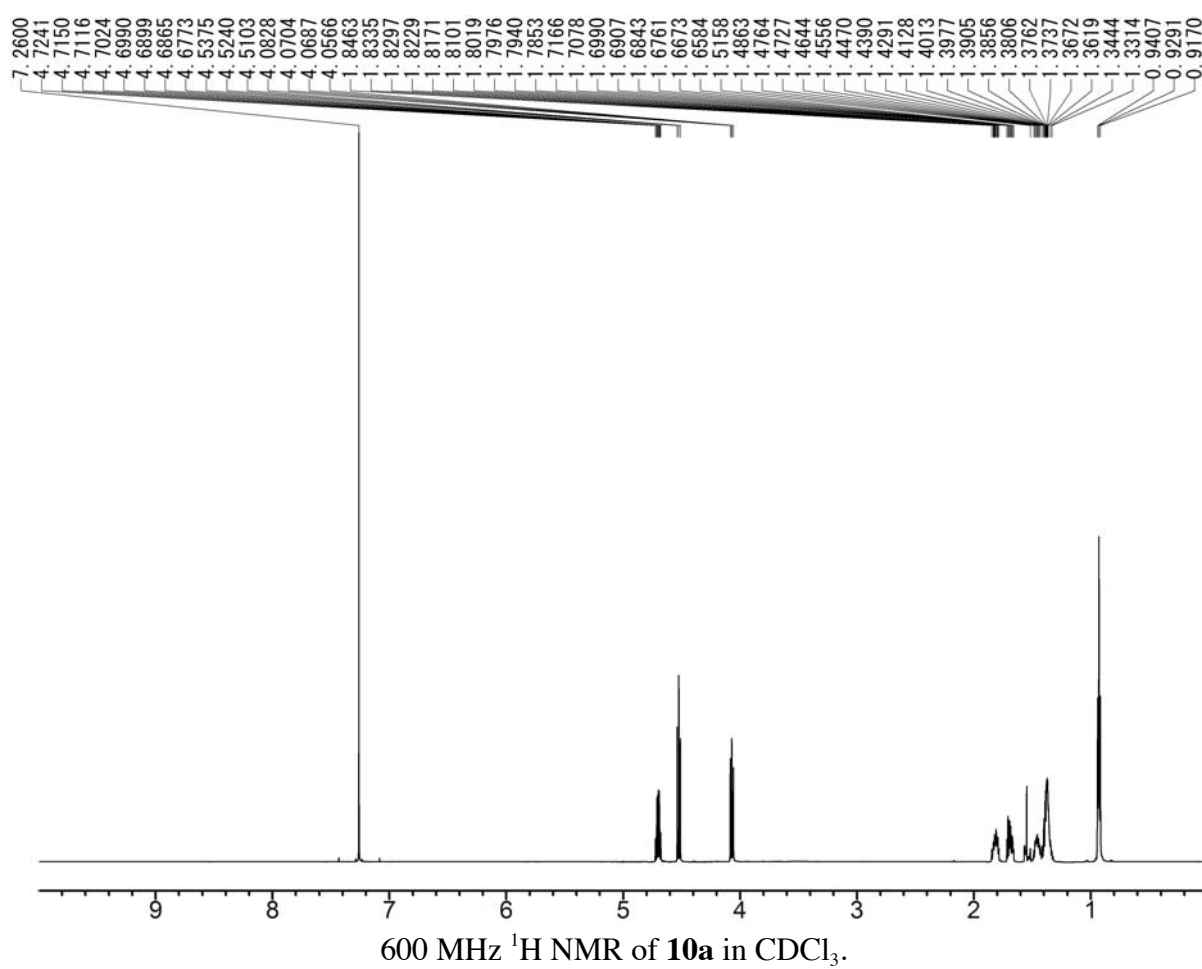



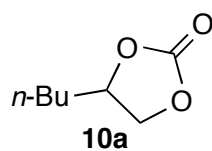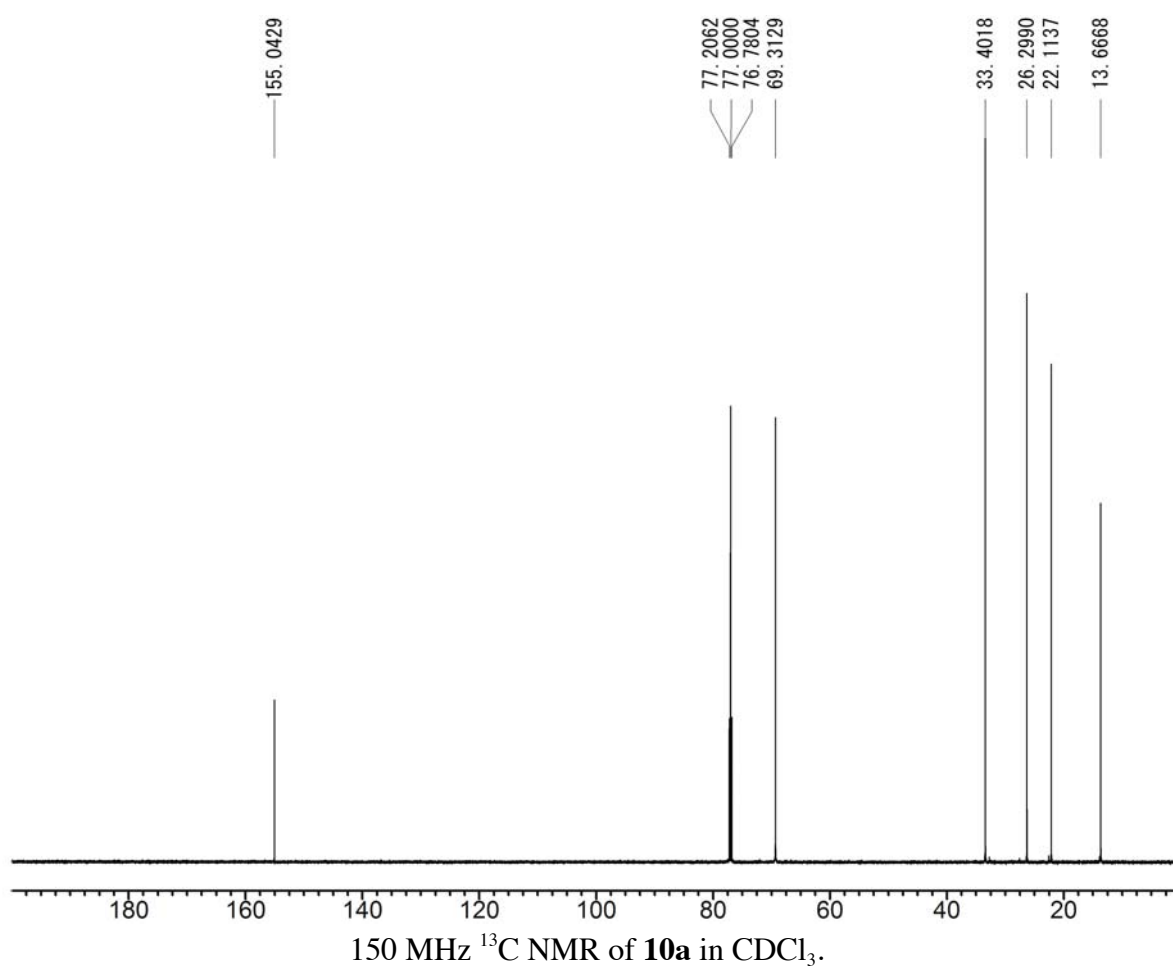

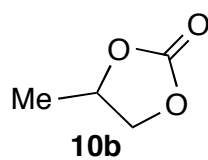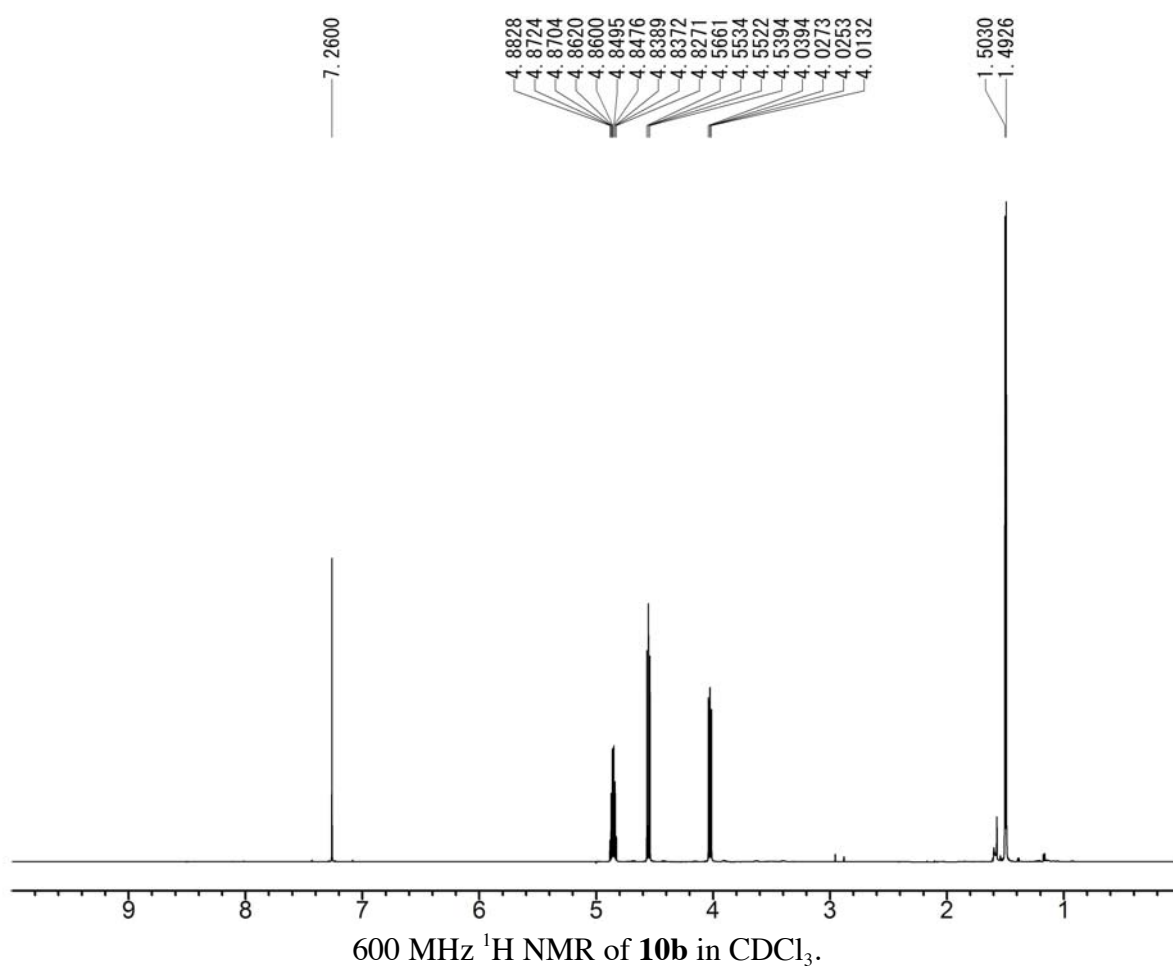

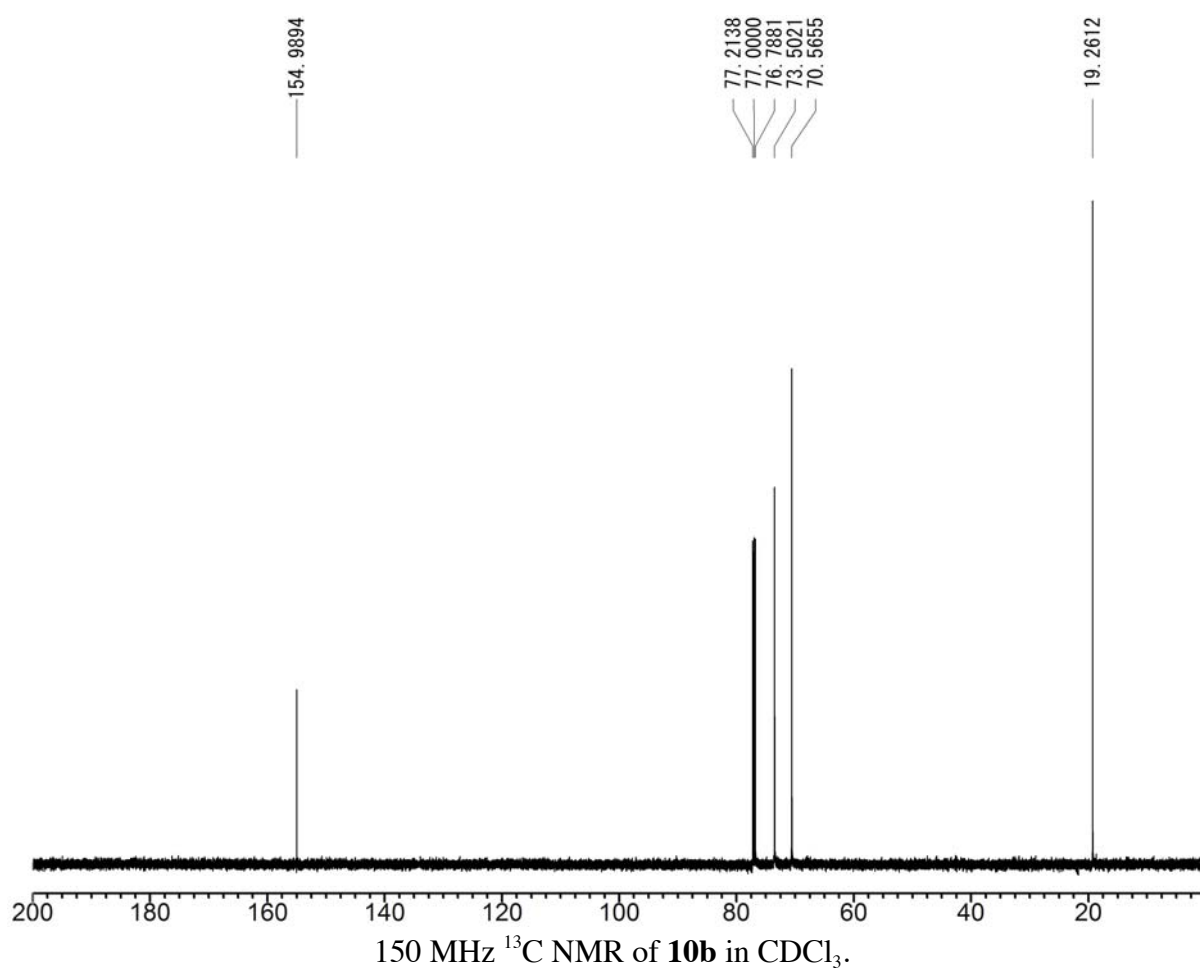

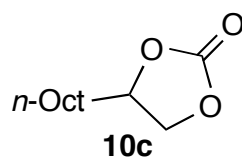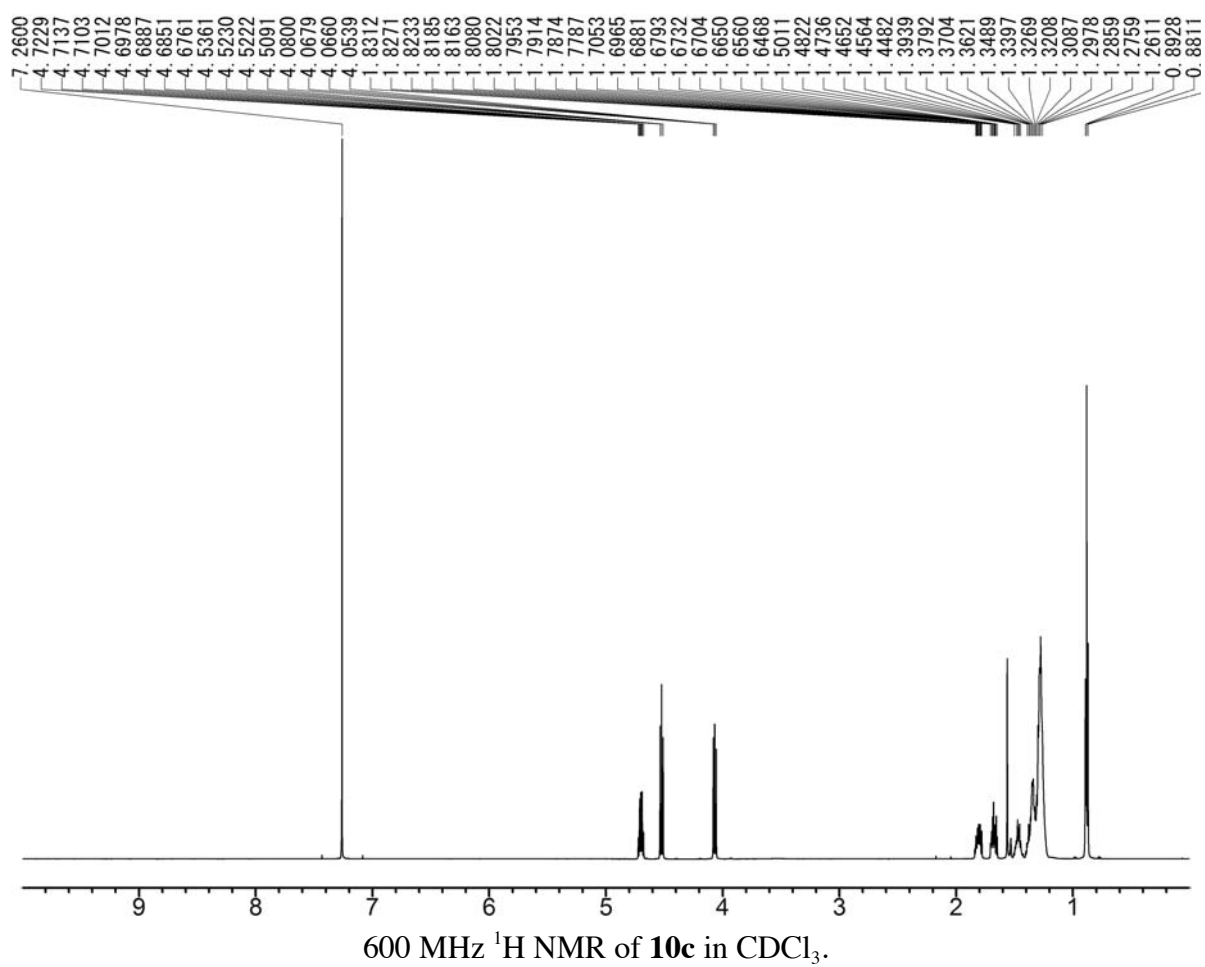

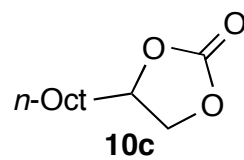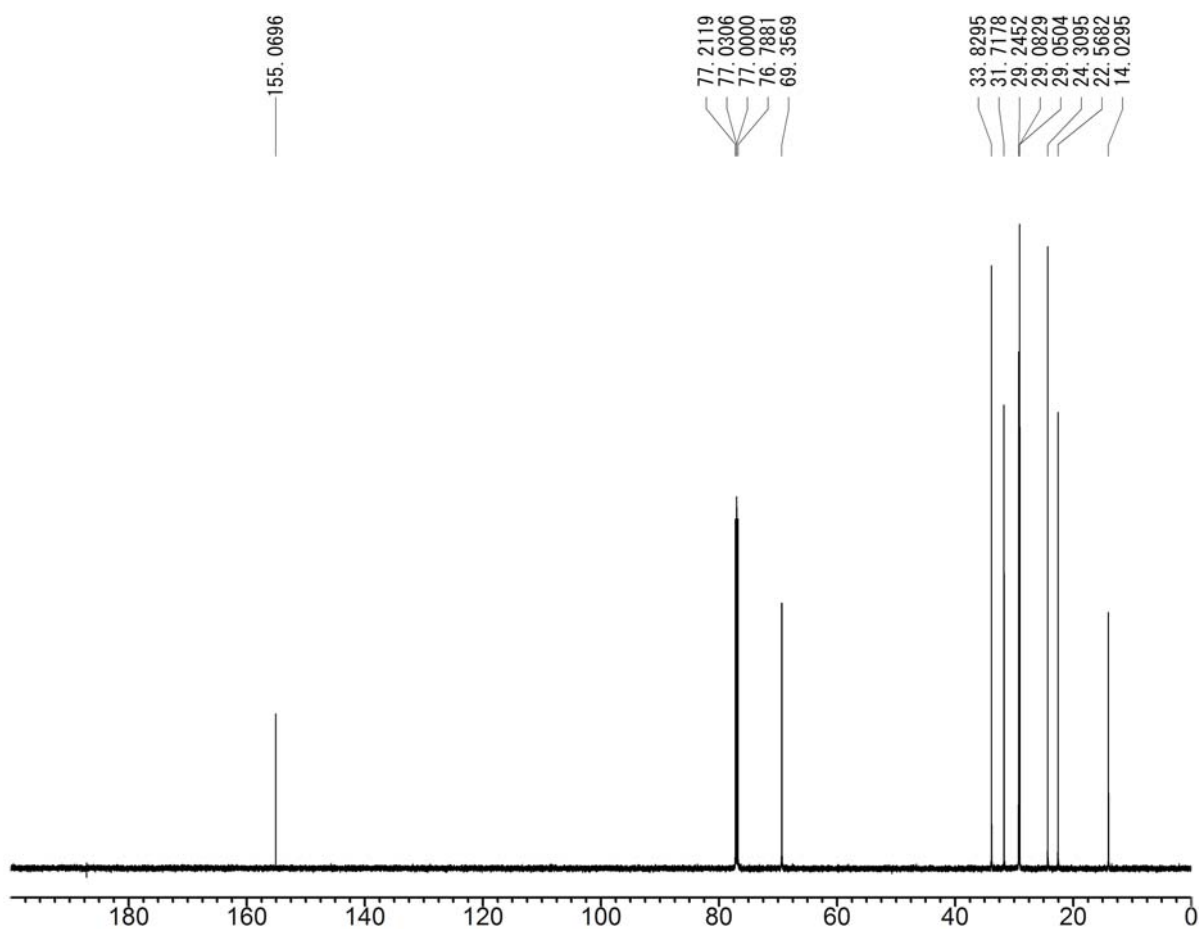

150 MHz  $^{13}\text{C}$  NMR of **10c** in  $\text{CDCl}_3$ .

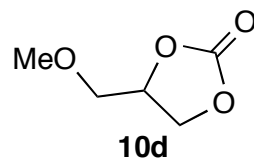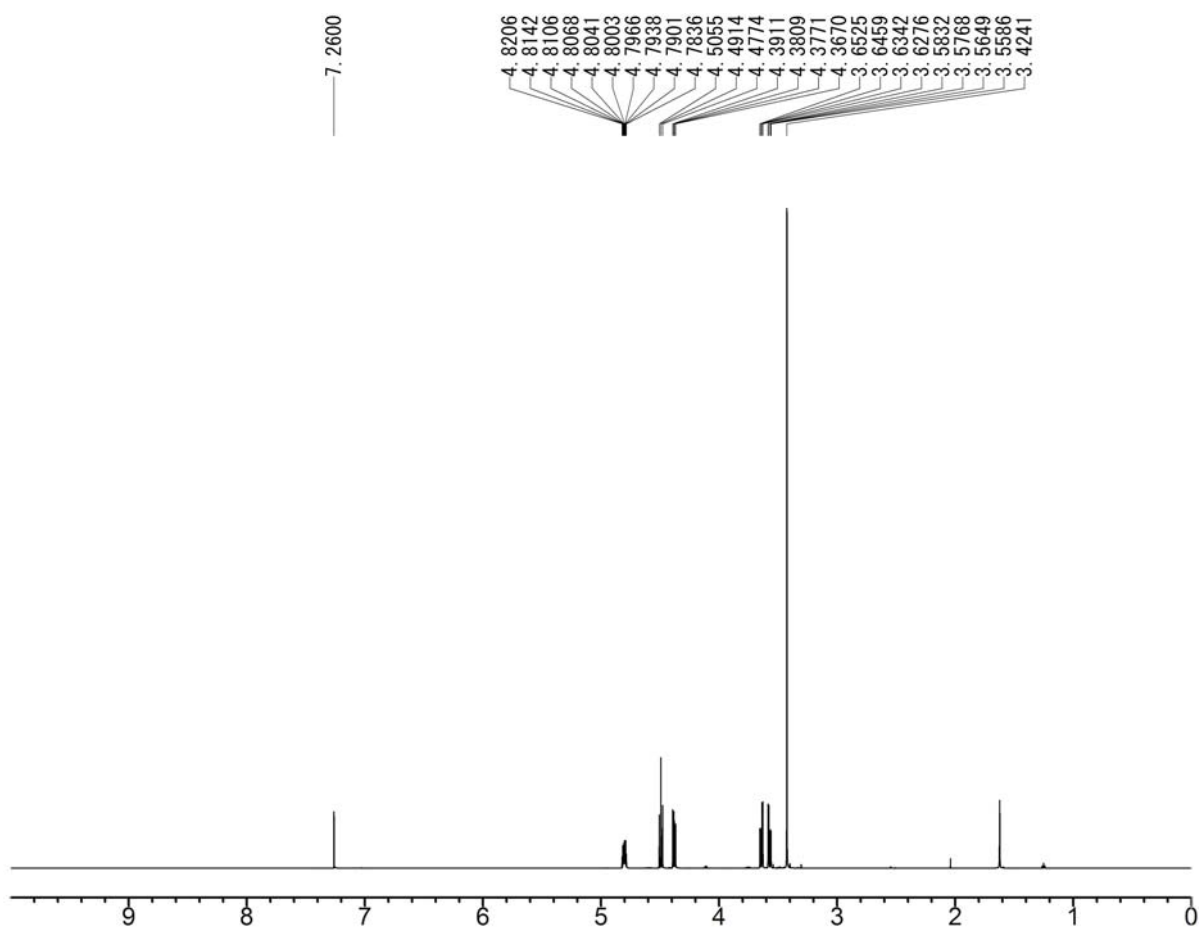

600 MHz  $^1\text{H}$  NMR of **10d** in  $\text{CDCl}_3$ .

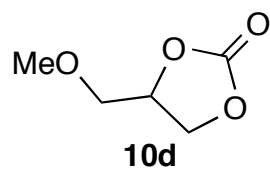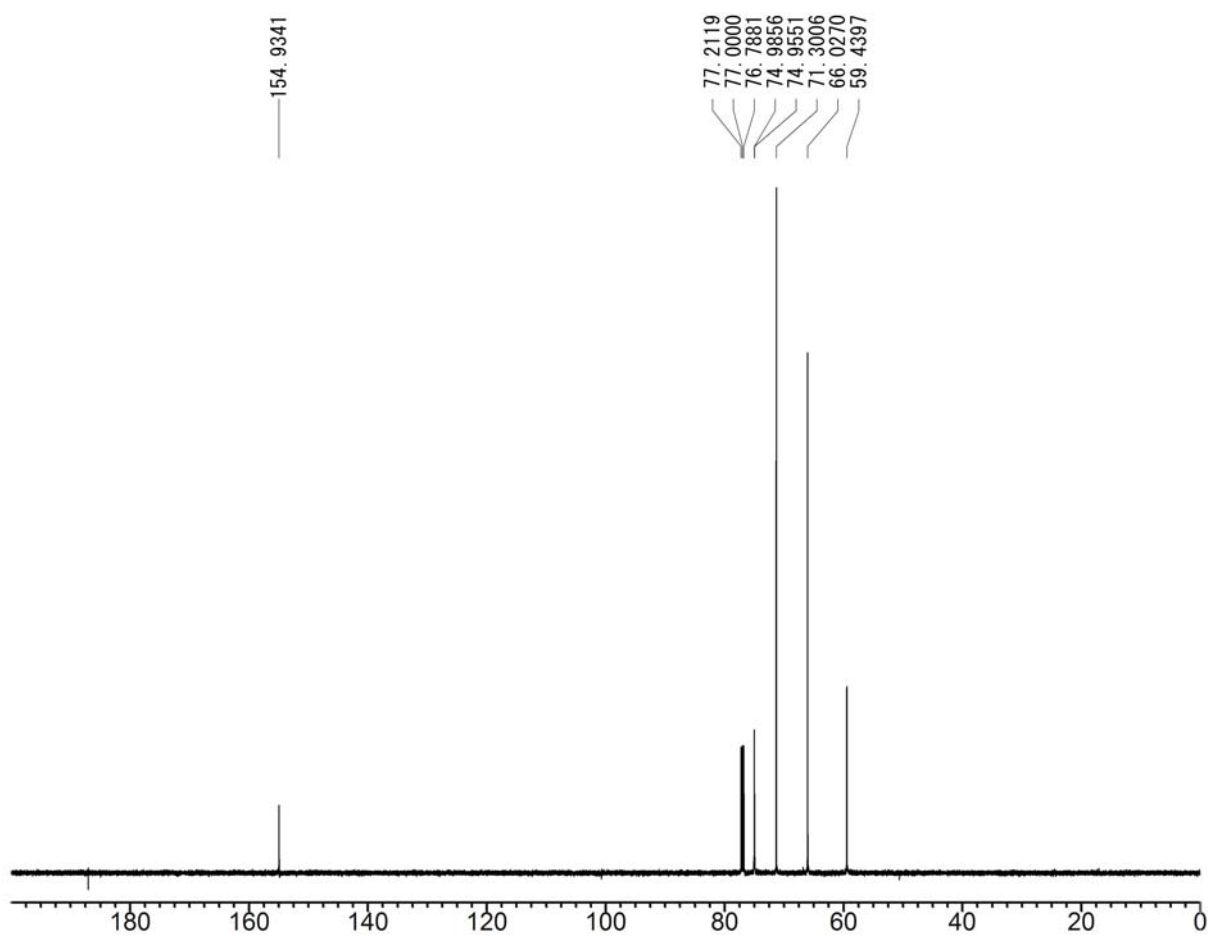

150 MHz  $^{13}\text{C}$  NMR of **10d** in  $\text{CDCl}_3$ .

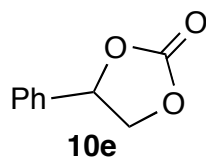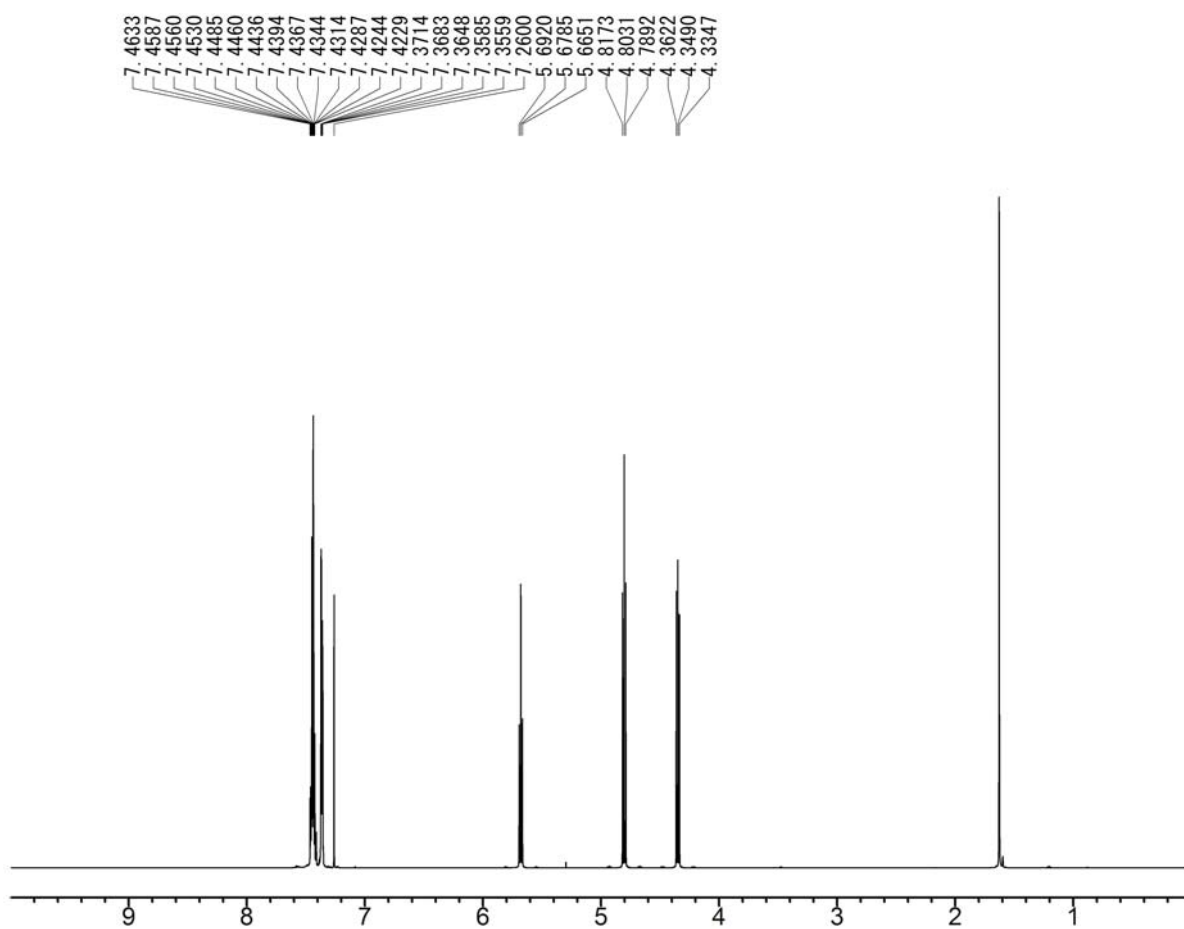

600 MHz  $^1\text{H}$  NMR of **10e** in  $\text{CDCl}_3$ .



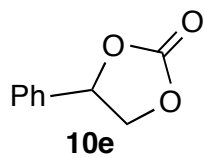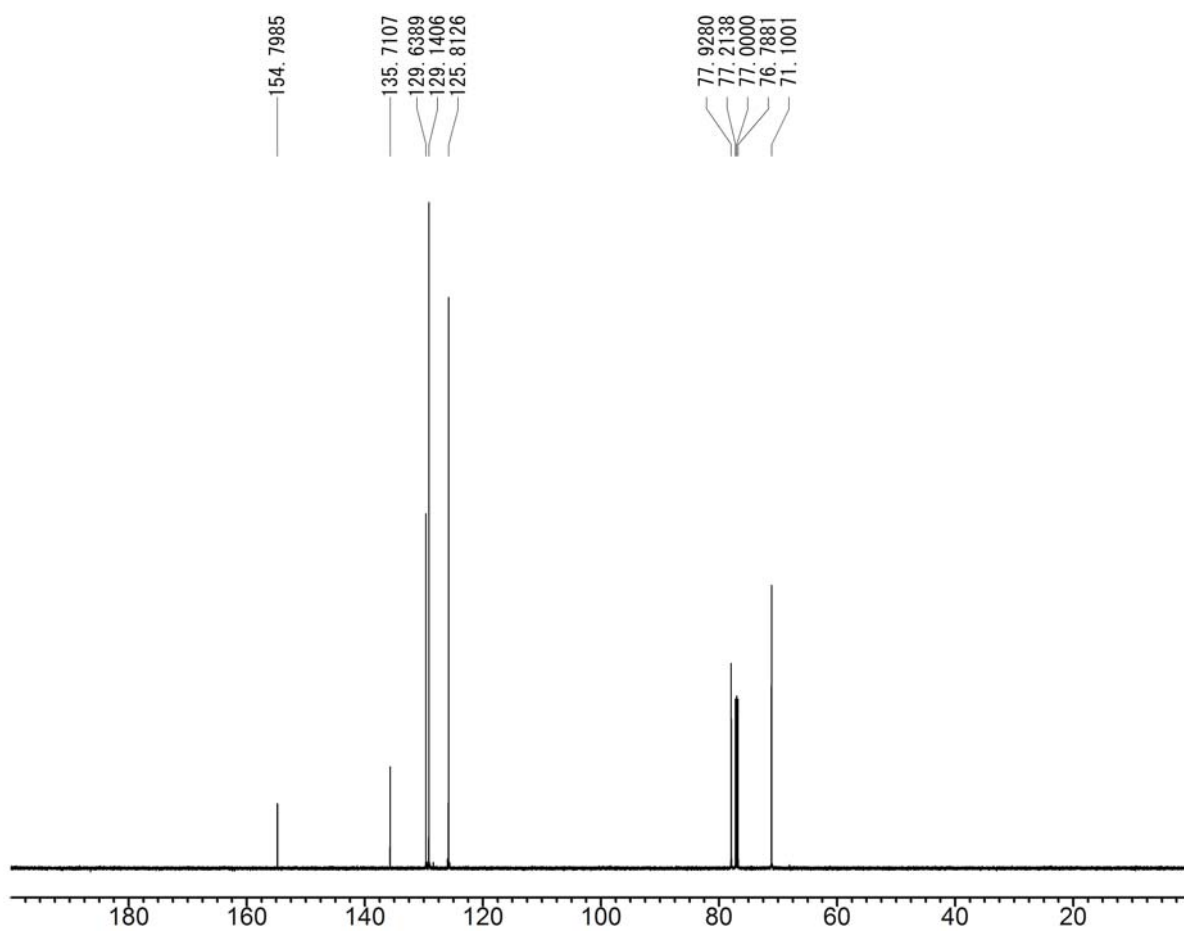

150 MHz  $^{13}\text{C}$  NMR of **10e** in  $\text{CDCl}_3$ .

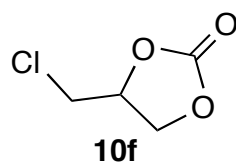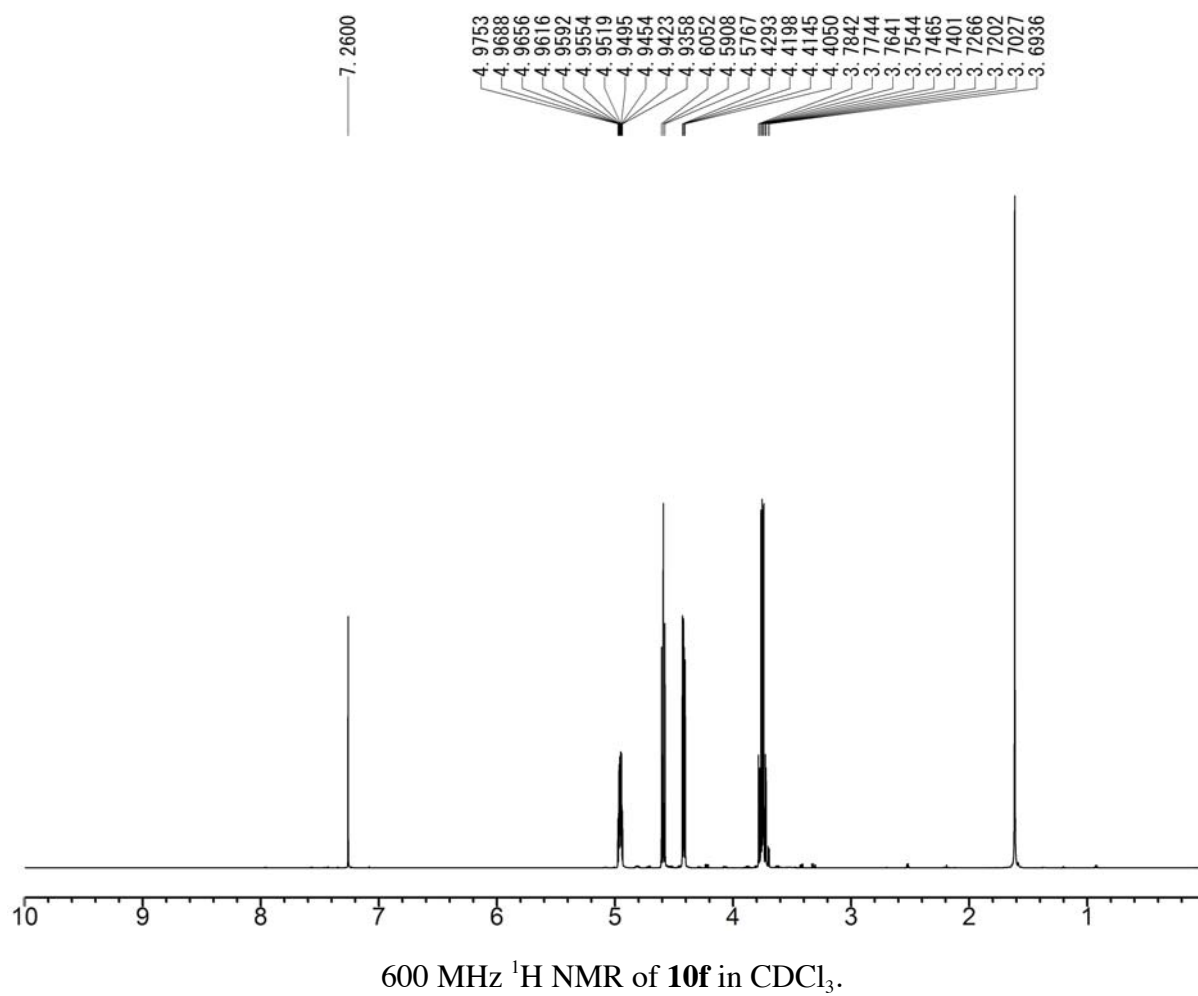

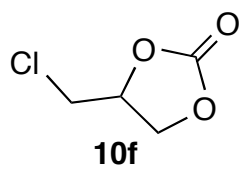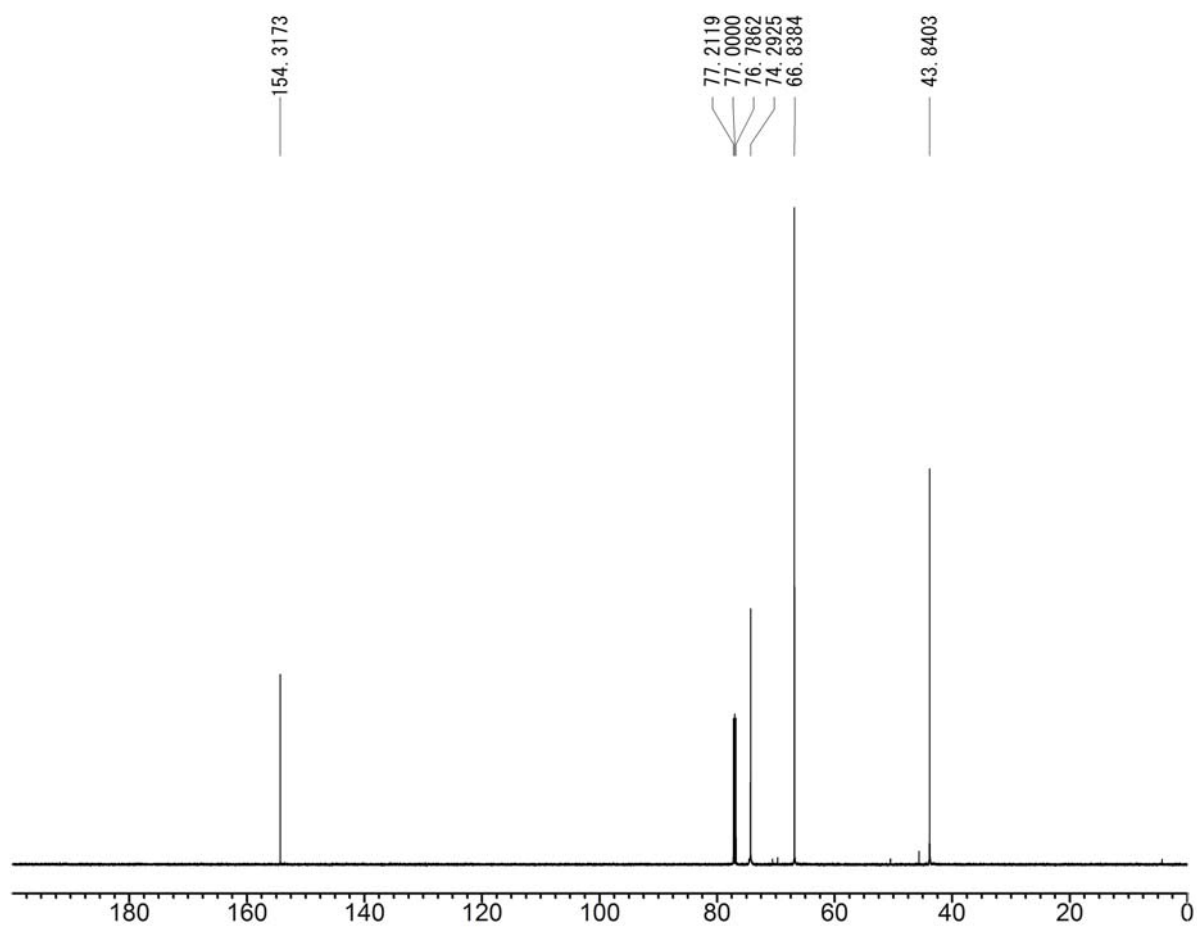

150 MHz  $^{13}\text{C}$  NMR of **10f** in  $\text{CDCl}_3$ .
